# Supplementary material for: RNA sequencing identifies lung cancer lineage and facilitates drug repositioning
Source: PeerJ. 2024 Sep 24;12:e18159. doi: 10.7717/peerj.18159 (PMC11430167; doi:10.7717/peerj.18159)
Supplement: Supplemental Information 3 [file peerj-12-18159-s003.xlsx]

## Sheet: Overview
List of Supplementary Tables
Supplementary Table 1. Summary of clinical patients
Supplementary Table 2. Information of tumor samples
Supplementary Table 3. Generated and used geneset
Supplementary Table 4. Information of preclinical models (cell lines and PDX)
Supplementary Table 5. Differential genes within prox.-prolif subsets
Supplementary Table 6. Comparative sample annotations of NMF and HC clustering
Supplementary Table 7. Association of cluster and clinical information
Supplementary Table 8. Single-cell analysis of predicted clusters
Supplementary Table 9. Survival analysis of neuroendocrine-upregulated CpGs
Supplementary Table 10. Prediction of cluster-specific compounds
Supplementary Table 11. Expression profile of NCI-H1944 treated by dinaciclib and alvocidib (raw count mRNA)
Supplementary Table 12. Pathway enrichments of NCI-H1944 treated by dinaciclib and alvocidib
Supplementary Table 13. Potential genes related to drug sensitivity of dinaciclib and alvocidib

## Sheet: Table S1
Table S1. Overall description of cohort information
42-gene classifier
treatment-naive NSCLC cohorts	application	number of used sample
TCGA-LUAD	Survival analysis; chemotherapy	320
GSE72094	Survival analysis	207
CPTAC-LUAD	RNA-Protein validation	77
GSE68465	Verified by NMF only	314
PMID: 36384096	Verified by NMF only	87
PMID: 30992440	Verified by NMF only	131
GSE19188	Specificity validation; chemotherapy related	153
GSE37745	Specificity validation	196
GSE30219	Specificity validation	307
GSE148071 (single-cell RNA)	Transcription factor activity validation	1000 (random)
GSE111907 (flow-sorted bulk RNA)	Transcription factor activity validation	21 epithelium; 16 immune, LUAD
GSE154826 (flow-sorted single-cell RNA)	Tumor microenvironment simulation	27
Specific mutations
ICIs-treated NSCLC cohorts	souce	number of used sample
Miao_2018	PMID: 30150660	28 (only including LUAD)
Hellmann_2018	PMID: 29657128	59 (only including nonsquamous)
Simplified four immune gene set (PMID: 30560866)
treatment-naive NSCLC cohorts	souce	number of used sample
TCGA_LUAD_2016	PMID: 25079552	576
TCGA_LUSC_2016	PMID: 22960745	552
Shedden_2008	GSE68465	442
Schabath_2016	GSE72094	442
Rousseaux_2013	GSE30219	307
Sato_2013	GSE41271	275
Okayama_2012	GSE31210	224
Bhattacharjee_2001	PMID: 11707567	203
Botling_2013	GSE37745	196
Der_2014	GSE50081	181
Tang_2013	GSE42127	176
Fujiwara_2012b	GSE20853	164
Takeuchi_2006	GSE11969	163
Hou_2010	GSE19188	156
expO	GSE2109	141
Lee_2008	GSE8894	138
Zhu_2010	GSE14814	133
Raponi_2006	GSE4573	130
Lu_2010	GSE19804	120
Tomida_2009	GSE13213	117
Selamat_2012	GSE32863	116
Bild_2006	GSE3141	111
Kabbout_2013	GSE43458	110
Landi_2008	GSE10072	107
Noro_2017	GSE74777	107
Wilkerson_2012	GSE26939	102
Micke_2011	GSE28571	100
All expression matix with more than 100 people downloaded by Cai et al. Fujiwara_2012b show poor performance		5589
ICIs-treated NSCLC cohorts	souce	number of used sample
Pender_2021	PMID: 33020056	25
Cho_2020	GSE126044, GSE126043	16,18
Jung_2019	GSE135222, GSE119144	27,60
Ravi_2023	PMID: 37024582

## Sheet: Table S2_30992440
Sample	Stage	Age	Gender	Smoking	cluster	Estimate_purity
1007	IV	43	Male	Yes	bronchioid	0.46526
1009	II	80	Male	Yes	squamoid	0.559939
1014	I	50	Male	Yes	bronchioid	0.812933
1015	I	51	Male	Yes	squamoid	0.49525
1017	II	72	Male	Yes	squamoid	0.725239
1021	II	59	Male	Yes	squamoid	0.875283
1026	I	62	Male	Yes	bronchioid	0.505655
1027	I	63	Male	Yes	bronchioid	0.635586
1028	I	70	Male	Yes	squamoid	0.380423
1030	I	69	Male	Yes	neuroendocrine	0.571661
1033	III	66	Male	Yes	squamoid	0.585386
1037	I	58	Male	Yes	bronchioid	0.667435
1039	I	65	Male	Yes	squamoid	0.591777
1040	I	63	Male	Yes	bronchioid	0.669238
1042	I	40	Female	No	bronchioid	0.527334
1043	II	57	Female	No	bronchioid	0.471679
1050	I	65	Male	No	bronchioid	0.478292
1052	I	68	NA	Yes	squamoid	0.43072
1054	I	76	Male	Yes	bronchioid	0.61372
1059	II	70	Male	No	bronchioid	0.644859
1060	I	60	Female	No	bronchioid	0.552695
1061	I	70	Female	No	bronchioid	0.818364
1069	III	50	Male	Yes	neuroendocrine	0.571396
1070	I	62	Male	Yes	bronchioid	0.591499
1072	IV	57	Male	Yes	squamoid	0.739076
1078	III	32	Male	No	squamoid	0.454592
1079	II	72	Female	No	bronchioid	0.567981
2001	II	65	Male	Yes	bronchioid	0.768821
2002	II	59	Male	Yes	bronchioid	0.763508
2008	III	52	Male	Yes	bronchioid	0.331765
2013	I	64	Male	Yes	squamoid	0.719627
2014	III	72	Male	Yes	squamoid	0.474491
2026	I	61	Male	Yes	squamoid	0.523405
2032	II	63	Male	Yes	squamoid	0.4375
2035	I	59	Male	Yes	squamoid	0.558292
2041	I	58	Female	No	bronchioid	0.621843
2042	III	66	Female	No	bronchioid	0.553757
2044	I	56	Female	No	bronchioid	0.439061
2045	I	64	Female	No	bronchioid	0.610108
3003	I	76	Male	Yes	bronchioid	0.523816
3004	II	63	Male	Yes	squamoid	0.803326
3011	I	64	Male	Yes	squamoid	0.394607
3012	III	50	Male	Yes	bronchioid	0.726726
3017	I	60	Male	Yes	bronchioid	0.43889
3022	I	67	Male	Yes	squamoid	0.55065
3029	I	64	Male	Yes	neuroendocrine	0.754818
3035	I	78	Male	Yes	bronchioid	0.818179
3040	IV	52	Female	No	bronchioid	0.630089
3043	III	66	Female	No	bronchioid	0.593598
3044	III	68	Female	No	bronchioid	0.61819
3045	III	36	Male	No	squamoid	0.534161
3046	III	43	Female	No	bronchioid	0.820188
3047	I	59	Female	No	bronchioid	0.421186
3048	I	71	Male	No	bronchioid	0.742133
3049	I	58	Female	No	bronchioid	0.586593
3050	II	65	Male	Yes	squamoid	0.573209
3056	III	58	Female	No	bronchioid	0.502169
4002	II	62	Male	Yes	squamoid	0.744881
5003	I	69	Male	Yes	bronchioid	0.611396
5020	II	56	Male	Yes	squamoid	0.4855
5022	I	59	Male	Yes	bronchioid	0.454398
5023	I	54	Male	No	squamoid	0.552677
6048	I	53	Male	Yes	bronchioid	0.421155
6051	I	56	Male	Yes	bronchioid	0.390642
6060	III	52	Female	No	bronchioid	0.532794
6061	I	70	Female	No	bronchioid	0.512455
6062	I	74	Female	No	bronchioid	0.412446
301	III	62	Male	Yes	bronchioid	0.654355
327	II	50	Male	Yes	neuroendocrine	0.717204
338	I	61	Male	Yes	neuroendocrine	0.424486
344	II	64	Male	Yes	neuroendocrine	0.764555
352	I	59	Male	Yes	neuroendocrine	0.452074
354	I	66	Male	Yes	bronchioid	0.577088
356	I	58	Male	Yes	squamoid	0.501988
358	I	72	Male	Yes	neuroendocrine	0.486803
359	I	64	Male	Yes	bronchioid	0.398278
360	II	58	Male	Yes	bronchioid	0.616222
366	I	62	Male	Yes	bronchioid	0.592662
367	III	77	Male	Yes	bronchioid	0.478198
374	I	68	Male	Yes	bronchioid	0.52148
375	II	66	Male	Yes	neuroendocrine	0.69059
378	III	73	NA	Yes	squamoid	0.819923
379	I	62	Male	Yes	bronchioid	0.561771
381	III	59	Male	Yes	squamoid	0.393574
385	III	49	Male	Yes	squamoid	0.541113
386	I	50	Male	Yes	bronchioid	0.574316
410	II	77	Male	Yes	squamoid	0.664593
411	I	64	Male	Yes	squamoid	0.377189
412	II	50	Male	Yes	bronchioid	0.454382
413	I	59	Male	Yes	bronchioid	0.538244
414	III	66	Male	Yes	bronchioid	0.565112
415	II	53	Male	Yes	neuroendocrine	0.306569
416	III	59	Male	Yes	bronchioid	0.515077
418	I	69	Male	Yes	neuroendocrine	0.731536
419	I	52	Male	Yes	bronchioid	0.296109
422	II	63	Male	Yes	squamoid	0.405852
424	III	55	Male	Yes	squamoid	0.468269
425	III	65	Male	Yes	squamoid	0.626281
427	I	66	Male	Yes	squamoid	0.42372
428	III	47	Male	Yes	bronchioid	0.768127
430	III	61	Male	Yes	bronchioid	0.64823
431	I	72	Male	No	bronchioid	0.65111
437	IV	60	Male	No	squamoid	0.669341
438	III	66	Male	No	bronchioid	0.604836
440	III	77	Female	No	bronchioid	0.578875
446	I	67	Female	No	bronchioid	0.594829
451	I	71	Female	No	bronchioid	0.475993
453	I	60	Female	No	bronchioid	0.687917
454	III	59	Female	No	bronchioid	0.574087
457	I	67	Female	No	squamoid	0.516059
459	I	69	Female	No	bronchioid	0.403626
462	II	61	Male	No	bronchioid	0.634965
465	II	45	Female	No	bronchioid	0.80479
466	I	55	Female	No	bronchioid	0.511584
473	I	60	Female	No	bronchioid	0.526722
475	I	48	Female	No	bronchioid	0.512581
478	II	67	Female	No	bronchioid	0.567316
480	I	69	Female	No	bronchioid	0.53367
481	II	61	Female	No	bronchioid	0.574679
483	IV	71	Female	No	bronchioid	0.678096
487	IV	58	Female	No	bronchioid	0.824439
488	III	78	Female	No	bronchioid	0.442934
490	I	64	Female	No	bronchioid	0.717666
309	I	58	Male	Yes	bronchioid	0.682797
1008	I	39	Male	Yes	bronchioid	0.69227
332	II	65	NA	Yes	neuroendocrine	0.734268
334	I	80	Male	Yes	bronchioid	0.36913
302	I	68	Male	Yes	squamoid	0.657032
6021	IV	56	Male	Yes	bronchioid	0.472681
5012	I	57	Male	Yes	neuroendocrine	0.388814
6029	III	61	Male	Yes	squamoid	0.592679

## Sheet: Table S2_36384096
Sample	time	event	Stage	Age	Gender	cluster	protein_cluster	Race	subtypePred	ppred	Estimate_purity
AP.JK59	1070	1	IA	51	Female	neuroendocrine	neuroendocrine	White	TRU	ProxProlif	0.407578
AP.7KJ6	1825	0	IA	64	Female	bronchioid	bronchioid	White	ProxInflam	ProxInflam	0.332199
AP.KXUT	724	1	IB	79	Female	bronchioid	bronchioid	White	TRU	TRU	0.530501
AP.E98M	1825	0	IA	69	Female	bronchioid	bronchioid	White	TRU	TRU	0.646555
AP.B2SL	1825	0	IB	54	Male	neuroendocrine	neuroendocrine	White	ProxProlif	ProxProlif	0.778836
AP.QUHC	1825	0	IIB	56	Female	squamoid	squamoid	White	TRU	ProxProlif	0.634022
AP.QAHT	1526	0	NA	46	Male	bronchioid	bronchioid	Black	TRU	TRU	0.453538
AP.9UHJ	484	1	IIA	79	Male	neuroendocrine	neuroendocrine	White	ProxInflam	ProxProlif	0.386811
AP.NMZS	NA	NA	IA	51	Female	bronchioid	bronchioid	White	TRU	TRU	0.53872
AP.9D3B	1153	1	IB	59	Female	bronchioid	bronchioid	White	TRU	TRU	0.747153
AP.F595	1825	0	IA	74	Male	squamoid	squamoid	White	ProxInflam	ProxProlif	0.711675
AP.EFHT	1825	0	IA	66	Female	bronchioid	bronchioid	White	ProxInflam	ProxInflam	0.360417
AP.DT88	310	1	IIB	84	Male	squamoid	squamoid	White	ProxProlif	TRU	0.629771
AP.JDN4	780	1	IA	56	Male	bronchioid	bronchioid	White	ProxInflam	ProxInflam	0.318544
AP.W455	1760	0	IA	64	Male	bronchioid	bronchioid	White	TRU	TRU	0.468544
AP.JBET	1798	0	IIA	82	Male	bronchioid	bronchioid	White	TRU	TRU	0.630219
AP.E7CU	8	1	IIA	70	Male	bronchioid	bronchioid	Black	ProxProlif	ProxProlif	0.621373
AP.3FY5	279	1	IIB	61	Female	squamoid	squamoid	Black	ProxProlif	ProxProlif	0.628803
AP.4M7L	1638	0	IIA	78	Female	bronchioid	bronchioid	Black	TRU	TRU	0.67485
AP.ZLDH	898	1	IA	71	Male	bronchioid	bronchioid	White	ProxInflam	ProxInflam	0.452878
AP.RQNH	1799	0	IA	66	Female	squamoid	squamoid	White	ProxInflam	ProxInflam	0.634809
AP.WTXJ	1053	1	IIIA	62	Male	bronchioid	bronchioid	White	ProxProlif	ProxInflam	0.715933
AP.5MX6	1570	0	IIIA	49	Female	squamoid	squamoid	White	ProxProlif	ProxProlif	0.688335
AP.K24D	141	1	IIIA	71	Female	bronchioid	bronchioid	White	ProxInflam	TRU	0.315678
AP.QD4Q	1022	0	IA	52	Female	bronchioid	bronchioid	White	ProxInflam	ProxInflam	0.252278
AP.SS2L	1825	0	IIA	64	Female	bronchioid	bronchioid	White	ProxProlif	ProxProlif	0.760554
AP.MJ52	1806	0	IIB	71	Female	squamoid	squamoid	White	ProxInflam	ProxInflam	0.527077
AP.AGZG	1753	0	IA	71	Male	bronchioid	bronchioid	White	TRU	TRU	0.495345
AP.B9CH	1825	0	IIA	55	Female	bronchioid	bronchioid	White	TRU	TRU	0.829192
AP.XCJX	634	1	IIA	80	Male	bronchioid	bronchioid	White	TRU	TRU	0.433393
AP.SJVE	240	0	IIA	59	Male	bronchioid	bronchioid	White	TRU	TRU	0.328125
AP.FX68	992	1	IIB	66	Male	neuroendocrine	neuroendocrine	Black	ProxProlif	ProxProlif	0.823001
AP.D9X4	1825	0	IA	72	Female	bronchioid	bronchioid	White	TRU	TRU	0.46517
AP.WDKZ	467	1	IIIA	64	Male	squamoid	squamoid	White	ProxProlif	TRU	0.543835
AP.RA2G	1825	0	IB	83	Female	bronchioid	bronchioid	White	TRU	TRU	0.59518
AP.U8MP	1314	0	IIA	69	Male	bronchioid	bronchioid	White	ProxProlif	ProxProlif	0.581577
AP.HKYN	1759	0	IIIA	72	Male	bronchioid	bronchioid	White	TRU	TRU	0.622229
AP.TBFQ	1825	0	IA	80	Female	bronchioid	bronchioid	White	ProxInflam	ProxInflam	0.466986
AP.RBLG	984	1	IA	59	Female	squamoid	squamoid	Black	ProxProlif	ProxProlif	0.569515
AP.DMUM	1505	1	IIB	79	Male	bronchioid	bronchioid	White	ProxProlif	ProxProlif	0.686756
AP.352Q	658	1	IIIA	66	Male	squamoid	squamoid	White	ProxProlif	ProxProlif	0.923351
AP.2E8Q	1205	0	IA	47	Female	bronchioid	bronchioid	White	ProxInflam	ProxInflam	0.689438
AP.EZEX	913	1	IIB	68	Male	neuroendocrine	neuroendocrine	White	ProxProlif	ProxProlif	0.83731
AP.8PRJ	898	1	NA	75	Female	bronchioid	bronchioid	White	ProxInflam	ProxInflam	0.459984
AP.D35H	811	1	IA	58	Male	squamoid	neuroendocrine	White	ProxProlif	TRU	0.580089
AP.HMFR	1825	0	IIIA	68	Female	neuroendocrine	neuroendocrine	White	ProxProlif	ProxProlif	0.612724
AP.A5NG	725	1	IA	75	Male	squamoid	squamoid	White	ProxProlif	ProxProlif	0.512503
AP.9LNA	1810	0	IA	74	Female	bronchioid	bronchioid	White	TRU	ProxInflam	0.497479
AP.52RG	1047	1	IIA	65	Female	bronchioid	bronchioid	White	TRU	TRU	0.480363
AP.MGNN	1825	0	IIB	48	Female	squamoid	squamoid	White	ProxInflam	ProxInflam	0.536537
AP.67ZV	1460	1	IB	77	Male	bronchioid	squamoid	White	ProxProlif	ProxInflam	0.541951
AP.KX5B	1114	1	IIA	85	Male	bronchioid	bronchioid	White	TRU	TRU	0.533068
AP.6EWG	1782	0	IA	57	Male	bronchioid	bronchioid	White	ProxInflam	ProxInflam	0.472312
AP.XSR5	1066	1	IA	81	Female	neuroendocrine	neuroendocrine	White	ProxProlif	ProxProlif	0.811444
AP.4LRG	1825	0	IA	58	Male	bronchioid	bronchioid	White	ProxInflam	ProxInflam	0.378027
AP.N8FG	60	0	IA	70	Male	bronchioid	bronchioid	White	TRU	TRU	0.311504
AP.5L2V	398	1	IIA	61	Male	neuroendocrine	neuroendocrine	White	ProxProlif	ProxProlif	0.735218
AP.HFEA	1825	0	IB	48	Female	bronchioid	bronchioid	White	ProxInflam	ProxInflam	0.225961
AP.AJWE	1184	1	IIIA	59	Male	squamoid	squamoid	White	ProxInflam	ProxProlif	0.439532
AP.UG7J	1753	0	IA	70	Male	bronchioid	squamoid	White	ProxInflam	ProxInflam	0.453156
AP.5JDU	1454	0	IA	67	Female	squamoid	squamoid	White	ProxProlif	ProxProlif	0.640406
AP.3336	1713	0	IA	79	Male	bronchioid	bronchioid	White	TRU	TRU	0.579048
AP.CT3G	1617	0	IB	71	Female	bronchioid	bronchioid	White	TRU	TRU	0.715585
AP.2XNK	1825	0	IA	50	Male	bronchioid	neuroendocrine	White	ProxProlif	ProxProlif	0.827884
AP.JKPX	1484	0	IIIA	61	Female	bronchioid	bronchioid	White	ProxInflam	ProxProlif	0.656418
AP.AAFC	1722	0	IA	75	Female	bronchioid	bronchioid	White	TRU	TRU	0.633759
AP.XVLY	1544	0	IIIA	58	Male	neuroendocrine	neuroendocrine	White	ProxProlif	ProxInflam	0.441355
AP.62LT	1663	0	IB	41	Female	bronchioid	bronchioid	White	TRU	TRU	0.284272
AP.V6UJ	1821	0	IB	73	Male	bronchioid	neuroendocrine	White	ProxInflam	ProxInflam	0.445082
AP.7GDN	1810	0	IA	79	Male	bronchioid	neuroendocrine	White	ProxProlif	ProxProlif	0.843142
AP.KGMR	1221	1	IIA	67	Male	squamoid	neuroendocrine	White	ProxInflam	ProxInflam	0.338153
AP.G79N	821	1	IIIA	83	Male	bronchioid	bronchioid	White	ProxInflam	ProxInflam	0.496748
AP.YTZ8	1825	0	IA	60	Male	neuroendocrine	bronchioid	White	ProxProlif	TRU	0.626807
AP.VLXG	1825	0	IIIA	54	Female	bronchioid	bronchioid	White	ProxInflam	ProxInflam	0.577529
AP.94ED	23	1	IIA	63	Male	bronchioid	bronchioid	White	ProxInflam	ProxInflam	0.645751
AP.WPAM	456	1	IIA	63	Female	neuroendocrine	neuroendocrine	White	ProxProlif	ProxProlif	0.881575
AP.MAZ4	800	1	IIIA	70	Female	squamoid	squamoid	Black	ProxProlif	ProxProlif	0.526171
AP.DN2V	716	1	IIIA	76	Male	bronchioid	bronchioid	White	ProxInflam	ProxInflam	0.563056
AP.HML4	1711	0	IA	68	Female	bronchioid	bronchioid	White	TRU	TRU	0.612559
AP.LWHD	4	1	IA	72	Male	bronchioid	bronchioid	White	TRU	TRU	0.572372
AP.DM87	1825	0	IB	55	Female	bronchioid	bronchioid	White	TRU	ProxInflam	0.574198
AP.9PXS	1825	0	IB	68	Female	neuroendocrine	neuroendocrine	White	ProxProlif	ProxProlif	0.83227
AP.8MWD	1825	0	IIIA	65	Male	neuroendocrine	squamoid	White	ProxProlif	ProxProlif	0.624139
AP.EPNF	1825	0	IA	74	Female	bronchioid	bronchioid	White	TRU	TRU	0.579878
AP.YF3B	1701	1	IB	59	Female	squamoid	squamoid	White	ProxInflam	ProxInflam	0.356436
AP.4HAU	1712	0	IB	77	Male	bronchioid	squamoid	White	ProxProlif	ProxProlif	0.769173
AP.27JZ	1283	1	IIA	68	Male	bronchioid	bronchioid	White	TRU	TRU	0.489173

## Sheet: Table S2_GSE68465
Sample	time	event	Stage	Age	Gender	Smoking	cluster	Histological_grade	Chemotherapy	BestCall	Estimate_purity
GSM1672283	64.8	1	1B/2A	74	Female	Yes	bronchioid	Well	No	Inflammatory	0.555664
GSM1672285	33.9	1	1B/2A	59	Female	Yes	squamoid	Moderate	No	Inflammatory	0.532125
GSM1672290	50.2	1	2B	66	Male	Yes	bronchioid	Moderate	No	IFN gamma dominant	0.511564
GSM1672294	48.8	1	1B/2A	66	Female	Yes	bronchioid	Poor	No	IFN gamma dominant	0.37893
GSM1672295	66.6	0	1B/2A	61	Female	Yes	bronchioid	Moderate	Yes	Lymphocyte depleted	0.731406
GSM1672296	10.1	1	1B/2A	68	Female	Yes	neuroendocrine	Moderate	No	Wound healing	0.855154
GSM1672297	8.7	1	1B/2A	48	Female	Yes	squamoid	Poor	Yes	Wound healing	0.635082
GSM1672299	132.2	0	1B/2A	50	Female	Yes	squamoid	Poor	No	IFN gamma dominant	0.499381
GSM1672301	43.8	1	1B/2A	72	Female	Yes	bronchioid	Well	No	Inflammatory	0.627533
GSM1672302	5.9	1	3A	72	Female	Yes	neuroendocrine	Poor	No	Lymphocyte depleted	0.615986
GSM1672303	2.4	1	3A	71	Male	Yes	squamoid	Moderate	No	Lymphocyte depleted	0.745277
GSM1672304	17.6	1	3A	58	Male	Yes	squamoid	Poor	Yes	IFN gamma dominant	0.466892
GSM1672305	16.3	1	3A	63	Male	Yes	neuroendocrine	Moderate	Yes	Wound healing	0.588924
GSM1672306	29.6	1	3A	74	Female	Yes	squamoid	Poor	Yes	Inflammatory	0.427775
GSM1672307	81.2	1	1B/2A	76	Male	Yes	bronchioid	Poor	No	IFN gamma dominant	0.703006
GSM1672309	92.6	1	3A	71	Male	Yes	neuroendocrine	Moderate	No	Lymphocyte depleted	0.687936
GSM1672310	4	1	2B	45	Female	Yes	bronchioid	Poor	No	Wound healing	0.664383
GSM1672311	16.8	1	3A	78	Female	Yes	squamoid	Poor	Yes	IFN gamma dominant	0.297541
GSM1672312	62	0	1B/2A	75	Male	Yes	bronchioid	Moderate	No	Inflammatory	0.447799
GSM1672313	62.3	1	1B/2A	61	Male	Yes	bronchioid	Poor	Yes	Wound healing	0.749738
GSM1672316	18.6	1	1B/2A	73	Male	Yes	bronchioid	Well	No	Wound healing	0.730222
GSM1672317	45.8	1	1B/2A	51	Male	NA	bronchioid	Poor	No	IFN gamma dominant	0.65199
GSM1672318	20.6	1	1B/2A	63	Female	Yes	squamoid	Moderate	Yes	Wound healing	0.60458
GSM1672321	70.5	1	2A	56	Male	Yes	bronchioid	Moderate	No	Inflammatory	0.396597
GSM1672324	16.9	1	3A	62	Male	Yes	squamoid	Moderate	No	Lymphocyte depleted	0.465751
GSM1672326	103.4	0	1B/2A	65	Male	Yes	bronchioid	Moderate	No	Lymphocyte depleted	0.484156
GSM1672327	117.6	0	1B/2A	73	Female	Yes	bronchioid	Moderate	Yes	Inflammatory	0.470722
GSM1672328	115.8	1	2	52	Female	Yes	bronchioid	Moderate	Yes	Lymphocyte depleted	0.536909
GSM1672332	153.9	0	1B/2A	59	Female	NA	neuroendocrine	Moderate	No	Inflammatory	0.53218
GSM1672334	63.8	0	1B/2A	63	Male	Yes	bronchioid	Poor	No	Inflammatory	0.451579
GSM1672341	28.2	1	3A	64	Male	Yes	squamoid	Moderate	No	Wound healing	0.473402
GSM1672342	7.2	1	3A	69	Male	Yes	bronchioid	Moderate	No	Inflammatory	0.43742
GSM1672345	101.2	0	1B/2A	60	Male	Yes	neuroendocrine	Moderate	No	Inflammatory	0.45315
GSM1672347	14.9	1	3A	77	Male	Yes	bronchioid	Moderate	NA	IFN gamma dominant	0.571399
GSM1672348	9.6	1	3A	56	Male	Yes	bronchioid	Moderate	No	Inflammatory	0.449276
GSM1672350	62.4	0	1B/2A	51	Male	Yes	squamoid	Moderate	No	IFN gamma dominant	0.479712
GSM1672351	64.3	0	2	63	Female	Yes	bronchioid	Moderate	No	IFN gamma dominant	0.506142
GSM1672353	22.3	1	2A	60	Female	Yes	bronchioid	Moderate	No	IFN gamma dominant	0.741093
GSM1672354	67.9	1	2	58	Male	Yes	bronchioid	Well	No	Inflammatory	0.639257
GSM1672356	22.7	1	2	52	Female	Yes	neuroendocrine	Poor	Yes	IFN gamma dominant	0.723724
GSM1672357	32.9	0	2	81	Female	Yes	bronchioid	Moderate	Yes	Inflammatory	0.602237
GSM1672360	96.1	1	2A	60	Female	Yes	bronchioid	Moderate	Yes	Lymphocyte depleted	0.563447
GSM1672362	12.5	1	2	68	Male	Yes	neuroendocrine	Well	No	Wound healing	0.802383
GSM1672364	107.5	0	2A	65	Female	Yes	bronchioid	Poor	No	Lymphocyte depleted	0.6063
GSM1672365	53.7	0	1B/2A	63	Male	Yes	bronchioid	Poor	No	Inflammatory	0.683388
GSM1672368	21	1	2	54	Male	Yes	neuroendocrine	Moderate	No	Wound healing	0.834997
GSM1672369	7.3	1	2A	78	Male	Yes	bronchioid	Moderate	No	Inflammatory	0.578275
GSM1672370	159.9	0	1B/2A	66	Male	NA	bronchioid	Moderate	No	Wound healing	0.697903
GSM1672373	53.6	0	1B/2A	69	Female	Yes	bronchioid	Well	Yes	Inflammatory	0.535046
GSM1672374	23.2	0	3A	59	Male	Yes	bronchioid	Moderate	No	Lymphocyte depleted	0.399736
GSM1672375	47.27	0	1B/2A	76	Female	NA	bronchioid	Poor	No	IFN gamma dominant	0.699194
GSM1672376	59.11	1	1B/2A	70	Male	NA	neuroendocrine	Moderate	No	IFN gamma dominant	0.466363
GSM1672377	51.58	0	1B/2A	58	Male	NA	bronchioid	Poor	No	Wound healing	0.897262
GSM1672378	36.25	1	1B/2A	48	Female	NA	neuroendocrine	Moderate	No	Inflammatory	0.507212
GSM1672381	9.74	1	3A	82	Male	NA	bronchioid	Well	No	Inflammatory	0.645604
GSM1672383	51.81	0	1B/2A	58	Male	NA	squamoid	Moderate	No	IFN gamma dominant	0.455473
GSM1672385	6.38	1	2	78	Male	NA	bronchioid	Moderate	No	Inflammatory	0.492844
GSM1672386	69.01	1	1B/2A	57	Female	NA	bronchioid	Moderate	No	Wound healing	0.452399
GSM1672390	56.35	0	1B/2A	73	Male	NA	bronchioid	Poor	No	Lymphocyte depleted	0.706298
GSM1672396	66.74	0	1B/2A	76	Female	NA	bronchioid	Moderate	No	IFN gamma dominant	0.465542
GSM1672399	31.28	1	3A	60	Female	NA	bronchioid	Poor	No	IFN gamma dominant	0.585661
GSM1672402	12.63	1	3A	55	Female	NA	squamoid	Poor	No	IFN gamma dominant	0.57278
GSM1672403	77.89	0	1B/2A	64	Female	NA	bronchioid	Poor	No	IFN gamma dominant	0.360845
GSM1672404	11.18	0	1B/2A	53	Female	NA	squamoid	Poor	No	IFN gamma dominant	0.396721
GSM1672405	30.53	0	3A	77	Female	NA	bronchioid	Well	No	Lymphocyte depleted	0.534879
GSM1672407	11.68	1	1B/2A	67	Male	NA	squamoid	Moderate	No	Inflammatory	0.55237
GSM1672409	31.94	1	1B/2A	72	Female	NA	bronchioid	Well	No	Inflammatory	0.574102
GSM1672411	8.85	1	2A	52	Female	NA	neuroendocrine	Poor	No	IFN gamma dominant	0.584505
GSM1672413	90.07	0	1B/2A	33	Female	NA	squamoid	Well	No	Inflammatory	0.40267
GSM1672414	24.97	1	3A	59	Male	NA	squamoid	Poor	No	Wound healing	0.493013
GSM1672417	2.7	1	3A	74	Male	NA	squamoid	Poor	NA	IFN gamma dominant	0.473318
GSM1672418	96	1	1B/2A	46	Male	NA	squamoid	Moderate	NA	Inflammatory	0.639444
GSM1672419	66.1	1	3A	67	Male	NA	bronchioid	Moderate	NA	Inflammatory	0.298809
GSM1672420	68.6	1	1B/2A	60	Male	NA	bronchioid	Poor	NA	Inflammatory	0.407229
GSM1672421	48	1	1B/2A	75	Male	NA	neuroendocrine	Moderate	NA	Wound healing	0.630466
GSM1672422	16	1	3A	64	Male	No	squamoid	Poor	Yes	IFN gamma dominant	0.698435
GSM1672423	72	0	1B/2A	62	Male	Yes	neuroendocrine	Moderate	Yes	IFN gamma dominant	0.451437
GSM1672425	52	1	3A	67	Male	Yes	bronchioid	Poor	No	Inflammatory	0.604474
GSM1672426	39	1	2	56	Female	No	neuroendocrine	Poor	Yes	IFN gamma dominant	0.599597
GSM1672427	66	0	2A	57	Male	Yes	bronchioid	Moderate	No	Inflammatory	0.46242
GSM1672428	44	0	1B/2A	81	Female	Yes	bronchioid	Moderate	No	Inflammatory	0.553204
GSM1672430	75	0	3A	73	Female	Yes	bronchioid	Moderate	No	Inflammatory	0.529327
GSM1672433	43	0	3A	71	Male	Yes	bronchioid	Poor	Yes	IFN gamma dominant	0.738893
GSM1672435	40	1	1B/2A	68	Male	Yes	bronchioid	Poor	No	IFN gamma dominant	0.63966
GSM1672436	21	1	3A	48	Female	Yes	bronchioid	Poor	No	IFN gamma dominant	0.712893
GSM1672437	29	1	1B/2A	82	Female	Yes	neuroendocrine	Poor	Yes	Wound healing	0.665968
GSM1672438	26	1	3A	64	Male	Yes	bronchioid	Poor	Yes	IFN gamma dominant	0.596596
GSM1672439	77	0	1B/2A	68	Male	Yes	squamoid	Poor	No	Wound healing	0.802852
GSM1672442	14	1	3A	52	Female	No	squamoid	Poor	Yes	Inflammatory	0.415677
GSM1672443	33	0	1B/2A	62	Male	Yes	bronchioid	Moderate	No	Inflammatory	0.728469
GSM1672444	85	0	1B/2A	51	Male	No	squamoid	Poor	No	Wound healing	0.794592
GSM1672445	66	0	1B/2A	62	Male	Yes	bronchioid	Well	No	Inflammatory	0.78723
GSM1672447	91	0	1B/2A	65	Male	No	bronchioid	Poor	No	Wound healing	0.728993
GSM1672448	68	1	1B/2A	74	Male	Yes	bronchioid	Moderate	Yes	Inflammatory	0.533057
GSM1672449	33	0	2	55	Female	Yes	squamoid	NA	No	IFN gamma dominant	0.305765
GSM1672450	24	1	3A	54	Male	Yes	bronchioid	Poor	Yes	Inflammatory	0.565696
GSM1672452	114	1	3A	64	Female	Yes	bronchioid	Poor	Yes	Wound healing	0.81435
GSM1672453	4	1	3A	58	Female	Yes	bronchioid	Poor	No	Inflammatory	0.50605
GSM1672454	20	1	2	70	Male	Yes	squamoid	Moderate	Yes	IFN gamma dominant	0.802189
GSM1672455	52	1	3A	57	Female	Yes	neuroendocrine	NA	Yes	Wound healing	0.7303
GSM1672456	93	0	2	67	Female	Yes	squamoid	Moderate	Yes	IFN gamma dominant	0.653681
GSM1672457	14	1	1B/2A	74	Female	No	squamoid	Poor	No	Wound healing	0.78704
GSM1672458	100	0	2	59	Female	Yes	bronchioid	Poor	Yes	Inflammatory	0.477075
GSM1672459	33	0	1B/2A	66	Female	Yes	bronchioid	Well	No	Inflammatory	0.722177
GSM1672460	32	1	2A	67	Male	Yes	bronchioid	Moderate	Yes	Inflammatory	0.733275
GSM1672462	50	0	1B/2A	64	Male	Yes	neuroendocrine	Moderate	No	Inflammatory	0.883761
GSM1672463	15	1	1B/2A	59	Female	Yes	squamoid	Poor	No	IFN gamma dominant	0.644895
GSM1672464	37	0	1B/2A	76	Female	Yes	bronchioid	Moderate	No	Inflammatory	0.587798
GSM1672465	54	0	1B/2A	82	Female	Yes	bronchioid	Well	No	Inflammatory	0.647917
GSM1672467	38	0	1B/2A	65	Male	No	neuroendocrine	NA	No	IFN gamma dominant	0.601185
GSM1672468	115	0	3A	49	Female	Yes	bronchioid	Moderate	No	Inflammatory	0.830741
GSM1672469	36	0	3A	71	Female	Yes	bronchioid	Moderate	No	Inflammatory	0.390391
GSM1672471	19	1	3A	75	Male	Yes	bronchioid	Well	Yes	IFN gamma dominant	0.569888
GSM1672473	204	1	1B/2A	74	Female	Yes	bronchioid	Poor	No	Wound healing	0.603545
GSM1672474	50	0	2	51	Female	Yes	bronchioid	Moderate	No	Inflammatory	0.79353
GSM1672476	42	1	3A	50	Female	Yes	bronchioid	Poor	Yes	Inflammatory	0.464101
GSM1672477	60	0	1B/2A	69	Female	Yes	neuroendocrine	Poor	No	Wound healing	0.823786
GSM1672478	26	0	2	63	Female	No	neuroendocrine	Moderate	No	IFN gamma dominant	0.645683
GSM1672479	62	1	1B/2A	76	Female	Yes	squamoid	Poor	No	IFN gamma dominant	0.376535
GSM1672480	22	0	2	72	Female	Yes	bronchioid	Poor	No	Inflammatory	0.663906
GSM1672484	52	1	1B/2A	61	Female	Yes	bronchioid	Poor	Yes	IFN gamma dominant	0.589623
GSM1672486	15	1	2	72	Female	Yes	neuroendocrine	Poor	No	Wound healing	0.634343
GSM1672487	20	1	2	53	Female	Yes	bronchioid	Poor	No	Wound healing	0.795654
GSM1672488	41	0	1B/2A	61	Male	Yes	bronchioid	Moderate	No	Wound healing	0.716111
GSM1672489	25	1	3A	66	Male	NA	neuroendocrine	Moderate	Yes	Wound healing	0.814808
GSM1672490	42	0	2	74	Female	No	neuroendocrine	Poor	No	Inflammatory	0.592257
GSM1672491	51	1	3A	48	Female	Yes	bronchioid	Moderate	Yes	Lymphocyte depleted	0.783812
GSM1672492	50	0	1B/2A	65	Female	No	squamoid	Moderate	No	Wound healing	0.651018
GSM1672493	57	1	1B/2A	70	Female	Yes	neuroendocrine	Moderate	Yes	Inflammatory	0.56563
GSM1672494	13	1	1B/2A	79	Female	No	neuroendocrine	Poor	Yes	Wound healing	0.523748
GSM1672495	78	1	1B/2A	67	Male	Yes	bronchioid	Well	Yes	Inflammatory	0.743016
GSM1672496	48	0	1B/2A	77	Male	Yes	bronchioid	Moderate	No	Inflammatory	0.722645
GSM1672497	33	1	3A	63	Female	Yes	bronchioid	Moderate	No	Inflammatory	0.436402
GSM1672498	37	0	1B/2A	76	Female	Yes	bronchioid	Poor	No	Inflammatory	0.336151
GSM1672499	17	1	2	72	Male	Yes	neuroendocrine	Well	Yes	Inflammatory	0.622482
GSM1672503	50	0	2	74	Female	Yes	bronchioid	Moderate	Yes	Inflammatory	0.769265
GSM1672505	42	0	1B/2A	62	Female	Yes	bronchioid	Poor	No	Inflammatory	0.424698
GSM1672509	38	0	3A	38	Female	Yes	bronchioid	Poor	No	Inflammatory	0.661057
GSM1672510	43	0	2	72	Female	Yes	squamoid	Poor	No	IFN gamma dominant	0.51793
GSM1672512	17	1	3A	65	Female	Yes	bronchioid	Poor	Yes	Lymphocyte depleted	0.547583
GSM1672513	36	0	1B/2A	54	Female	Yes	bronchioid	Moderate	No	Wound healing	0.716069
GSM1672514	10	1	2A	79	Female	Yes	bronchioid	Poor	No	Inflammatory	0.555026
GSM1672515	23	1	1B/2A	61	Male	Yes	bronchioid	Poor	Yes	IFN gamma dominant	0.875831
GSM1672516	62	0	1B/2A	74	Male	Yes	neuroendocrine	Moderate	No	Inflammatory	0.834667
GSM1672517	85	0	2B	80	Female	Yes	bronchioid	Moderate	Yes	IFN gamma dominant	0.662049
GSM1672518	47	1	1B/2A	68	Female	Yes	squamoid	Poor	Yes	Wound healing	0.692312
GSM1672520	57	0	2	58	Female	Yes	bronchioid	Moderate	Yes	IFN gamma dominant	0.743511
GSM1672521	43	0	1B/2A	57	Male	Yes	bronchioid	Moderate	No	Inflammatory	0.529432
GSM1672522	41	0	1B/2A	57	Female	Yes	bronchioid	Well	No	Inflammatory	0.461484
GSM1672523	43	0	1B/2A	67	Male	Yes	bronchioid	Poor	No	Inflammatory	0.624549
GSM1672524	32	0	2	75	Female	Yes	squamoid	Poor	No	Wound healing	0.814571
GSM1672526	107	0	1B/2A	59	Male	Yes	bronchioid	Well	No	Inflammatory	0.591006
GSM1672527	25	1	1B/2A	75	Male	Yes	bronchioid	Well	No	Inflammatory	0.715737
GSM1672528	96	0	1B/2A	60	Female	Yes	neuroendocrine	Poor	No	Inflammatory	0.42345
GSM1672529	98	0	1B/2A	41	Female	Yes	bronchioid	Poor	No	IFN gamma dominant	0.532691
GSM1672531	90	0	1B/2A	60	Female	Yes	bronchioid	Moderate	Yes	Inflammatory	0.366981
GSM1672532	40	0	2A	43	Male	Yes	bronchioid	Poor	No	Inflammatory	0.475445
GSM1672533	71	1	1B/2A	54	Male	Yes	bronchioid	Well	Yes	Inflammatory	0.487018
GSM1672534	9	1	2	52	Female	Yes	bronchioid	Well	Yes	IFN gamma dominant	0.509107
GSM1672535	110	0	1B/2A	47	Male	Yes	neuroendocrine	Moderate	Yes	Inflammatory	0.396769
GSM1672536	110	0	1B/2A	55	Female	Yes	bronchioid	Poor	No	Inflammatory	0.487556
GSM1672537	6	1	1B/2A	66	Female	Yes	squamoid	Poor	Yes	IFN gamma dominant	0.590216
GSM1672538	95	1	2A	70	Female	Yes	neuroendocrine	Poor	Yes	Inflammatory	0.570649
GSM1672539	38	1	1B/2A	68	Male	Yes	bronchioid	Moderate	Yes	IFN gamma dominant	0.683612
GSM1672540	9	1	1B/2A	61	Female	Yes	squamoid	Poor	No	Wound healing	0.550496
GSM1672541	87	0	1B/2A	60	Female	Yes	neuroendocrine	Moderate	No	Wound healing	0.752843
GSM1672542	88	0	1B/2A	35	Male	Yes	bronchioid	Well	No	Inflammatory	0.575149
GSM1672543	74	0	2	53	Female	Yes	bronchioid	Moderate	No	IFN gamma dominant	0.502977
GSM1672544	8	1	2	54	Male	Yes	squamoid	Moderate	Yes	Wound healing	0.640385
GSM1672545	59	0	1B/2A	73	Female	Yes	bronchioid	Well	Yes	Lymphocyte depleted	0.816043
GSM1672546	55	0	1B/2A	38	Female	Yes	bronchioid	Poor	Yes	Wound healing	0.680258
GSM1672547	36	0	1B/2A	58	Male	Yes	bronchioid	Poor	No	IFN gamma dominant	0.563626
GSM1672548	15	1	1B/2A	65	Male	Yes	bronchioid	Moderate	Yes	Inflammatory	0.397943
GSM1672549	85	0	1B/2A	66	Female	Yes	squamoid	Poor	Yes	IFN gamma dominant	0.567322
GSM1672550	9	1	2	66	Male	Yes	neuroendocrine	Poor	No	Wound healing	0.863756
GSM1672551	11	1	2	76	Male	Yes	squamoid	Poor	No	IFN gamma dominant	0.523708
GSM1672552	79	1	1B/2A	53	Male	Yes	bronchioid	Poor	Yes	Inflammatory	0.343561
GSM1672553	105	0	1B/2A	60	Male	Yes	bronchioid	Moderate	No	IFN gamma dominant	0.654238
GSM1672554	97	0	1B/2A	40	Female	Yes	squamoid	Poor	Yes	IFN gamma dominant	0.461609
GSM1672555	4	1	2	67	Male	Yes	neuroendocrine	Poor	No	Wound healing	0.645584
GSM1672556	36	1	1B/2A	62	Male	Yes	neuroendocrine	Well	Yes	Wound healing	0.709626
GSM1672557	44	1	2A	61	Male	Yes	bronchioid	Well	No	Wound healing	0.81924
GSM1672558	74	1	2	63	Male	Yes	bronchioid	Poor	No	IFN gamma dominant	0.684369
GSM1672559	13	1	2	62	Male	Yes	bronchioid	Poor	Yes	IFN gamma dominant	0.590357
GSM1672560	90	0	1B/2A	51	Female	Yes	neuroendocrine	Poor	Yes	Wound healing	0.594442
GSM1672561	85	0	1B/2A	53	Female	Yes	neuroendocrine	Well	Yes	Inflammatory	0.707286
GSM1672562	71	1	2	56	Female	Yes	bronchioid	Poor	Yes	Wound healing	0.720967
GSM1672563	64	1	2A	61	Male	Yes	neuroendocrine	Moderate	Yes	Inflammatory	0.639746
GSM1672564	65	1	1B/2A	52	Female	Yes	squamoid	Poor	Yes	Wound healing	0.536784
GSM1672565	68	0	1B/2A	60	Male	Yes	neuroendocrine	Poor	Yes	Wound healing	0.669286
GSM1672566	64	0	2	57	Male	Yes	bronchioid	Well	Yes	Inflammatory	0.788713
GSM1672567	63	0	1B/2A	46	Female	NA	bronchioid	Well	No	Wound healing	0.889887
GSM1672568	13	1	2	71	Male	Yes	bronchioid	Moderate	Yes	Wound healing	0.78621
GSM1672569	95	0	2	53	Male	Yes	squamoid	Poor	No	Wound healing	0.750694
GSM1672570	74	0	2A	68	Male	Yes	bronchioid	Poor	No	Inflammatory	0.47822
GSM1672571	57	1	2	72	Female	Yes	bronchioid	Moderate	No	Inflammatory	0.661208
GSM1672573	48	0	2	65	Male	Yes	neuroendocrine	Poor	No	Wound healing	0.695749
GSM1672574	49	0	1B/2A	68	Female	Yes	bronchioid	Moderate	No	Inflammatory	0.526643
GSM1672576	36	0	1B/2A	57	Female	Yes	neuroendocrine	Moderate	No	IFN gamma dominant	0.319018
GSM1672578	37	0	1B/2A	56	Male	Yes	neuroendocrine	Moderate	No	IFN gamma dominant	0.476535
GSM1672581	76	0	1B/2A	61	Male	No	bronchioid	Moderate	NA	Inflammatory	0.655789
GSM1672583	66	0	1B/2A	73	Male	Yes	bronchioid	Poor	NA	Inflammatory	0.582055
GSM1672584	29	1	2	63	Female	No	neuroendocrine	Poor	NA	Wound healing	0.940635
GSM1672585	7	1	1B/2A	72	Male	Yes	neuroendocrine	Poor	No	Wound healing	0.875331
GSM1672588	23	0	1B/2A	64	Male	Yes	bronchioid	Moderate	No	Inflammatory	0.359864
GSM1672589	62	0	1B/2A	40	Female	No	neuroendocrine	Poor	No	Wound healing	0.675092
GSM1672590	7	1	2B	75	Female	Yes	bronchioid	Poor	No	Inflammatory	0.556145
GSM1672591	26	0	1B/2A	60	Male	Yes	bronchioid	Moderate	No	Inflammatory	0.442587
GSM1672592	40	0	1B/2A	58	Female	No	bronchioid	Moderate	No	IFN gamma dominant	0.428542
GSM1672593	30	0	1B/2A	64	Male	Yes	bronchioid	Poor	No	IFN gamma dominant	0.500977
GSM1672594	40	0	1B/2A	62	Male	Yes	bronchioid	Moderate	No	Wound healing	0.695581
GSM1672596	18	1	1B/2A	76	Male	No	bronchioid	Moderate	No	Wound healing	0.644384
GSM1672597	25	1	2A	59	Female	Yes	bronchioid	Poor	No	Inflammatory	0.578746
GSM1672599	12	1	2	74	Male	Yes	squamoid	Poor	No	Inflammatory	0.645038
GSM1672600	32	0	1B/2A	70	Female	Yes	bronchioid	Moderate	No	Inflammatory	0.509764
GSM1672601	105	0	1B/2A	68	Female	Yes	bronchioid	Poor	No	Inflammatory	0.498153
GSM1672602	81	0	2B	69	Male	Yes	neuroendocrine	Poor	No	Wound healing	0.762217
GSM1672603	75	0	1B/2A	75	Male	Yes	bronchioid	Moderate	No	IFN gamma dominant	0.572003
GSM1672604	97	0	1B/2A	64	Male	Yes	bronchioid	Moderate	No	Inflammatory	0.697415
GSM1672605	18	1	2	79	Male	Yes	bronchioid	Moderate	No	Inflammatory	0.675856
GSM1672606	32	1	1B/2A	69	Male	Yes	bronchioid	Poor	No	Wound healing	0.705559
GSM1672607	10	1	2	77	Male	Yes	squamoid	Poor	No	IFN gamma dominant	0.459249
GSM1672608	44.94	1	1B/2A	66	Female	Yes	bronchioid	Poor	No	Lymphocyte depleted	0.701442
GSM1672609	34.76	1	1B/2A	79	Male	Yes	neuroendocrine	Moderate	No	Wound healing	0.724925
GSM1672610	19.84	1	1B/2A	72	Female	Yes	squamoid	Moderate	No	IFN gamma dominant	0.810272
GSM1672612	0.53	1	3A	79	Female	No	bronchioid	Moderate	No	IFN gamma dominant	0.594815
GSM1672613	37.55	1	3A	74	Female	Yes	squamoid	Moderate	No	IFN gamma dominant	0.721397
GSM1672615	123.3	0	1B/2A	40	Male	Yes	neuroendocrine	Moderate	No	Inflammatory	0.552203
GSM1672616	56.8	1	2A	79	Male	Yes	bronchioid	Well	No	Lymphocyte depleted	0.792822
GSM1672617	30.12	1	2B	75	Female	Yes	bronchioid	Poor	No	IFN gamma dominant	0.530471
GSM1672621	20.86	1	1B/2A	49	Male	Yes	bronchioid	Poor	Yes	Wound healing	0.625665
GSM1672622	27.63	1	2	62	Male	Yes	bronchioid	Moderate	Yes	Wound healing	0.89642
GSM1672623	74.18	1	1B/2A	66	Male	Yes	bronchioid	Moderate	No	IFN gamma dominant	0.796892
GSM1672625	41.33	1	2A	62	Female	Yes	squamoid	Moderate	No	IFN gamma dominant	0.518553
GSM1672626	5.65	1	2B	82	Male	Yes	bronchioid	Well	No	Inflammatory	0.593516
GSM1672627	0.43	1	1B/2A	77	Male	Yes	neuroendocrine	Moderate	No	Wound healing	0.874249
GSM1672628	16.56	1	1B/2A	61	Female	No	squamoid	Moderate	Yes	Inflammatory	0.527269
GSM1672630	104.47	0	2	72	Female	Yes	bronchioid	Moderate	No	Wound healing	0.561652
GSM1672631	70.6	1	1B/2A	67	Female	Yes	bronchioid	Moderate	No	IFN gamma dominant	0.722556
GSM1672632	3.52	1	3A	74	Female	Yes	squamoid	Moderate	No	IFN gamma dominant	0.80547
GSM1672633	17.54	1	1B/2A	64	Female	Yes	neuroendocrine	Moderate	No	IFN gamma dominant	0.605678
GSM1672634	27.56	1	1B/2A	65	Female	Yes	squamoid	Moderate	No	Wound healing	0.893022
GSM1672635	16.39	1	2B	76	Male	No	neuroendocrine	Poor	No	IFN gamma dominant	0.7235
GSM1672636	77.7	0	1B/2A	66	Female	Yes	bronchioid	Moderate	No	Wound healing	0.760511
GSM1672638	73.4	0	1B/2A	66	Female	Yes	neuroendocrine	Poor	No	Wound healing	0.627355
GSM1672639	45.24	1	1B/2A	70	Male	Yes	bronchioid	Poor	Yes	IFN gamma dominant	0.681789
GSM1672640	0.03	1	1B/2A	63	Male	Yes	bronchioid	Moderate	No	IFN gamma dominant	0.548028
GSM1672641	75.73	1	1B/2A	68	Female	Yes	bronchioid	Well	No	Lymphocyte depleted	0.569488
GSM1672642	39.06	1	1B/2A	76	Male	Yes	bronchioid	Moderate	No	Lymphocyte depleted	0.738025
GSM1672643	77.6	1	3A	49	Male	Yes	bronchioid	Moderate	Yes	Wound healing	0.68137
GSM1672646	42.18	1	2B	60	Male	No	neuroendocrine	Poor	No	IFN gamma dominant	0.603498
GSM1672648	92.52	0	2B	47	Male	Yes	neuroendocrine	Moderate	Yes	Wound healing	0.801463
GSM1672649	39.36	1	1B/2A	64	Male	Yes	neuroendocrine	Moderate	No	Lymphocyte depleted	0.893102
GSM1672651	31.7	0	2	48	Male	Yes	neuroendocrine	Poor	Yes	IFN gamma dominant	0.704138
GSM1672652	42.02	1	3A	79	Male	Yes	bronchioid	Moderate	No	Lymphocyte depleted	0.754986
GSM1672653	5.78	1	3A	68	Female	Yes	bronchioid	Well	No	Lymphocyte depleted	0.801404
GSM1672655	47.9	1	1B/2A	82	Female	Yes	bronchioid	Moderate	No	IFN gamma dominant	0.409602
GSM1672656	58.84	0	1B/2A	70	Male	Yes	neuroendocrine	Moderate	No	Lymphocyte depleted	0.538726
GSM1672657	81.54	0	1B/2A	75	Male	Yes	bronchioid	Moderate	No	Inflammatory	0.736279
GSM1672658	24.51	1	1B/2A	63	Female	Yes	bronchioid	Moderate	No	IFN gamma dominant	0.70544
GSM1672659	7.03	1	1B/2A	81	Female	Yes	bronchioid	Moderate	No	IFN gamma dominant	0.420009
GSM1672660	9.63	1	2B	75	Female	Yes	neuroendocrine	Poor	No	Lymphocyte depleted	0.669474
GSM1672661	40.21	1	1B/2A	60	Female	Yes	bronchioid	Well	No	Lymphocyte depleted	0.710538
GSM1672662	66.69	0	1B/2A	60	Female	No	bronchioid	Well	No	Lymphocyte depleted	0.808624
GSM1672664	76.12	0	1B/2A	73	Male	Yes	neuroendocrine	Moderate	No	IFN gamma dominant	0.764373
GSM1672665	72.64	1	1B/2A	77	Male	Yes	squamoid	Moderate	No	Inflammatory	0.507612
GSM1672666	11.99	1	2B	50	Male	Yes	neuroendocrine	Moderate	No	Wound healing	0.676637
GSM1672667	6.24	1	2	59	Female	Yes	neuroendocrine	Moderate	No	Wound healing	0.803157
GSM1672669	78.85	0	2	58	Male	Yes	bronchioid	Poor	No	IFN gamma dominant	0.399339
GSM1672670	72.05	0	1B/2A	60	Male	Yes	neuroendocrine	Moderate	No	Wound healing	0.857138
GSM1672671	28.25	1	2	72	Male	No	squamoid	Moderate	No	Inflammatory	0.54253
GSM1672672	53.39	0	1B/2A	62	Female	Yes	bronchioid	Moderate	No	Lymphocyte depleted	0.821033
GSM1672674	52.2	1	1B/2A	82	Male	Yes	bronchioid	Moderate	No	Inflammatory	0.702411
GSM1672675	15.77	1	1B/2A	73	Male	No	neuroendocrine	Poor	No	Wound healing	0.895295
GSM1672676	27.66	1	2	57	Female	No	neuroendocrine	Poor	No	Wound healing	0.857802
GSM1672677	29.67	1	2	73	Male	Yes	neuroendocrine	Moderate	Yes	Wound healing	0.545141
GSM1672678	12.02	1	3A	70	Female	Yes	squamoid	Poor	No	Lymphocyte depleted	0.705147
GSM1672679	150.18	0	1B/2A	53	Male	Yes	neuroendocrine	Poor	No	Wound healing	0.82556
GSM1672680	15.47	1	3A	75	Male	Yes	bronchioid	Poor	No	Lymphocyte depleted	0.713814
GSM1672681	24.74	1	2	71	Female	Yes	bronchioid	Moderate	Yes	IFN gamma dominant	0.701839
GSM1672682	16.49	1	2	36	Male	No	neuroendocrine	Moderate	Yes	Wound healing	0.598587
GSM1672683	8.94	1	3A	68	Female	Yes	neuroendocrine	Moderate	Yes	Lymphocyte depleted	0.832134
GSM1672684	26.38	1	2B	68	Female	Yes	squamoid	Moderate	No	IFN gamma dominant	0.645774
GSM1672685	18.2	1	3A	65	Male	Yes	squamoid	Poor	No	IFN gamma dominant	0.881754
GSM1672686	79.54	1	3A	51	Female	Yes	bronchioid	Moderate	Yes	Inflammatory	0.58458
GSM1672688	80.9	1	2B	72	Male	NA	neuroendocrine	Poor	No	Lymphocyte depleted	0.821266
GSM1672689	11.7	1	3A	69	Male	NA	squamoid	Moderate	No	IFN gamma dominant	0.509504
GSM1672690	33.2	1	3A	68	Male	NA	neuroendocrine	Moderate	No	Inflammatory	0.577174
GSM1672691	42.5	1	2A	57	Male	NA	bronchioid	Moderate	No	Inflammatory	0.560732
GSM1672692	122.4	1	1B/2A	69	Male	NA	bronchioid	Poor	No	IFN gamma dominant	0.621729
GSM1672694	78.5	1	2A	72	Male	NA	neuroendocrine	Poor	No	Inflammatory	0.377857
GSM1672695	73.2	1	1B/2A	47	Male	NA	bronchioid	Well	No	Lymphocyte depleted	0.663224
GSM1672696	65.2	1	3A	64	Male	NA	neuroendocrine	Moderate	No	Inflammatory	0.662657
GSM1672697	145.8	0	2B	59	Male	NA	squamoid	Poor	No	Wound healing	0.668601
GSM1672699	3.3	1	2A	77	Male	NA	squamoid	Poor	No	IFN gamma dominant	0.387616
GSM1672701	8.4	1	2	70	Male	NA	squamoid	Poor	No	IFN gamma dominant	0.476305
GSM1672702	26.9	1	3A	57	Male	NA	bronchioid	Moderate	No	IFN gamma dominant	0.448789
GSM1672703	129.8	0	1B/2A	67	Male	NA	bronchioid	Poor	No	Inflammatory	0.432578
GSM1672704	19.6	1	3A	66	Male	NA	bronchioid	Poor	No	IFN gamma dominant	0.477228
GSM1672705	105.4	1	1B/2A	78	Male	NA	bronchioid	Moderate	No	IFN gamma dominant	0.362649
GSM1672706	157.5	1	1B/2A	46	Male	NA	bronchioid	Poor	No	Wound healing	0.736181
GSM1672708	47.8	1	1B/2A	66	Male	NA	squamoid	Well	No	Wound healing	0.685746
GSM1672709	130	1	2	65	Male	NA	neuroendocrine	Poor	No	Lymphocyte depleted	0.47885
GSM1672710	52.3	0	2A	46	Female	NA	bronchioid	Moderate	No	Wound healing	0.588533
GSM1672711	69.4	0	2A	63	Female	NA	bronchioid	Moderate	No	Inflammatory	0.571822
GSM1672712	25.95	1	2A	60	Male	NA	bronchioid	Poor	No	IFN gamma dominant	0.622136
GSM1672713	121.8	0	1B/2A	77	Male	NA	squamoid	Moderate	No	IFN gamma dominant	0.669902
GSM1672714	32.6	1	3A	44	Male	NA	squamoid	Poor	No	Lymphocyte depleted	0.522574
GSM1672716	14.5	1	3A	70	Male	NA	bronchioid	Poor	No	Lymphocyte depleted	0.513111
GSM1672718	19	1	1B/2A	66	Male	NA	squamoid	Poor	No	IFN gamma dominant	0.667839
GSM1672720	9	1	3A	62	Male	NA	squamoid	Poor	No	IFN gamma dominant	0.729907
GSM1672721	97.6	0	1B/2A	81	Male	NA	neuroendocrine	Poor	No	Wound healing	0.631302
GSM1672722	175.9	0	2A	65	Male	NA	neuroendocrine	Moderate	NA	Wound healing	0.690846
GSM1672723	45.3	1	2	61	Male	NA	neuroendocrine	Poor	NA	Wound healing	0.697203
Removal of 10 samples with positive surgical margins; Stage-1B/2A : T2N0M0

## Sheet: Table S2_CPTAC-LUAD
Sample	Stage	Age	Gender	Smoking	cluster	protein_cluster	Histological_grade	BestCall	Regin	Country	TMB	Estimate_purity
C3N.01799	2A	81	Male	Yes	bronchioid	bronchioid	Moderate	Inflammatory	Western	Usa	1.33333	0.52242
C3N.02729	2A	45	Male	No	bronchioid	bronchioid	Poor	Inflammatory	Asian	China	0.9	0.708162
C3L.00263	2B	79	Male	Yes	squamoid	squamoid	Moderate	Inflammatory	Western	Usa	0.166667	0.384798
C3N.01410	2B	64	Male	No	neuroendocrine	neuroendocrine	Poor	TGF beta dominant	Asian	Vietnam	7.26667	0.718998
C3N.00578	3A	48	Male	Yes	bronchioid	squamoid	Moderate	TGF beta dominant	Asian	Vietnam	0.766667	0.655485
C3L.00893	1B	71	Male	Yes	bronchioid	bronchioid	Well	Inflammatory	Western	Other	2.56667	0.687674
C3N.01488	1B	54	Male	Yes	bronchioid	bronchioid	Poor	IFN gamma dominant	Asian	Vietnam	16.0667	0.472613
C3N.01030	1B	56	Male	No	bronchioid	bronchioid	Poor	TGF beta dominant	Asian	Vietnam	21.1667	0.545597
C3N.00552	1B	49	Female	No	bronchioid	bronchioid	Poor	TGF beta dominant	Asian	Vietnam	1.06667	0.538728
C3N.00169	1B	57	Male	Yes	bronchioid	bronchioid	Moderate	TGF beta dominant	Asian	Vietnam	5.26667	0.675058
C3L.00422	2A	35	Female	No	bronchioid	bronchioid	Poor	Inflammatory	Western	Usa	0.3	0.715124
C3L.00083	1B	71	Male	Yes	bronchioid	neuroendocrine	Moderate	Inflammatory	Western	Usa	0.0333333	0.351569
C3N.00551	1B	54	Male	Yes	bronchioid	squamoid	Moderate	TGF beta dominant	Asian	Vietnam	17.1	0.611498
C3N.02089	1B	76	Male	No	neuroendocrine	neuroendocrine	Poor	IFN gamma dominant	Asian	Vietnam	29.4	0.761922
C3L.01682	1B	78	Female	Yes	bronchioid	bronchioid	Moderate	Inflammatory	Western	Usa	2.93333	0.475666
C3N.01016	3A	56	Male	Yes	neuroendocrine	neuroendocrine	Poor	IFN gamma dominant	Asian	Vietnam	10.5333	0.699254
C3N.00580	1B	56	Male	Yes	bronchioid	bronchioid	Moderate	IFN gamma dominant	Asian	Vietnam	28.0333	0.770456
X11LU013	3A	59	Male	No	bronchioid	neuroendocrine	NA	TGF beta dominant	Asian	Vietnam	1.56667	0.633713
C3N.02000	2A	46	Female	No	bronchioid	bronchioid	Moderate	IFN gamma dominant	Asian	China	0.766667	0.620165
C3N.01489	1B	65	Male	No	bronchioid	squamoid	Poor	Inflammatory	Asian	Vietnam	20.2	0.472197
C3N.01405	1B	59	Male	No	bronchioid	bronchioid	Poor	IFN gamma dominant	Asian	Vietnam	11.8333	0.669776
C3N.01416	3A	67	Female	No	bronchioid	bronchioid	Moderate	TGF beta dominant	Asian	Vietnam	2.36667	0.481807
C3N.02149	2B	64	Male	Yes	neuroendocrine	neuroendocrine	Moderate	IFN gamma dominant	Asian	Vietnam	14.6	0.699361
C3N.02424	2A	64	Male	Yes	squamoid	squamoid	Poor	IFN gamma dominant	Asian	China	1.83333	0.509819
C3N.02379	2B	57	Female	No	squamoid	squamoid	Poor	IFN gamma dominant	Asian	China	1.63333	0.634085
C3N.02572	2A	49	Male	No	bronchioid	bronchioid	Poor	TGF beta dominant	Asian	China	1.3	0.631262
X11LU016	3A	62	Male	No	bronchioid	bronchioid	NA	IFN gamma dominant	Asian	Vietnam	16.4	0.569961
C3L.02345	1B	61	Female	Yes	squamoid	squamoid	Moderate	Inflammatory	Western	Usa	7	0.541421
C3L.00093	1B	66	Female	No	squamoid	bronchioid	Moderate	IFN gamma dominant	Western	Usa	2.86667	0.491389
C3L.00913	3A	66	Male	Yes	squamoid	squamoid	Moderate	TGF beta dominant	Western	Usa	7	0.532118
X11LU022	1B	53	Male	No	bronchioid	bronchioid	NA	IFN gamma dominant	Asian	Vietnam	28.3	0.629065
C3N.00549	1B	58	Male	Yes	neuroendocrine	neuroendocrine	Poor	Wound healing	Asian	Vietnam	12.2667	0.891711
C3N.00203	2B	72	Male	Yes	squamoid	squamoid	Poor	IFN gamma dominant	Western	Bulgaria	13.1333	0.612318
C3N.00574	1B	40	Male	No	squamoid	squamoid	Moderate	IFN gamma dominant	Asian	Vietnam	1.66667	0.630523
C3N.01071	1B	48	Male	Yes	bronchioid	squamoid	Moderate	IFN gamma dominant	Asian	Vietnam	9.3	0.6942
C3N.00550	2B	52	Female	No	bronchioid	bronchioid	Moderate	TGF beta dominant	Asian	Vietnam	1.3	0.671861
C3N.00167	2A	64	Male	No	bronchioid	bronchioid	Moderate	TGF beta dominant	Asian	Vietnam	1.1	0.700187
C3L.00001	2A	61	Female	No	bronchioid	bronchioid	Poor	IFN gamma dominant	Western	Usa	1.56667	0.582042
C3N.01074	1B	56	Male	No	neuroendocrine	neuroendocrine	Poor	Inflammatory	Asian	Vietnam	13.6333	0.770686
C3L.01632	2A	60	Female	Yes	neuroendocrine	neuroendocrine	Poor	Inflammatory	Western	Usa	5.46667	0.724307
C3N.02155	2B	45	Male	Yes	neuroendocrine	bronchioid	Poor	Lymphocyte depleted	Asian	Vietnam	4.6	0.854911
C3N.02145	1B	68	Female	No	squamoid	squamoid	Moderate	TGF beta dominant	Asian	Vietnam	0.7	0.622694
C3N.02586	2A	73	Male	Yes	bronchioid	bronchioid	Moderate	Inflammatory	Asian	China	3.1	0.703464
C3L.02219	3A	77	Male	Yes	bronchioid	bronchioid	Moderate	IFN gamma dominant	Western	Usa	2.66667	0.548459
C3N.00180	3A	56	Male	Yes	neuroendocrine	neuroendocrine	Poor	Wound healing	Asian	Vietnam	3.26667	0.863299
C3N.00704	1B	68	Female	Yes	bronchioid	bronchioid	Moderate	IFN gamma dominant	Western	Usa	17.8667	0.700419
C3N.02158	3A	54	Female	No	bronchioid	bronchioid	Moderate	IFN gamma dominant	Asian	Vietnam	1.33333	0.720409
C3N.00556	2B	69	Male	No	squamoid	squamoid	Poor	IFN gamma dominant	Asian	Vietnam	13.9	0.461045
C3N.00294	2B	57	Male	Yes	bronchioid	bronchioid	NA	IFN gamma dominant	Western	Poland	32.8667	0.680264
C3N.01072	3A	62	Male	No	bronchioid	squamoid	Poor	TGF beta dominant	Asian	Vietnam	2.26667	0.601202
C3L.00144	1B	58	Male	Yes	bronchioid	bronchioid	Moderate	TGF beta dominant	Western	Usa	47.5333	0.575861
C3N.02380	2A	56	Male	Yes	bronchioid	bronchioid	Moderate	Inflammatory	Asian	China	1.23333	0.766301
C3N.00433	1B	57	Male	No	bronchioid	neuroendocrine	Poor	IFN gamma dominant	Western	Ukraine	4.26667	0.257115
C3L.01683	1B	77	Male	Yes	squamoid	squamoid	Poor	Inflammatory	Western	Usa	0.433333	0.223757
C3N.00293	1B	73	Male	Yes	bronchioid	bronchioid	NA	IFN gamma dominant	Western	Poland	8.8	0.678085
C3N.00546	2A	58	Male	Yes	bronchioid	bronchioid	Poor	Inflammatory	Asian	Vietnam	3.96667	0.581581
C3N.01414	1B	59	Male	No	neuroendocrine	neuroendocrine	Moderate	Inflammatory	Asian	Vietnam	15.5333	0.732225
C3N.02087	3A	61	Female	No	bronchioid	bronchioid	Poor	IFN gamma dominant	Asian	Vietnam	1.26667	0.467413
C3N.02529	2B	79	Female	No	bronchioid	bronchioid	Poor	IFN gamma dominant	Asian	China	3.16667	0.559837
C3N.02067	3A	37	Female	Yes	bronchioid	bronchioid	Moderate	Lymphocyte depleted	Asian	China	1	0.703063
C3L.00080	1B	58	Male	Yes	bronchioid	neuroendocrine	Moderate	IFN gamma dominant	Western	Other	20.7333	0.763439
C3N.00547	2A	60	Male	Yes	neuroendocrine	neuroendocrine	Moderate	IFN gamma dominant	Asian	Vietnam	18.8333	0.749034
C3N.01023	3A	58	Male	No	neuroendocrine	neuroendocrine	Poor	IFN gamma dominant	Asian	Vietnam	5.03333	0.60631
C3N.01024	2B	66	Female	No	bronchioid	bronchioid	Poor	Lymphocyte depleted	Asian	Vietnam	1.63333	0.747281
C3L.00973	1B	76	Male	No	squamoid	squamoid	Moderate	IFN gamma dominant	Western	Russia	0.8	0.475759
C3L.02348	2A	58	Female	Yes	bronchioid	bronchioid	Moderate	Inflammatory	Western	Usa	1.8	0.59018
C3L.02508	2A	65	Male	Yes	bronchioid	bronchioid	Moderate	Inflammatory	Western	Other	0.333333	0.398363
C3N.00560	3A	55	Male	Yes	neuroendocrine	squamoid	Poor	IFN gamma dominant	Asian	Vietnam	35.7	0.761913
C3L.00604	3A	61	Female	No	bronchioid	bronchioid	Moderate	TGF beta dominant	Western	Usa	1.23333	0.664178
C3N.00579	1B	67	Male	No	bronchioid	bronchioid	Moderate	IFN gamma dominant	Asian	Vietnam	1.86667	0.616888
C3N.02582	2A	77	Male	Yes	bronchioid	bronchioid	Poor	IFN gamma dominant	Asian	China	2.96667	0.706201
C3N.00959	1B	66	Male	Yes	squamoid	squamoid	Moderate	Inflammatory	Western	Usa	0.766667	0.730046
C3N.02003	3A	56	Male	Yes	squamoid	squamoid	Poor	IFN gamma dominant	Asian	China	8.6	0.469772
C3N.00175	1B	72	Male	Yes	bronchioid	bronchioid	Moderate	Inflammatory	Asian	Vietnam	36.8333	0.638371
C3N.01823	3A	63	Male	No	neuroendocrine	neuroendocrine	Moderate	IFN gamma dominant	Western	Ukraine	13.2667	0.628084
C3L.02549	2B	69	Male	Yes	squamoid	squamoid	Well	IFN gamma dominant	Western	Usa	0.933333	0.69929
C3L.02365	2B	62	Female	Yes	bronchioid	bronchioid	Poor	TGF beta dominant	Western	Usa	10.9	0.780082

## Sheet: Table S2_GSE72094
Sample	time	event	Stage	Age	Gender	Smoking	cluster	BestCall	Estimate_purity
GSM1854799	34.75	0	2B	59	Female	Yes	squamoid	TGF beta dominant	0.314676
GSM1854800	33.7	0	1B	57	Male	NA	neuroendocrine	IFN gamma dominant	0.497337
GSM1854801	29.42	0	1B	72	Female	No	bronchioid	Inflammatory	0.583985
GSM1854806	29.29	0	1B	66	Male	Yes	bronchioid	Inflammatory	0.507288
GSM1854807	17.23	1	2B	68	Male	Yes	bronchioid	IFN gamma dominant	0.530815
GSM1854811	34.62	0	2B	85	Female	No	bronchioid	Inflammatory	0.65944
GSM1854814	28.08	0	2B	44	Male	Yes	bronchioid	TGF beta dominant	0.625815
GSM1854816	13.55	0	3A	50	Male	NA	neuroendocrine	Inflammatory	0.52914
GSM1854819	0.92	0	3A	67	Male	Yes	bronchioid	IFN gamma dominant	0.500078
GSM1854821	41.42	0	2B	83	Male	Yes	bronchioid	IFN gamma dominant	0.47386
GSM1854822	46.09	0	1B	65	Male	Yes	neuroendocrine	Inflammatory	0.766321
GSM1854823	26.27	0	2B	57	Female	Yes	squamoid	IFN gamma dominant	0.776152
GSM1854826	48.92	0	1B	69	Male	Yes	bronchioid	Inflammatory	0.424813
GSM1854827	19.04	0	1B	66	Female	Yes	squamoid	IFN gamma dominant	0.471893
GSM1854829	37.84	0	3A	69	Male	Yes	bronchioid	Inflammatory	0.546964
GSM1854831	10.32	1	3A	77	Male	Yes	neuroendocrine	Wound healing	0.778756
GSM1854833	49.12	0	2B	79	Male	Yes	bronchioid	Inflammatory	0.405428
GSM1854834	33.67	0	1B	66	Female	Yes	bronchioid	TGF beta dominant	0.478772
GSM1854837	1.51	1	2B	78	Female	NA	bronchioid	Inflammatory	0.670885
GSM1854838	40.47	1	1B	50	Female	Yes	squamoid	TGF beta dominant	0.440893
GSM1854841	24	0	1B	65	Female	Yes	squamoid	Inflammatory	0.732937
GSM1854842	35.47	1	3A	75	Female	Yes	bronchioid	Inflammatory	0.39068
GSM1854843	37.05	0	1B	66	Male	Yes	bronchioid	TGF beta dominant	0.434513
GSM1854844	6.35	1	3A	52	Female	Yes	neuroendocrine	Inflammatory	0.80744
GSM1854849	48.16	0	1B	77	Male	Yes	bronchioid	Inflammatory	0.482599
GSM1854855	10.09	1	1B	84	Male	Yes	squamoid	IFN gamma dominant	0.480199
GSM1854856	29.75	1	3A	78	Female	No	bronchioid	Inflammatory	0.343156
GSM1854857	45.63	0	1B	75	Female	Yes	bronchioid	IFN gamma dominant	0.548372
GSM1854859	26.76	1	3A	74	Female	Yes	neuroendocrine	Inflammatory	0.354674
GSM1854863	48.92	0	1B	71	Female	Yes	bronchioid	Inflammatory	0.681758
GSM1854865	53.36	0	2B	62	Male	Yes	neuroendocrine	Inflammatory	0.387144
GSM1854866	40.7	0	1B	72	Female	Yes	neuroendocrine	IFN gamma dominant	0.575202
GSM1854867	48.69	0	1B	64	Male	Yes	neuroendocrine	Inflammatory	0.6693
GSM1854868	14.14	1	2B	66	Male	Yes	squamoid	IFN gamma dominant	0.554116
GSM1854871	36.82	0	2B	78	Female	Yes	bronchioid	Inflammatory	0.700589
GSM1854874	28.64	1	2A	72	Female	Yes	bronchioid	Inflammatory	0.396905
GSM1854875	34.95	0	2B	64	Male	Yes	bronchioid	Inflammatory	0.364991
GSM1854876	29.82	0	2B	74	Female	Yes	neuroendocrine	Lymphocyte depleted	0.658368
GSM1854881	24.07	1	2B	76	Male	Yes	neuroendocrine	Inflammatory	0.48098
GSM1854884	10.78	1	3A	64	Male	Yes	bronchioid	Inflammatory	0.274861
GSM1854885	17.36	1	1B	82	Male	Yes	squamoid	Inflammatory	0.556727
GSM1854886	13.64	1	3A	59	Male	No	squamoid	Inflammatory	0.651087
GSM1854889	12.59	1	3A	67	Male	Yes	neuroendocrine	Inflammatory	0.633619
GSM1854890	36.56	0	2B	68	Male	Yes	neuroendocrine	Inflammatory	0.450659
GSM1854892	8.02	1	2B	85	Male	Yes	bronchioid	Lymphocyte depleted	0.656627
GSM1854893	0.1	1	2B	47	Female	NA	squamoid	IFN gamma dominant	0.369967
GSM1854895	10.29	1	3A	74	Female	NA	squamoid	TGF beta dominant	0.445098
GSM1854904	34.88	0	1B	62	Female	Yes	neuroendocrine	Inflammatory	0.434707
GSM1854911	32.84	1	1B	69	Male	Yes	bronchioid	Lymphocyte depleted	0.839976
GSM1854913	22.22	0	1B	73	Female	Yes	neuroendocrine	Inflammatory	0.350192
GSM1854918	38.01	0	2A	72	Female	No	bronchioid	Inflammatory	0.466311
GSM1854920	31.23	0	1B	85	Female	Yes	bronchioid	Inflammatory	0.680844
GSM1854921	1.64	1	2A	76	Male	Yes	bronchioid	IFN gamma dominant	0.607061
GSM1854923	43.59	0	1B	79	Female	Yes	bronchioid	Inflammatory	0.406904
GSM1854926	8.61	0	3A	67	Female	Yes	bronchioid	IFN gamma dominant	0.398232
GSM1854928	40.73	0	1B	63	Male	Yes	bronchioid	Inflammatory	0.394667
GSM1854929	22.45	0	1B	62	Male	Yes	bronchioid	Inflammatory	0.425724
GSM1854930	30.44	0	1B	76	Male	Yes	bronchioid	TGF beta dominant	0.417814
GSM1854931	31.43	0	1B	76	Female	Yes	bronchioid	Inflammatory	0.352912
GSM1854932	26.37	0	2B	59	Female	Yes	bronchioid	IFN gamma dominant	0.40596
GSM1854934	27.91	0	1B	72	Male	Yes	bronchioid	Inflammatory	0.539684
GSM1854935	16.83	1	2B	79	Male	No	squamoid	TGF beta dominant	0.579202
GSM1854936	31.63	0	1B	66	Female	Yes	bronchioid	Inflammatory	0.791183
GSM1854937	31.96	0	2A	63	Male	NA	bronchioid	Inflammatory	0.439401
GSM1854938	2.6	0	2B	60	Female	Yes	squamoid	IFN gamma dominant	0.549139
GSM1854942	17.33	0	3A	68	Male	Yes	squamoid	TGF beta dominant	0.479594
GSM1854944	38.33	0	1B	77	Female	Yes	bronchioid	Inflammatory	0.328645
GSM1854945	65.23	0	3A	68	Female	NA	bronchioid	IFN gamma dominant	0.447379
GSM1854947	9.24	1	2B	70	Male	Yes	squamoid	Lymphocyte depleted	0.618341
GSM1854950	28.73	0	1B	72	Male	Yes	bronchioid	Inflammatory	0.424004
GSM1854952	36.36	0	2A	72	Female	NA	bronchioid	Inflammatory	0.436744
GSM1854955	24.92	0	3A	72	Female	Yes	bronchioid	Inflammatory	0.767193
GSM1854957	9.3	1	2A	77	Female	Yes	bronchioid	TGF beta dominant	0.602908
GSM1854960	31.2	0	2B	60	Male	Yes	bronchioid	Inflammatory	0.591428
GSM1854962	26.56	0	3A	74	Male	Yes	bronchioid	Inflammatory	0.475315
GSM1854963	1.15	1	2A	72	Female	Yes	squamoid	TGF beta dominant	0.494506
GSM1854967	30.38	0	1B	78	Male	Yes	bronchioid	IFN gamma dominant	0.531519
GSM1854970	12.89	0	1B	64	Male	Yes	bronchioid	IFN gamma dominant	0.480621
GSM1854971	16.08	0	1B	83	Male	Yes	bronchioid	Inflammatory	0.451624
GSM1854974	27.62	0	2B	83	Male	No	bronchioid	Inflammatory	0.259493
GSM1854975	29.95	0	1B	78	Male	Yes	squamoid	IFN gamma dominant	0.50276
GSM1854977	22.75	0	1B	66	Male	Yes	bronchioid	Inflammatory	0.357551
GSM1854979	24.69	0	1B	67	Male	Yes	neuroendocrine	Inflammatory	0.464542
GSM1854981	19.43	1	2A	79	Female	No	bronchioid	IFN gamma dominant	0.747922
GSM1854983	3.81	1	1B	81	Male	No	squamoid	TGF beta dominant	0.683063
GSM1854985	22.59	0	3A	79	Female	Yes	bronchioid	Inflammatory	0.353861
GSM1854986	18.97	0	1B	77	Male	Yes	squamoid	TGF beta dominant	0.347181
GSM1854992	18.21	0	1B	70	Female	NA	squamoid	TGF beta dominant	0.475386
GSM1854996	21.4	1	1B	69	Female	Yes	bronchioid	Inflammatory	0.671378
GSM1854998	28.01	1	3A	61	Female	Yes	neuroendocrine	IFN gamma dominant	0.478375
GSM1854999	29.49	0	1B	77	Female	Yes	bronchioid	Inflammatory	0.438611
GSM1855001	16.01	1	2B	62	Female	Yes	neuroendocrine	TGF beta dominant	0.516505
GSM1855003	27.88	0	1B	75	Female	Yes	bronchioid	Inflammatory	0.301689
GSM1855005	32.12	0	3A	59	Female	Yes	bronchioid	Inflammatory	0.157351
GSM1855006	32.48	0	2B	79	Male	Yes	squamoid	TGF beta dominant	0.46081
GSM1855009	24.85	0	3A	61	Female	Yes	neuroendocrine	Wound healing	0.59797
GSM1855012	35.47	0	1B	74	Female	No	bronchioid	TGF beta dominant	0.5434
GSM1855015	28.54	0	1B	75	Female	Yes	bronchioid	Inflammatory	0.671201
GSM1855018	28.87	0	1B	68	Female	No	bronchioid	TGF beta dominant	0.463146
GSM1855021	29.26	0	1B	70	Female	Yes	bronchioid	IFN gamma dominant	0.372985
GSM1855022	27.32	0	1B	70	Male	NA	squamoid	IFN gamma dominant	0.452753
GSM1855023	38.6	0	2B	59	Female	Yes	neuroendocrine	Inflammatory	0.708364
GSM1855024	33.07	0	2A	82	Male	Yes	bronchioid	Inflammatory	0.319817
GSM1855027	27.52	1	1B	61	Female	NA	neuroendocrine	IFN gamma dominant	0.443363
GSM1855032	26.89	0	1B	73	Female	No	bronchioid	Inflammatory	0.481443
GSM1855033	33.24	0	1B	65	Female	NA	squamoid	IFN gamma dominant	0.676421
GSM1855037	34.75	0	1B	38	Female	NA	neuroendocrine	Inflammatory	0.756853
GSM1855038	28.64	0	1B	62	Female	NA	neuroendocrine	Wound healing	0.643589
GSM1855039	8.78	1	2B	69	Male	Yes	squamoid	TGF beta dominant	0.303185
GSM1855043	33.83	0	1B	70	Male	Yes	neuroendocrine	Inflammatory	0.601749
GSM1855047	33.5	0	2B	73	Female	Yes	neuroendocrine	Inflammatory	0.339813
GSM1855048	21.44	1	1B	77	Male	Yes	neuroendocrine	Inflammatory	0.939179
GSM1855050	22.95	0	1B	63	Female	Yes	bronchioid	Inflammatory	0.532027
GSM1855053	33.37	0	1B	72	Female	No	bronchioid	Inflammatory	0.546117
GSM1855056	34.88	0	1B	67	Female	Yes	bronchioid	Inflammatory	0.828399
GSM1855057	2.5	0	2A	70	Female	Yes	bronchioid	Inflammatory	0.479068
GSM1855059	19.33	0	1B	71	Male	Yes	bronchioid	TGF beta dominant	0.569923
GSM1855060	33.96	0	1B	64	Female	Yes	squamoid	TGF beta dominant	0.487385
GSM1855062	19.73	1	2B	72	Female	Yes	bronchioid	IFN gamma dominant	0.405734
GSM1855063	11.47	1	3A	66	Male	Yes	bronchioid	Inflammatory	0.469022
GSM1855064	32.22	0	1B	69	Male	Yes	bronchioid	TGF beta dominant	0.436105
GSM1855065	23.8	0	2B	81	Male	Yes	bronchioid	TGF beta dominant	0.489753
GSM1855066	32.78	0	2B	80	Female	Yes	squamoid	Inflammatory	0.652937
GSM1855067	32.45	0	1B	75	Male	Yes	bronchioid	TGF beta dominant	0.635753
GSM1855069	10.03	0	2A	58	Male	NA	bronchioid	IFN gamma dominant	0.593022
GSM1855070	32.68	0	3A	71	Female	No	bronchioid	IFN gamma dominant	0.435273
GSM1855072	22.32	0	1B	86	Female	Yes	bronchioid	Inflammatory	0.343238
GSM1855075	29.49	0	2A	77	Male	Yes	bronchioid	TGF beta dominant	0.558816
GSM1855076	30.15	0	3A	60	Female	NA	bronchioid	Inflammatory	0.296479
GSM1855077	28.11	0	1B	75	Male	Yes	bronchioid	Inflammatory	0.530802
GSM1855079	11.05	1	1B	66	Male	Yes	squamoid	TGF beta dominant	0.475202
GSM1855080	22.06	0	2B	80	Female	Yes	bronchioid	Inflammatory	0.369781
GSM1855083	27.35	0	3A	56	Male	Yes	neuroendocrine	Wound healing	0.800163
GSM1855086	29	0	1B	82	Male	NA	bronchioid	Inflammatory	0.537395
GSM1855087	30.84	0	1B	77	Male	Yes	bronchioid	Inflammatory	0.482879
GSM1855089	27.42	0	1B	78	Female	No	squamoid	Inflammatory	0.511831
GSM1855091	30.77	1	1B	79	Male	Yes	bronchioid	Inflammatory	0.401913
GSM1855092	24.07	0	1B	78	Female	Yes	bronchioid	Inflammatory	0.383456
GSM1855094	19.96	0	1B	66	Female	No	neuroendocrine	Lymphocyte depleted	0.802057
GSM1855097	28.04	0	3A	66	Female	Yes	bronchioid	IFN gamma dominant	0.527239
GSM1855098	24.95	0	1B	83	Female	Yes	bronchioid	Inflammatory	0.426628
GSM1855099	30.15	1	1B	81	Male	NA	bronchioid	Inflammatory	0.746515
GSM1855100	28.54	0	1B	67	Female	Yes	neuroendocrine	Inflammatory	0.61517
GSM1855101	30.25	1	3A	55	Female	Yes	bronchioid	IFN gamma dominant	0.743196
GSM1855102	19.96	0	3A	73	Female	NA	bronchioid	Inflammatory	0.344327
GSM1855103	18.67	0	1B	69	Male	Yes	neuroendocrine	IFN gamma dominant	0.663404
GSM1855108	30.18	0	3A	61	Female	Yes	squamoid	TGF beta dominant	0.602645
GSM1855110	22.36	0	2A	61	Male	Yes	bronchioid	Inflammatory	0.329794
GSM1855117	15.45	0	3A	74	Female	NA	squamoid	IFN gamma dominant	0.759162
GSM1855119	25.64	0	3A	50	Female	Yes	neuroendocrine	Inflammatory	0.631975
GSM1855120	7.1	1	1B	70	Female	No	squamoid	IFN gamma dominant	0.354257
GSM1855121	9.67	1	3A	67	Male	Yes	squamoid	TGF beta dominant	0.279925
GSM1855122	24.89	0	2A	41	Male	No	bronchioid	IFN gamma dominant	0.726601
GSM1855124	35.8	0	1B	51	Male	Yes	neuroendocrine	Inflammatory	0.647987
GSM1855125	0.56	1	1B	74	Male	Yes	bronchioid	TGF beta dominant	0.4799
GSM1855126	18.97	0	2B	66	Female	NA	bronchioid	Inflammatory	0.730715
GSM1855127	17.72	0	3A	52	Female	NA	bronchioid	Inflammatory	0.332121
GSM1855132	28.21	0	1B	79	Female	Yes	bronchioid	Inflammatory	0.322668
GSM1855133	23.05	0	1B	59	Female	Yes	bronchioid	Inflammatory	0.397269
GSM1855135	17.72	0	3A	83	Female	Yes	bronchioid	TGF beta dominant	0.524397
GSM1855137	18.31	0	3A	72	Male	Yes	bronchioid	IFN gamma dominant	0.526888
GSM1855144	27.95	0	1B	51	Male	No	bronchioid	Inflammatory	0.670146
GSM1855149	27.35	0	1B	69	Female	NA	bronchioid	Inflammatory	0.371343
GSM1855150	3.22	1	2B	73	Female	NA	neuroendocrine	Wound healing	0.659874
GSM1855153	10.68	1	1B	66	Male	NA	bronchioid	Inflammatory	0.694946
GSM1855156	32.15	0	2B	66	Female	Yes	bronchioid	Inflammatory	0.340986
GSM1855157	26.5	0	2B	85	Male	Yes	bronchioid	TGF beta dominant	0.410722
GSM1855158	22.95	0	2A	81	Male	NA	bronchioid	Inflammatory	0.70972
GSM1855160	10.68	0	2A	56	Male	Yes	bronchioid	Inflammatory	0.641335
GSM1855161	10.92	1	1B	66	Male	Yes	bronchioid	IFN gamma dominant	0.406822
GSM1855162	24.13	0	1B	77	Female	NA	bronchioid	Inflammatory	0.493008
GSM1855164	27.29	0	2B	54	Female	NA	bronchioid	Wound healing	0.484705
GSM1855165	17.79	1	1B	68	Female	NA	bronchioid	Inflammatory	0.70845
GSM1855166	22.32	0	2B	68	Male	Yes	bronchioid	IFN gamma dominant	0.373064
GSM1855173	22.22	1	2B	77	Male	Yes	neuroendocrine	Inflammatory	0.847838
GSM1855174	17.75	0	3A	80	Female	Yes	bronchioid	IFN gamma dominant	0.491255
GSM1855175	12.49	1	3A	76	Female	NA	bronchioid	IFN gamma dominant	0.354295
GSM1855178	1.91	1	2B	76	Female	NA	squamoid	IFN gamma dominant	0.704187
GSM1855179	0.16	0	1B	66	Male	NA	squamoid	TGF beta dominant	0.476451
GSM1855180	18.21	0	3A	52	Female	Yes	bronchioid	Inflammatory	0.429689
GSM1855181	17.56	0	2A	62	Male	NA	neuroendocrine	IFN gamma dominant	0.630911
GSM1855182	0.13	0	2B	71	Female	No	bronchioid	Inflammatory	0.590985
GSM1855183	55.63	0	2B	53	Female	Yes	bronchioid	Inflammatory	0.376944
GSM1855184	7.33	1	2A	73	Female	Yes	bronchioid	IFN gamma dominant	0.322994
GSM1855185	35.67	0	1B	67	Male	Yes	squamoid	TGF beta dominant	0.329347
GSM1855188	44.61	1	1B	82	Male	Yes	bronchioid	TGF beta dominant	0.468311
GSM1855192	7.86	1	2B	70	Female	NA	bronchioid	IFN gamma dominant	0.49142
GSM1855193	11.47	0	1B	75	Female	Yes	bronchioid	IFN gamma dominant	0.56022
GSM1855195	33.7	1	2B	63	Male	NA	bronchioid	TGF beta dominant	0.593845
GSM1855196	51.29	1	2B	66	Female	Yes	bronchioid	Lymphocyte depleted	0.563582
GSM1855199	9.63	1	1B	61	Female	Yes	squamoid	Lymphocyte depleted	0.662073
GSM1855202	20.61	1	1B	56	Female	Yes	squamoid	Inflammatory	0.784701
GSM1855204	33.11	1	3A	62	Female	Yes	bronchioid	Inflammatory	0.629604
GSM1855206	22.39	1	3A	77	Male	Yes	squamoid	Inflammatory	0.799382
GSM1855207	42.51	0	2B	81	Female	Yes	squamoid	IFN gamma dominant	0.626664
GSM1855208	42.51	1	1B	65	Male	Yes	bronchioid	Inflammatory	0.384468
GSM1855209	31.82	1	1B	61	Female	Yes	neuroendocrine	Lymphocyte depleted	0.899327
GSM1855211	53.13	0	1B	63	Female	Yes	neuroendocrine	IFN gamma dominant	0.644461
GSM1855215	50.99	0	1B	79	Male	Yes	bronchioid	Inflammatory	0.543204
GSM1855217	51.09	0	1B	85	Female	NA	bronchioid	Inflammatory	0.565401
GSM1855220	49.64	0	1B	57	Female	NA	squamoid	Inflammatory	0.767357
GSM1855224	20.32	1	2B	54	Female	NA	squamoid	TGF beta dominant	0.465564
GSM1855230	54.31	0	2B	76	Female	Yes	bronchioid	IFN gamma dominant	0.485601
GSM1855231	16.08	1	2B	59	Male	Yes	neuroendocrine	TGF beta dominant	0.580602
GSM1855234	55.66	0	1B	83	Male	Yes	bronchioid	IFN gamma dominant	0.435731
GSM1855236	54.31	0	1B	75	Male	Yes	bronchioid	Inflammatory	0.372316
GSM1855237	5.95	1	3A	81	Female	Yes	squamoid	TGF beta dominant	0.611215

## Sheet: Table S2_TCGA-LUAD
Sample	time	event	Stage	Age	Gender	Smoking	cluster	Chemotherapy	drug_name	TCGA_subtype	Subtype_32111252	Subtype_33023953	Subtype_36040373	Subtype_27775076	BestCall	Global_super	Immunospecific_super	Global.methylation.level	MHC_II_methylation	MHC.II	FGA	TMB	Estimate_purity
TCGA-69-8453-01	26.73	0	2B	77	Male	Yes	bronchioid	Yes	NA	TRU	TRU_2	NA	S5	AD.4	IFN gamma dominant	2.9603	3.05649	0.507069	0.666036	0.835433	0.1046	NA	0.566139
TCGA-78-7143-01	163.1	1	1B	62	Female	No	bronchioid	No	NA	TRU	TRU_1	Mesenchymal	S1	AD.5a	IFN gamma dominant	3.12084	2.95951	0.471188	0.812003	0.724251	0.1974	NA	0.828094
TCGA-86-A4D0-01	3.81	1	2A	48	Male	Yes	neuroendocrine	Yes	Cisplatin	prox-prolif	prox.-prolif._3	Proliferative	S4	AD.1	IFN gamma dominant	3.0735	2.13598	0.442901	0.639457	0.17719	0.3059	NA	0.91765
TCGA-86-A4P8-01	26.47	0	3A	59	Female	No	bronchioid	Yes	Cisplatin	TRU	TRU_3	NA	S5	AD.4	Inflammatory	3.12625	3.10427	0.524484	0.730692	0.74415	0.0001	NA	0.465615
TCGA-55-8513-01	26.01	0	2B	77	Female	No	bronchioid	Yes	NA	TRU	TRU_2	Mucinous	S5	AD.4	IFN gamma dominant	3.16608	3.21924	0.505038	0.775018	0.738639	0	0.2	0.604936
TCGA-38-A44F-01	4.37	0	1B	80	Male	Yes	bronchioid	No	NA	TRU	TRU_2	Mucinous	S5	AD.4	Inflammatory	3.08267	3.33016	0.514579	0.746008	0.740273	0	0.366667	0.584751
TCGA-50-5055-01	60.16	1	2A	79	Female	NA	bronchioid	Yes	NA	TRU	TRU_3	NA	S3	AD.4	IFN gamma dominant	2.51942	2.85237	0.488169	0.64114	0.843956	0.0342	0.7	0.435035
TCGA-55-8619-01	13.68	0	2B	72	Female	No	bronchioid	No	NA	TRU	TRU_2	Mucinous	S5	AD.4	Inflammatory	2.85848	3.01483	0.515481	0.741513	0.780872	0	0.666667	0.551568
TCGA-91-A4BD-01	19.82	0	2A	78	Male	Yes	bronchioid	No	NA	TRU	TRU_3	NA	S5	AD.4	IFN gamma dominant	2.74056	2.46721	0.501882	0.711625	0.772546	0.137	0.566667	0.749063
TCGA-62-8397-01	42.38	0	2B	70	Female	No	bronchioid	No	NA	TRU	TRU_1	Mesenchymal	S5	AD.5b	Inflammatory	2.80598	2.81711	0.438493	0.732229	0.814625	0.2308	0.8	0.769396
TCGA-69-7761-01	6.12	0	1B	84	Male	Yes	squamoid	Yes	NA	prox-inflam	TRU_2	Mucinous	S5	AD.1	IFN gamma dominant	2.70004	2.98004	0.454207	0.673081	0.718074	0.0782	0.966667	0.606587
TCGA-L9-A50W-01	14.53	1	2A	75	Male	Yes	bronchioid	No	NA	TRU	TRU_1	NA	S5	AD.5b	Inflammatory	3.2916	3.11528	0.481325	0.757788	0.762787	0.2589	1.06667	0.802136
TCGA-55-8091-01	19.73	0	1B	74	Male	Yes	bronchioid	No	NA	TRU	TRU_3	NA	S2	AD.3	Inflammatory	2.95675	3.35181	0.506695	0.703272	0.788482	0.4845	0.966667	0.594613
TCGA-55-8087-01	15.19	0	1B	59	Female	No	bronchioid	No	NA	TRU	TRU_1	NA	S5	AD.5b	Inflammatory	3.26197	2.72283	0.449332	0.677892	0.32478	0.0996	1.13333	0.829011
TCGA-62-A46Y-01	13.61	1	3A	70	Female	No	bronchioid	Yes	Cisplatin	TRU	TRU_3	NA	S5	AD.4	IFN gamma dominant	3.0979	2.99313	0.498136	0.729667	0.817369	0.1431	1.16667	0.711034
TCGA-97-8175-01	18.11	0	1B	55	Female	Yes	bronchioid	Yes	Cisplatin	prox-inflam	prox.-inflam	Mesenchymal	S3	AD.2	IFN gamma dominant	2.95669	3.18462	0.475168	0.731787	0.38886	0.1336	0.933333	0.746652
TCGA-91-8496-01	16.6	0	1B	63	Female	No	bronchioid	No	NA	TRU	TRU_1	NA	S5	AD.4	Lymphocyte depleted	2.14625	2.26498	0.489127	0.75639	0.816819	0.2102	1.03333	0.66092
TCGA-NJ-A7XG-01	20.28	0	3A	49	Male	Yes	bronchioid	Yes	Cisplatin	TRU	TRU_1	NA	S5	AD.5b	Inflammatory	3.28789	2.75022	0.440351	0.667541	0.628556	0.4205	0.9	0.956364
TCGA-05-4433-01	24	0	1B	82	Male	Yes	bronchioid	No	NA	TRU	TRU_2	Mucinous	S5	AD.4	IFN gamma dominant	2.84039	2.96896	0.471056	0.703746	0.728718	0.1589	1.06667	0.715226
TCGA-MP-A4T9-01	41.59	1	3A	54	Female	Yes	bronchioid	Yes	Cisplatin	TRU	TRU_1	Mesenchymal	S2	AD.4	Wound healing	3.4755	3.12514	0.518567	0.68328	0.306156	0.0198	1.03333	0.691556
TCGA-05-5429-01	9.04	1	3A	60	Male	No	squamoid	No	NA	prox-prolif	TRU_2	Mucinous	S5	AD.5b	IFN gamma dominant	2.11811	2.67348	0.445829	0.682336	0.249187	0.2466	1.13333	0.846824
TCGA-86-8671-01	27.58	0	2B	72	Female	No	bronchioid	Yes	Cisplatin	TRU	TRU_1	Mesenchymal	S3	AD.4	IFN gamma dominant	3.06377	3.26928	0.473745	0.658991	0.86228	0.0023	1.13333	0.387395
TCGA-55-8505-01	14.47	0	3A	62	Male	No	squamoid	Yes	Cisplatin	prox-prolif	prox.-prolif._4	Mucinous	S4	AD.3	Wound healing	3.00896	2.85853	0.452221	0.655989	0.110693	0.0096	0.933333	0.833716
TCGA-97-8177-01	16.41	0	1B	59	Female	No	bronchioid	Yes	NA	TRU	TRU_1	Mesenchymal	S5	AD.4	TGF beta dominant	2.96691	2.83774	0.469259	0.738754	0.835632	0.1677	1.06667	0.567866
TCGA-97-7552-01	63.52	0	1B	70	Male	Yes	bronchioid	No	NA	TRU	TRU_2	Mucinous	S5	AD.4	Inflammatory	2.46528	2.97753	0.510952	0.688124	0.75797	0.0037	1.16667	0.562028
TCGA-86-8280-01	23.05	0	2A	54	Female	No	bronchioid	Yes	Cisplatin	TRU	TRU_3	NA	S5	AD.4	TGF beta dominant	3.23732	3.12105	0.421431	0.707149	0.794795	0.2915	1.43333	0.600516
TCGA-49-4512-01	29.75	1	3A	69	Female	No	bronchioid	Yes	NA	TRU	TRU_1	Mesenchymal	S2	AD.4	Wound healing	3.49736	3.32405	0.484652	0.740335	0.736005	0.3116	1.36667	0.668473
TCGA-55-7284-01	7.99	1	2B	74	Male	Yes	bronchioid	No	NA	TRU	TRU_2	Mucinous	S5	AD.5b	TGF beta dominant	3.10877	3.21212	0.397452	0.5677	0.620949	0.0259	1.33333	0.68443
TCGA-44-A47B-01	9.44	0	1B	79	Male	Yes	bronchioid	No	NA	prox-prolif	TRU_1	NA	S1	AD.5a	Inflammatory	3.49744	2.83591	0.459898	0.711089	0.248167	0.3063	1.33333	0.781936
TCGA-86-8075-01	22.82	1	1B	66	Female	No	bronchioid	Yes	Cisplatin	prox-inflam	prox.-prolif._1	Mesenchymal	S2	AD.3	IFN gamma dominant	3.3253	3.11662	0.422872	0.688984	0.259508	0.2397	1.66667	0.639726
TCGA-86-8055-01	4.08	1	2A	79	Male	Yes	bronchioid	No	NA	prox-inflam	prox.-prolif._1	Mesenchymal	S2	AD.3	Wound healing	2.98053	3.17359	0.390779	0.639208	0.593166	0.1831	1.36667	0.616454
TCGA-78-7163-01	238.29	0	1B	60	Male	Yes	bronchioid	No	NA	TRU	TRU_3	Proliferative	S5	AD.4	Lymphocyte depleted	2.81051	2.96626	0.40318	0.742567	0.749269	0.3872	1.63333	0.958492
TCGA-62-A46V-01	72.3	0	1B	78	Female	Yes	bronchioid	No	NA	TRU	TRU_1	NA	S2	AD.5a	Wound healing	3.25978	3.15037	0.530934	0.716558	0.393251	0.292	1.8	0.795753
TCGA-97-8547-01	21.6	0	3A	78	Female	No	bronchioid	Yes	NA	prox-inflam	TRU_1	NA	S2	AD.2	Wound healing	3.31592	3.35369	0.48698	0.633549	0.742143	0.3273	1.8	0.66113
TCGA-49-4490-01	12.66	1	3A	45	Female	Yes	bronchioid	Yes	Cisplatin	TRU	TRU_1	Mesenchymal	S2	AD.3	Wound healing	3.66595	3.0745	0.443581	0.702647	0.644971	0.2916	1.6	0.77137
TCGA-62-A472-01	29.92	0	2B	70	Male	Yes	bronchioid	No	NA	prox-inflam	TRU_1	Mesenchymal	S3	AD.2	IFN gamma dominant	3.28639	2.87375	0.494623	0.707808	0.334802	0.2944	1.76667	0.799738
TCGA-62-8402-01	49.25	1	3A	73	Female	No	neuroendocrine	No	NA	prox-prolif	prox.-prolif._3	Proliferative	S4	AD.1	IFN gamma dominant	3.09845	2.43827	0.374358	0.681476	0.4083	0.3729	1.36667	0.77774
TCGA-86-6562-01	12.36	1	2A	52	Male	No	bronchioid	Yes	Cisplatin	prox-inflam	prox.-inflam	NA	S2	AD.3	Wound healing	3.34099	3.49192	0.381364	0.667688	0.297668	0.3789	1.73333	0.708516
TCGA-50-6597-01	41.69	1	1B	79	Female	No	bronchioid	No	NA	TRU	TRU_1	Mesenchymal	S5	AD.2	IFN gamma dominant	2.81956	2.24926	0.461785	0.720963	0.748793	0.267	1.7	0.756532
TCGA-86-8074-01	0.79	0	2A	62	Female	Yes	bronchioid	No	NA	prox-inflam	prox.-inflam	Mesenchymal	S2	AD.3	IFN gamma dominant	3.0534	3.35914	0.401923	0.698037	0.595791	0.4639	2.1	0.682995
TCGA-71-6725-01	8.42	0	1B	48	Female	Yes	bronchioid	Yes	Cisplatin	TRU	TRU_1	Mesenchymal	S1	AD.2	Lymphocyte depleted	3.3901	2.76798	0.358598	0.58304	0.687059	0.6934	1.7	0.888453
TCGA-73-7499-01	50.33	1	1B	81	Female	No	bronchioid	No	NA	prox-inflam	TRU_3	NA	S4	AD.3	IFN gamma dominant	2.95869	2.84075	0.415295	0.724219	0.790323	0.5723	2.16667	0.667765
TCGA-86-A4P7-01	13.64	0	1B	63	Female	No	bronchioid	No	NA	TRU	TRU_1	Mesenchymal	S5	AD.4	IFN gamma dominant	3.49941	2.99619	0.504193	0.669319	0.543355	0.0145	2.2	0.626408
TCGA-MP-A4SW-01	58.45	1	2B	53	Male	Yes	bronchioid	No	NA	TRU	TRU_1	Mesenchymal	S5	AD.5a	IFN gamma dominant	3.46448	3.05352	0.409276	0.730357	0.825091	0.2806	2	0.713739
TCGA-49-AAQV-01	22.26	1	2	63	Female	No	bronchioid	No	NA	TRU	TRU_1	NA	S1	AD.4	IFN gamma dominant	3.62733	3.10698	0.487598	0.654326	0.664084	0.1747	2.23333	0.799531
TCGA-69-7760-01	6.64	0	2B	73	Male	No	bronchioid	Yes	NA	prox-prolif	TRU_1	Mesenchymal	S2	AD.3	Wound healing	3.46545	2.64864	0.417706	0.705686	0.374928	0.5582	2.1	0.905153
TCGA-62-8395-01	39.98	0	2B	80	Female	No	bronchioid	No	NA	TRU	prox.-prolif._2	Proliferative	S5	AD.5a	Inflammatory	2.93304	2.81959	0.478043	0.73845	0.318055	0.2137	2.43333	0.78653
TCGA-86-7714-01	20.55	1	3A	61	Female	Yes	bronchioid	No	NA	TRU	TRU_1	Mesenchymal	S5	AD.5b	Inflammatory	2.69102	2.76762	0.529253	0.657562	0.754183	0.0639	2.23333	0.760615
TCGA-50-5932-01	40.6	1	2B	75	Male	NA	bronchioid	No	NA	prox-prolif	prox.-prolif._2	NA	S5	AD.5b	Inflammatory	3.12934	2.60664	0.334674	0.567102	0.246385	0.3516	2.33333	0.881212
TCGA-J2-8192-01	24.3	0	2A	65	Female	No	bronchioid	Yes	cisplatin	TRU	TRU_1	Mesenchymal	S2	AD.3	TGF beta dominant	3.17823	3.45097	0.413618	0.717686	0.809715	0.0667	2.23333	0.517803
TCGA-38-6178-01	14.73	0	3A	70	Female	No	bronchioid	Yes	NA	TRU	TRU_1	Mesenchymal	S2	AD.2	IFN gamma dominant	3.31915	3.24152	0.474275	0.721487	0.609705	0.3904	2.16667	0.766315
TCGA-MP-A5C7-01	73.91	0	1B	76	Female	Yes	neuroendocrine	No	NA	prox-prolif	prox.-prolif._2	Proliferative	S5	AD.5b	Inflammatory	2.92426	2.44117	0.402105	0.609627	0.18239	0.2166	1.96667	0.943844
TCGA-62-8398-01	14.6	1	3A	55	Male	Yes	squamoid	Yes	NA	prox-prolif	prox.-prolif._4	Mucinous	S4	AD.1	Wound healing	2.97808	2.75658	0.372378	0.635675	0.257375	0.3034	2.46667	0.784652
TCGA-50-5939-01	15.12	1	1B	85	Male	Yes	squamoid	No	NA	prox-inflam	prox.-prolif._4	NA	S4	AD.3	Wound healing	2.63945	3.0375	0.469992	0.734949	0.350194	0.0732	2.5	0.661949
TCGA-50-8459-01	36.79	0	2B	68	Male	Yes	squamoid	Yes	Cisplatin	TRU	TRU_2	Mucinous	S5	AD.3	TGF beta dominant	2.61965	3.41664	0.487261	0.650968	0.774424	0.0065	2.53333	0.443462
TCGA-50-5068-01	49.28	1	2B	59	Female	NA	bronchioid	Yes	NA	prox-inflam	TRU_3	NA	S5	AD.4	IFN gamma dominant	1.97011	2.20821	0.47133	0.700821	0.744237	0.0115	2.83333	0.568821
TCGA-55-7728-01	23.14	0	1B	64	Female	Yes	bronchioid	No	NA	TRU	TRU_2	Mucinous	S5	AD.4	IFN gamma dominant	3.46654	3.15647	0.458541	0.745523	0.764918	0.059	2.86667	0.627331
TCGA-91-6847-01	27.68	0	1B	62	Female	Yes	squamoid	No	NA	prox-inflam	prox.-prolif._1	NA	S4	AD.1	IFN gamma dominant	2.52078	2.44967	0.368182	0.60852	0.129621	0.5998	2.26667	0.985578
TCGA-50-6595-01	6.21	1	3A	74	Female	Yes	squamoid	Yes	NA	prox-inflam	prox.-inflam	Mucinous	S3	AD.3	IFN gamma dominant	2.43749	3.08729	0.482634	0.718014	0.249085	0.0248	3.26667	0.612763
TCGA-44-6779-01	16.44	1	2B	50	Female	Yes	squamoid	Yes	NA	prox-inflam	prox.-prolif._4	Mucinous	S4	AD.2	IFN gamma dominant	2.60763	3.06587	0.439444	0.760689	0.753194	0.5993	3.03333	0.588169
TCGA-95-8494-01	2.76	0	2A	67	Male	Yes	bronchioid	No	NA	prox-inflam	prox.-inflam	Mesenchymal	S3	AD.2	IFN gamma dominant	2.97925	2.91807	0.4227	0.730897	0.643848	0.4034	3	0.79875
TCGA-67-6215-01	5.72	0	1B	52	Female	No	bronchioid	Yes	CISPLATIN	TRU	TRU_1	Mesenchymal	S5	AD.5b	Lymphocyte depleted	2.85574	2.87785	0.454092	0.731954	0.398185	0.2122	3.43333	0.839955
TCGA-50-5051-01	15.71	1	3A	42	Female	Yes	neuroendocrine	Yes	NA	prox-prolif	prox.-prolif._3	Proliferative	S4	AD.1	Wound healing	3.61666	2.8842	0.400762	0.691044	0.194555	0.5353	3.43333	0.894848
TCGA-86-8278-01	31.04	0	2B	63	Female	No	bronchioid	Yes	Cisplatin	TRU	TRU_1	Mesenchymal	S2	AD.2	IFN gamma dominant	3.0159	2.88771	0.445509	0.662821	0.618514	0.2129	3.06667	0.718157
TCGA-50-5936-01	8.45	1	3A	58	Male	NA	neuroendocrine	Yes	NA	prox-prolif	prox.-prolif._4	NA	S4	AD.3	Wound healing	2.88615	2.90736	0.402478	0.744809	0.222957	0.3737	3.53333	0.759511
TCGA-62-A470-01	39.25	1	1B	84	Male	Yes	neuroendocrine	No	NA	prox-prolif	prox.-prolif._2	Proliferative	S5	AD.5b	Lymphocyte depleted	3.80224	2.57381	0.34	0.432141	0.297234	0.5991	3.5	0.869797
TCGA-NJ-A55A-01	0.49	0	1B	76	Female	Yes	bronchioid	No	NA	TRU	TRU_3	Mesenchymal	S5	AD.4	Inflammatory	3.27742	3.20757	0.486799	0.710993	0.355019	0.0004	3.33333	0.662498
TCGA-62-A471-01	40.96	0	2B	64	Male	Yes	squamoid	Yes	Cisplatin	prox-prolif	prox.-prolif._4	Mucinous	S4	AD.3	IFN gamma dominant	3.67325	2.75655	0.419956	0.646319	0.156416	0.4409	3.03333	0.93212
TCGA-MP-A4T8-01	5.29	1	3A	68	Male	Yes	neuroendocrine	Yes	Cisplatin	prox-prolif	prox.-prolif._3	Proliferative	S4	AD.1	IFN gamma dominant	3.29249	2.72436	0.385661	0.650371	0.124017	0.3599	3.6	0.854718
TCGA-05-5715-01	2.04	0	1B	69	Female	No	bronchioid	No	NA	TRU	TRU_1	Mucinous	S2	AD.4	TGF beta dominant	2.95218	2.76585	0.427793	0.793652	0.408925	0.32	3.5	0.69798
TCGA-91-6849-01	1.15	0	3A	75	Female	Yes	bronchioid	No	NA	TRU	prox.-prolif._2	Proliferative	S5	AD.5b	Inflammatory	2.7214	2.77016	0.463895	0.71944	0.726226	0.1555	3.6	0.714231
TCGA-62-A46S-01	54.34	1	1B	73	Male	Yes	neuroendocrine	No	NA	prox-prolif	prox.-prolif._2	NA	S5	AD.5b	Inflammatory	3.50709	2.63855	0.442317	0.682966	0.341236	0.2331	3.6	0.806441
TCGA-78-7153-01	119.51	0	1B	65	Female	Yes	neuroendocrine	No	NA	prox-prolif	prox.-prolif._2	Proliferative	S5	AD.5a	Inflammatory	2.5999	2.55621	0.460347	0.686726	0.679944	0.2107	3.83333	0.876125
TCGA-95-A4VP-01	19.89	0	3A	66	Female	Yes	neuroendocrine	Yes	NA	prox-prolif	prox.-prolif._3	Proliferative	S4	AD.4	Inflammatory	3.23252	2.74092	0.459509	0.631884	0.637613	0.143	3.76667	0.710895
TCGA-55-8615-01	14.66	0	3A	67	Male	Yes	neuroendocrine	Yes	NA	prox-prolif	prox.-prolif._3	Proliferative	S4	AD.1	Wound healing	3.38317	2.55956	0.372997	0.539735	0.140887	0.6786	3.3	0.89905
TCGA-L9-A743-01	21.83	0	2A	56	Male	Yes	bronchioid	Yes	CISPLATIN	TRU	TRU_3	NA	S3	AD.4	IFN gamma dominant	3.26732	3.38378	0.476265	0.687934	0.74497	0.0135	3.9	0.56787
TCGA-05-4384-01	14.01	0	3A	66	Male	Yes	bronchioid	Yes	Cisplatin	TRU	prox.-prolif._2	Proliferative	S5	AD.5b	Inflammatory	3.37354	2.91412	0.41102	0.72522	0.222021	0.0661	3.93333	0.757744
TCGA-49-AAR3-01	62.23	0	2B	69	Male	NA	squamoid	No	NA	prox-inflam	prox.-inflam	NA	S3	AD.3	IFN gamma dominant	3.34516	3.31381	0.457204	0.680573	0.748897	0.0086	4.23333	0.567841
TCGA-78-7537-01	53.33	1	1B	72	Male	Yes	bronchioid	No	NA	TRU	prox.-prolif._2	Proliferative	S5	AD.5a	Inflammatory	2.80804	2.5593	0.570466	0.78013	0.604925	0.1285	4.43333	0.806272
TCGA-55-6642-01	80.51	0	1B	63	Male	Yes	neuroendocrine	No	NA	prox-prolif	prox.-prolif._3	Proliferative	S4	AD.4	Wound healing	2.78674	2.80805	0.414283	0.591789	0.281643	0.1444	4.06667	0.599063
TCGA-MP-A4TE-01	29.46	1	2A	56	Male	Yes	neuroendocrine	No	NA	prox-prolif	prox.-prolif._3	NA	S4	AD.1	Wound healing	3.43582	2.09389	0.402063	0.686066	0.112192	0.4476	4.1	0.950396
TCGA-49-6745-01	17.16	0	3A	82	Male	Yes	bronchioid	Yes	NA	prox-inflam	prox.-inflam	Mesenchymal	S3	AD.2	IFN gamma dominant	2.46706	2.96082	0.515172	0.752608	0.689378	0.0919	4.26667	0.615189
TCGA-64-5774-01	87.98	0	1B	60	Male	Yes	neuroendocrine	No	NA	prox-prolif	prox.-prolif._3	Proliferative	S4	AD.1	Wound healing	3.66826	2.41084	0.324158	0.553891	0.114039	0.6034	4.13333	0.907934
TCGA-55-8096-01	23.64	1	1B	67	Female	Yes	bronchioid	No	NA	TRU	TRU_1	Mesenchymal	S2	AD.3	Inflammatory	3.52258	3.30096	0.453343	0.719126	0.787879	0.0908	4.4	0.624855
TCGA-55-7815-01	25.41	0	1B	76	Male	No	neuroendocrine	Yes	NA	prox-prolif	prox.-prolif._3	Proliferative	S4	AD.5a	IFN gamma dominant	2.83857	2.82334	0.46403	0.616316	0.363869	0.1318	4.2	0.626952
TCGA-95-7948-01	15.65	0	1B	42	Female	Yes	bronchioid	No	NA	prox-inflam	TRU_1	Mesenchymal	S1	AD.3	Wound healing	2.62065	2.56638	0.39028	0.728426	0.749869	0.3733	4.73333	0.860876
TCGA-05-5423-01	4.96	0	2B	65	Male	Yes	bronchioid	No	NA	TRU	TRU_1	Mesenchymal	S5	AD.4	IFN gamma dominant	2.66767	2.65642	0.472564	0.768596	0.814851	0.3749	4.6	0.644186
TCGA-J2-8194-01	23.8	0	2B	69	Female	Yes	bronchioid	Yes	NA	prox-prolif	prox.-prolif._2	Proliferative	S5	AD.5b	Inflammatory	3.52732	2.75659	0.396352	0.62989	0.195304	0.274	4.73333	0.754549
TCGA-97-8176-01	15.39	1	3A	63	Male	Yes	squamoid	Yes	NA	prox-prolif	prox.-prolif._4	NA	S4	AD.1	Wound healing	3.38706	2.50188	0.436489	0.696463	0.224335	0.1748	4.6	0.812089
TCGA-NJ-A4YG-01	74.33	0	1B	65	Male	Yes	bronchioid	No	NA	TRU	TRU_1	NA	S5	AD.5a	IFN gamma dominant	3.31655	3.14193	0.510265	0.667493	0.807865	0.1185	4.43333	0.716986
TCGA-86-8359-01	14.6	1	3A	52	Male	Yes	neuroendocrine	No	NA	prox-prolif	prox.-prolif._3	Proliferative	S4	AD.1	Inflammatory	3.68393	2.97741	0.412812	0.754279	0.20346	0.3875	4.83333	0.747746
TCGA-78-7633-01	50.24	1	1B	67	Male	Yes	bronchioid	No	NA	prox-prolif	prox.-prolif._2	Proliferative	S5	AD.5b	Inflammatory	2.7959	2.43605	0.331691	0.682126	0.244632	0.3107	4.8	0.897744
TCGA-62-A46R-01	56.71	1	1B	54	Female	Yes	bronchioid	No	NA	prox-inflam	TRU_1	Mesenchymal	S3	AD.2	IFN gamma dominant	3.43124	3.11517	0.467069	0.694646	0.309	0.3944	5.66667	0.719554
TCGA-69-8253-01	14.01	0	2A	59	Female	Yes	bronchioid	Yes	Cisplatin	TRU	prox.-prolif._2	NA	S5	AD.5b	Inflammatory	3.20776	2.5938	0.419119	0.636483	0.361775	0.2314	4.4	0.84734
TCGA-97-8174-01	5.39	1	2A	67	Male	Yes	bronchioid	Yes	CISplatinum	TRU	prox.-prolif._2	Proliferative	S5	AD.4	Inflammatory	2.92793	2.90296	0.470084	0.625161	0.380065	0.2982	5.26667	0.656101
TCGA-55-7914-01	6.15	1	2A	71	Female	Yes	bronchioid	Yes	NA	TRU	TRU_1	Mesenchymal	S5	AD.5a	Inflammatory	2.91581	2.97142	0.482601	0.684313	0.275721	0.255	5.36667	0.775351
TCGA-MP-A4SY-01	49.35	1	2B	61	Male	Yes	bronchioid	No	NA	prox-inflam	prox.-inflam	NA	S2	AD.2	Wound healing	3.18079	3.371	0.493602	0.670019	0.330279	0.0944	5.26667	0.745927
TCGA-97-A4LX-01	20.19	0	1B	81	Male	Yes	bronchioid	No	NA	prox-inflam	TRU_1	NA	S3	AD.4	IFN gamma dominant	2.9993	2.95331	0.496142	0.652495	0.815122	0.0346	5	0.483504
TCGA-55-6970-01	15.25	1	3A	67	Female	Yes	neuroendocrine	Yes	Cisplatin	prox-prolif	prox.-prolif._4	NA	S5	AD.4	IFN gamma dominant	2.96551	2.80381	0.44807	0.703914	0.610486	0.2406	5.86667	0.725456
TCGA-78-7535-01	31.2	1	1B	45	Male	Yes	bronchioid	Yes	Cisplatin	prox-inflam	TRU_1	Mesenchymal	S1	AD.2	Lymphocyte depleted	3.64246	2.64268	0.501696	0.801727	0.739526	0.7843	4.86667	0.737353
TCGA-55-8508-01	20.28	0	2A	60	Female	Yes	neuroendocrine	Yes	Cisplatin	prox-prolif	prox.-prolif._3	NA	S4	AD.1	Wound healing	3.15869	2.53529	0.404663	0.619085	0.653952	0.1802	5.5	0.772958
TCGA-97-7547-01	64.6	0	1B	67	Female	Yes	bronchioid	Yes	Cisplatin	TRU	TRU_1	Mucinous	S5	AD.5b	Inflammatory	3.15644	2.84184	0.471061	0.717882	0.701656	0.348	5.26667	0.767623
TCGA-67-6217-01	13.87	0	2A	73	Female	Yes	bronchioid	Yes	NA	TRU	TRU_1	NA	S5	AD.4	Inflammatory	3.44031	2.95074	0.441418	0.710587	0.819996	0.4314	5.9	0.702376
TCGA-78-7161-01	9.57	1	2B	69	Female	Yes	neuroendocrine	Yes	Cisplatin	prox-prolif	prox.-prolif._3	Proliferative	S4	AD.1	IFN gamma dominant	4.01366	2.79154	0.3974	0.632453	0.111099	0.4864	5.73333	0.896433
TCGA-91-7771-01	16.18	0	2B	62	Male	Yes	neuroendocrine	Yes	Cisplatin	TRU	prox.-prolif._2	Proliferative	S5	AD.5b	Inflammatory	3.21516	2.88758	0.482076	0.728102	0.716609	0.2558	6.16667	0.597035
TCGA-78-7152-01	39.94	1	1B	65	Male	Yes	bronchioid	No	NA	TRU	prox.-prolif._2	NA	S5	AD.5a	Inflammatory	2.78256	2.75066	0.403628	0.729571	0.764134	0.1601	6.03333	0.755944
TCGA-55-8204-01	16.93	0	1B	87	Female	Yes	squamoid	No	NA	prox-inflam	TRU_3	Mucinous	S4	NA	Wound healing	2.84399	2.88972	0.454876	0.666898	0.225285	0.2783	6.43333	0.757109
TCGA-44-A47A-01	15.32	0	1B	78	Female	Yes	bronchioid	No	NA	TRU	TRU_1	NA	S5	AD.5a	IFN gamma dominant	3.08572	2.73255	0.466208	0.759998	0.767502	0.1272	7.03333	0.720124
TCGA-86-8054-01	37.74	0	2B	61	Male	Yes	neuroendocrine	Yes	Cisplatin	prox-prolif	prox.-prolif._3	Proliferative	S4	AD.1	Wound healing	3.01095	2.0958	0.350251	0.487524	0.133363	0.6	6.66667	0.913791
TCGA-78-7166-01	8.48	1	2B	84	Male	Yes	neuroendocrine	No	NA	prox-prolif	prox.-prolif._4	Mucinous	S4	AD.1	Wound healing	3.41454	2.55122	0.372559	0.674682	0.209995	0.0935	6.46667	0.884283
TCGA-55-7724-01	23.18	0	1B	76	Female	Yes	squamoid	No	NA	prox-inflam	prox.-prolif._1	Mucinous	S5	NA	IFN gamma dominant	3.81972	2.98673	0.453246	0.666405	0.710767	0.019	7.13333	0.610689
TCGA-78-7148-01	20.58	1	2B	71	Male	Yes	neuroendocrine	No	NA	prox-prolif	prox.-prolif._4	Mucinous	S5	AD.1	IFN gamma dominant	2.95141	2.35641	0.382443	0.622385	0.313921	0.2875	7.1	0.828994
TCGA-55-6971-01	46.03	0	1B	59	Female	Yes	neuroendocrine	No	NA	prox-prolif	prox.-prolif._3	Proliferative	S3	AD.4	IFN gamma dominant	2.6953	2.83054	0.456257	0.686306	0.737281	0.0622	6.76667	0.552621
TCGA-49-6744-01	55.33	0	2A	64	Female	Yes	bronchioid	Yes	NA	TRU	TRU_1	Mesenchymal	S5	AD.4	IFN gamma dominant	2.94441	3.11451	0.518703	0.691598	0.827293	0.0901	7.43333	0.519552
TCGA-55-A494-01	15.81	0	1B	61	Female	Yes	neuroendocrine	No	NA	prox-prolif	TRU_1	Proliferative	S4	AD.1	Wound healing	4.11897	2.704	0.332723	0.623242	0.132814	0.3316	7.06667	0.971602
TCGA-55-6981-01	45.34	1	3A	53	Female	Yes	bronchioid	Yes	NA	prox-inflam	prox.-inflam	Mesenchymal	S2	AD.3	Wound healing	3.20392	3.0732	0.472311	0.686648	0.385662	0.2902	6.76667	0.805203
TCGA-55-8614-01	17.62	0	1B	76	Male	Yes	squamoid	No	NA	prox-inflam	prox.-prolif._1	NA	S4	NA	Wound healing	3.07571	2.90381	0.392794	0.552919	0.207546	0.332	6.76667	0.798682
TCGA-78-8660-01	10.55	1	2B	69	Male	Yes	bronchioid	No	NA	prox-inflam	prox.-inflam	Mesenchymal	S3	AD.2	IFN gamma dominant	3.50162	2.82212	0.443269	0.631265	0.693614	0.0071	7.36667	0.680029
TCGA-55-7727-01	3.91	0	3A	70	Male	Yes	bronchioid	No	NA	prox-prolif	TRU_1	Mesenchymal	S5	AD.2	IFN gamma dominant	3.31076	2.98248	0.448598	0.663733	0.40772	0.2006	7.3	0.770179
TCGA-95-A4VK-01	21.4	0	3A	74	Female	Yes	neuroendocrine	Yes	Cisplatin	prox-prolif	prox.-prolif._2	NA	S5	AD.4	IFN gamma dominant	3.66955	2.82104	0.425892	0.686184	0.163202	0.1907	7.5	0.805894
TCGA-MP-A4TI-01	14.1	1	2A	72	Male	Yes	squamoid	No	NA	prox-inflam	prox.-inflam	NA	S3	AD.2	IFN gamma dominant	2.85391	3.26913	0.48848	0.743234	0.746213	0.0114	6.86667	0.44358
TCGA-MP-A4TC-01	2.43	1	3A	77	Male	Yes	bronchioid	Yes	Cisplatin	prox-inflam	prox.-inflam	Mesenchymal	S3	AD.2	IFN gamma dominant	3.04118	3.03545	0.455263	0.720901	0.329346	0.1356	7.6	0.625867
TCGA-97-8172-01	17.92	0	1B	75	Female	Yes	bronchioid	No	NA	TRU	TRU_1	Proliferative	S5	AD.5a	Inflammatory	3.49447	2.90872	0.448017	0.699962	0.630149	0.1214	8.23333	0.58028
TCGA-78-7154-01	19.5	1	3A	72	Male	Yes	bronchioid	No	NA	prox-prolif	prox.-prolif._4	Mucinous	S4	AD.1	Wound healing	2.82151	2.27954	0.415212	0.748909	0.197448	0.3566	7	0.869516
TCGA-55-A493-01	0.92	0	1B	54	Female	Yes	bronchioid	No	NA	prox-inflam	prox.-inflam	Mesenchymal	S3	AD.2	Wound healing	3.25873	3.07579	0.491688	0.684272	0.67639	0.0981	7.86667	0.662961
TCGA-86-8056-01	4.57	0	3A	63	Female	Yes	bronchioid	No	NA	TRU	TRU_3	NA	S5	AD.5a	Inflammatory	3.10618	2.90068	0.421932	0.662585	0.593952	0.1241	8.56667	0.758737
TCGA-78-7540-01	39.35	1	1B	66	Female	No	bronchioid	No	NA	TRU	TRU_2	Mucinous	S5	AD.5b	IFN gamma dominant	2.92207	3.11212	0.412545	0.707039	0.369958	0.1948	7.56667	0.854238
TCGA-55-8514-01	17.1	0	1B	70	Female	Yes	bronchioid	No	NA	TRU	TRU_1	Mesenchymal	S1	AD.2	IFN gamma dominant	3.30654	2.92092	0.347133	0.512007	0.593454	0.8013	8.33333	0.815158
TCGA-62-A46P-01	19.53	1	1B	65	Male	Yes	neuroendocrine	No	NA	prox-prolif	prox.-prolif._2	Proliferative	S5	AD.5a	Inflammatory	3.03687	2.18073	0.532445	0.756508	0.245097	0.225	8.4	0.866845
TCGA-49-6742-01	16.04	1	2A	70	Male	Yes	neuroendocrine	Yes	Cisplatin	prox-prolif	prox.-prolif._4	Mucinous	S4	AD.1	IFN gamma dominant	3.91148	2.63252	0.331523	0.551108	0.255779	0.1343	7.86667	0.905099
TCGA-55-8301-01	17.56	0	1B	58	Male	Yes	bronchioid	Yes	NA	prox-inflam	TRU_1	Mesenchymal	S3	AD.3	IFN gamma dominant	2.91491	2.94745	0.459049	0.693544	0.755131	0.0758	8.73333	0.546615
TCGA-55-6972-01	53.65	1	1B	72	Male	Yes	bronchioid	No	NA	prox-prolif	prox.-prolif._2	Proliferative	S5	AD.5b	Lymphocyte depleted	2.86964	1.91736	0.387604	0.681245	0.177217	0.4609	8.83333	0.981717
TCGA-86-8672-01	0.62	1	2B	59	Male	No	squamoid	No	NA	prox-inflam	prox.-prolif._4	Proliferative	S4	AD.2	IFN gamma dominant	3.09688	2.91277	0.440804	0.728648	0.719941	0.0475	8.73333	0.655335
TCGA-44-A479-01	15.98	0	1B	73	Female	Yes	neuroendocrine	No	NA	prox-prolif	prox.-prolif._3	Proliferative	S4	AD.3	IFN gamma dominant	3.23105	2.78591	0.462617	0.641883	0.343745	0.0803	9.3	0.522418
TCGA-05-4417-01	14.96	0	1B	51	Female	Yes	neuroendocrine	No	NA	prox-prolif	prox.-prolif._3	Proliferative	S4	AD.1	TGF beta dominant	3.19583	2.73529	0.441049	0.631441	0.586324	0.2699	9.56667	0.530273
TCGA-50-5931-01	14.27	1	1B	75	Female	Yes	squamoid	No	NA	prox-prolif	prox.-prolif._1	Mucinous	S4	AD.1	Wound healing	3.09009	2.42114	0.444237	0.670992	0.120149	0.4539	9.23333	0.914126
TCGA-86-8674-01	26.5	0	2A	50	Male	Yes	neuroendocrine	Yes	Cisplatin	prox-prolif	prox.-prolif._2	NA	S5	AD.5b	Wound healing	3.44395	2.25522	0.3902	0.638939	0.193367	0.1477	9	0.938379
TCGA-55-8207-01	32.12	0	1B	73	Male	Yes	bronchioid	No	NA	TRU	TRU_1	Mesenchymal	S5	AD.5a	Inflammatory	3.19938	3.01661	0.450993	0.694212	0.59055	0.4614	9.23333	0.619563
TCGA-50-6593-01	11.05	1	3A	49	Female	Yes	bronchioid	No	NA	prox-inflam	TRU_3	Mesenchymal	S2	AD.4	Wound healing	3.4467	3.0748	0.496112	0.707442	0.712539	0.209	9.53333	0.651186
TCGA-55-8510-01	17.72	0	1B	55	Female	Yes	bronchioid	No	NA	TRU	TRU_1	Mesenchymal	S3	AD.3	IFN gamma dominant	3.23555	3.2673	0.437256	0.752789	0.815196	0.1246	9.1	0.59038
TCGA-86-7713-01	38.04	0	2A	70	Male	No	neuroendocrine	Yes	Cisplatin	prox-prolif	prox.-prolif._3	Proliferative	S4	AD.1	IFN gamma dominant	3.78581	2.19163	0.435104	0.587172	0.159256	0.3677	10	0.938771
TCGA-49-6761-01	11.64	0	3A	68	Female	Yes	bronchioid	No	NA	prox-inflam	prox.-inflam	Mesenchymal	S3	AD.2	IFN gamma dominant	3.39487	3.01924	0.483787	0.674916	0.623912	0.1291	9.43333	0.742002
TCGA-78-7147-01	19.27	1	2B	67	Female	Yes	bronchioid	No	NA	TRU	TRU_3	NA	S1	AD.5b	IFN gamma dominant	3.21079	2.90517	0.365641	0.737765	0.731449	0.5989	10.2	0.862966
TCGA-MP-A4SV-01	86.14	1	1B	67	Male	Yes	bronchioid	No	NA	prox-inflam	TRU_1	Mesenchymal	S3	AD.2	IFN gamma dominant	3.40596	2.97305	0.378559	0.568371	0.250789	0.1932	9.96667	0.722449
TCGA-MP-A4TK-01	19.13	1	2B	56	Female	Yes	bronchioid	No	NA	prox-inflam	prox.-inflam	Mesenchymal	S3	AD.2	Wound healing	3.31779	3.31738	0.455853	0.706604	0.654302	0.1971	10.5333	0.55658
TCGA-55-A48Y-01	20.71	0	2A	69	Male	Yes	neuroendocrine	Yes	NA	prox-prolif	prox.-prolif._4	NA	S4	AD.4	Wound healing	2.76687	2.53568	0.499852	0.640425	0.195384	0.1886	10.4333	0.738875
TCGA-73-4658-01	52.6	1	1B	80	Female	Yes	bronchioid	No	NA	prox-inflam	prox.-inflam	Mesenchymal	S2	AD.2	Inflammatory	2.55245	2.96741	0.516966	0.748503	0.803149	0.0648	10.7333	0.505467
TCGA-95-7562-01	2.86	1	2A	71	Male	Yes	bronchioid	Yes	CISPLATIN	prox-inflam	prox.-prolif._1	Proliferative	S4	AD.1	IFN gamma dominant	2.23049	2.56982	0.387471	0.686484	0.71988	0.4101	13.1333	0.772024
TCGA-05-5428-01	22.03	0	2A	57	Male	Yes	bronchioid	Yes	Cisplatin	prox-inflam	prox.-inflam	Mesenchymal	S3	AD.2	IFN gamma dominant	1.9339	2.23409	0.391663	0.7243	0.409644	0.5655	11.7	0.737422
TCGA-78-7542-01	10.55	1	1B	56	Male	Yes	squamoid	No	NA	prox-inflam	prox.-inflam	Mucinous	S4	AD.2	IFN gamma dominant	2.83317	3.10799	0.402377	0.630518	0.267214	0.4019	10.9333	0.901049
TCGA-55-A48X-01	22.65	0	2A	63	Female	Yes	bronchioid	Yes	NA	TRU	TRU_3	Mesenchymal	S5	AD.4	Inflammatory	3.28508	3.14159	0.486663	0.716926	0.606342	0.0066	12.1333	0.676072
TCGA-49-AAR2-01	73.12	0	1B	64	Male	Yes	neuroendocrine	Yes	NA	prox-prolif	prox.-prolif._2	NA	S4	AD.5b	IFN gamma dominant	3.25627	2.35899	0.317282	0.516062	0.587926	0.2466	12.1333	0.815936
TCGA-05-4405-01	20.05	0	1B	74	Female	Yes	bronchioid	No	NA	TRU	TRU_1	Mesenchymal	S2	AD.2	Inflammatory	3.20146	3.07052	0.50093	0.696643	0.241957	0.3903	12.1333	0.67837
TCGA-97-A4M0-01	21.44	0	1B	60	Female	Yes	bronchioid	No	NA	TRU	TRU_1	NA	S5	AD.5a	IFN gamma dominant	3.18606	3.05771	0.454833	0.754955	0.796246	0.2992	11.5333	0.722492
TCGA-50-5941-01	48.46	0	3A	55	Female	Yes	bronchioid	Yes	Cisplatin	prox-inflam	prox.-inflam	Mesenchymal	S3	AD.4	IFN gamma dominant	2.78756	2.94616	0.519347	0.670423	0.901398	0.1134	12.2	0.558996
TCGA-78-7150-01	21.9	1	2B	59	Male	Yes	squamoid	Yes	NA	prox-prolif	prox.-prolif._4	NA	S4	AD.1	IFN gamma dominant	3.52009	2.52892	0.407382	0.636121	0.173711	0.4589	12.2	0.858978
TCGA-MP-A4TF-01	11.05	1	2A	58	Female	Yes	squamoid	Yes	Cisplatin	prox-prolif	prox.-prolif._4	Mucinous	S4	AD.3	IFN gamma dominant	3.18615	2.86489	0.391575	0.728876	0.155783	0.4141	12.6333	0.90072
TCGA-NJ-A4YI-01	0.13	1	3A	87	Female	Yes	bronchioid	No	NA	TRU	TRU_1	Mesenchymal	S5	AD.5a	Inflammatory	3.68597	2.86315	0.418179	0.741176	0.590801	0.2579	13.1	0.74758
TCGA-91-A4BC-01	1.45	0	2A	59	Male	Yes	neuroendocrine	No	NA	prox-prolif	prox.-prolif._3	NA	S4	AD.3	IFN gamma dominant	3.18879	2.79889	0.450528	0.700298	0.323529	0.0734	13.4333	0.521785
TCGA-97-7937-01	18.54	0	1B	65	Male	Yes	bronchioid	No	NA	prox-inflam	TRU_1	Mesenchymal	S1	AD.2	Wound healing	3.49183	3.01326	0.368596	0.662351	0.235817	0.4496	14.8333	0.861566
TCGA-97-7554-01	25.48	0	3A	83	Female	Yes	bronchioid	Yes	NA	prox-inflam	prox.-inflam	Mesenchymal	S2	AD.2	IFN gamma dominant	3.14769	3.30475	0.411585	0.731027	0.6779	0.3163	13.8667	0.651856
TCGA-44-7671-01	29.23	0	1B	64	Male	Yes	neuroendocrine	No	NA	prox-prolif	prox.-prolif._2	Proliferative	S5	AD.5b	Wound healing	2.88014	2.79795	0.41742	0.701241	0.195984	0.3154	13.3	0.842149
TCGA-64-5778-01	42.9	0	1B	60	Male	Yes	bronchioid	Yes	NA	prox-inflam	TRU_1	Mesenchymal	S3	AD.4	IFN gamma dominant	2.69057	2.66524	0.390639	0.68796	0.837417	0.3264	14.1667	0.696852
TCGA-MN-A4N1-01	27.19	0	2A	60	Male	Yes	bronchioid	No	NA	prox-inflam	TRU_1	NA	S1	AD.2	Wound healing	3.48548	2.79107	0.380471	0.637492	0.177914	0.4939	13.5667	0.892277
TCGA-95-A4VN-01	18.18	0	2A	62	Female	Yes	bronchioid	No	NA	prox-inflam	prox.-inflam	Mesenchymal	S3	AD.2	IFN gamma dominant	3.04118	3.03696	0.469224	0.657201	0.679767	0.1669	14.0667	0.645405
TCGA-99-7458-01	24.56	0	3A	74	Female	Yes	bronchioid	Yes	NA	TRU	TRU_1	Mesenchymal	S5	AD.4	Inflammatory	3.30454	3.19522	0.515514	0.709755	0.784911	0.0061	14.6333	0.594951
TCGA-55-7283-01	20.02	0	3A	76	Female	Yes	bronchioid	Yes	NA	TRU	TRU_1	Mesenchymal	S5	AD.5a	IFN gamma dominant	3.15047	2.80053	0.485583	0.715796	0.783145	0.2525	14.0667	0.778283
TCGA-99-8025-01	34.85	0	3A	72	Female	Yes	bronchioid	Yes	NA	TRU	TRU_3	Mesenchymal	S1	AD.2	IFN gamma dominant	3.51222	3.11965	0.422184	0.605041	0.221362	0.5108	14.5	0.813593
TCGA-55-8616-01	1.58	0	1B	58	Female	Yes	bronchioid	No	NA	TRU	TRU_3	Mesenchymal	S1	AD.2	Inflammatory	3.57439	2.88041	0.395426	0.699916	0.292724	0.3848	14.3667	0.826163
TCGA-86-8673-01	28.34	0	1B	61	Male	Yes	bronchioid	No	NA	prox-inflam	prox.-inflam	Proliferative	S4	AD.2	Wound healing	3.3264	2.96028	0.475362	0.741537	0.232118	0.2147	14.5667	0.782755
TCGA-78-7539-01	26.01	0	2A	75	Female	Yes	bronchioid	Yes	Cisplatin	TRU	TRU_1	Mesenchymal	S5	AD.5b	IFN gamma dominant	3.68749	2.68599	0.428935	0.668128	0.858054	0.3206	14.4	0.70843
TCGA-49-6767-01	22.26	0	2B	46	Female	Yes	squamoid	No	NA	prox-inflam	prox.-inflam	Mesenchymal	S3	AD.3	IFN gamma dominant	3.48586	3.29162	0.394819	0.6273	0.390478	0.335	14.0333	0.765809
TCGA-55-6985-01	40.54	0	1B	58	Female	Yes	bronchioid	No	NA	prox-inflam	TRU_3	Mesenchymal	S2	AD.4	IFN gamma dominant	3.09917	3.26468	0.472724	0.66764	0.693219	0.2	14.6	0.639605
TCGA-64-1679-01	81.8	0	3A	58	Female	Yes	bronchioid	Yes	Cisplatin	prox-inflam	prox.-inflam	Mesenchymal	S2	AD.3	Wound healing	3.01156	3.14451	0.428169	0.717006	0.724974	0.1979	16	0.645265
TCGA-86-8279-01	31.2	0	2A	46	Male	No	bronchioid	Yes	Cisplatin	prox-inflam	TRU_1	Mesenchymal	S1	AD.3	Wound healing	3.42708	2.80718	0.350593	0.619059	0.361509	0.5986	15.2667	0.799887
TCGA-55-8205-01	19.69	0	2A	76	Female	Yes	bronchioid	Yes	NA	prox-inflam	prox.-inflam	Mesenchymal	S3	AD.2	IFN gamma dominant	2.91014	3.13736	0.416297	0.712564	0.804236	0.1046	15.8333	0.545543
TCGA-55-7574-01	32.71	1	1B	64	Female	Yes	bronchioid	Yes	NA	TRU	TRU_1	Proliferative	S3	AD.4	Inflammatory	3.44894	3.38738	0.493205	0.670578	0.38568	0.0385	16.4333	0.530251
TCGA-62-8399-01	88.63	0	3A	62	Male	Yes	neuroendocrine	No	NA	prox-prolif	prox.-prolif._1	Proliferative	S1	AD.3	Wound healing	3.57832	2.39016	0.389779	0.433589	0.166144	0.4884	15.5667	0.818861
TCGA-93-8067-01	6.12	0	1B	77	Male	Yes	neuroendocrine	No	NA	prox-prolif	prox.-prolif._4	NA	S4	AD.2	IFN gamma dominant	3.13759	2.5123	0.473839	0.760401	0.23249	0.3251	15	0.87013
TCGA-53-A4EZ-01	35.21	0	2A	63	Male	Yes	neuroendocrine	Yes	Cisplatin	prox-prolif	prox.-prolif._3	Proliferative	S4	AD.4	IFN gamma dominant	3.26533	2.49848	0.379075	0.76855	0.185348	0.6586	15.0667	0.913494
TCGA-NJ-A4YP-01	1.64	0	1B	52	Male	Yes	squamoid	No	NA	prox-prolif	prox.-prolif._4	Mucinous	S4	AD.2	Wound healing	3.08813	2.93723	0.460613	0.612741	0.263703	0.1272	15.6	0.69699
TCGA-05-4390-01	37.02	0	1B	58	Female	Yes	neuroendocrine	Yes	Cisplatin	prox-prolif	prox.-prolif._3	Proliferative	S4	AD.1	Wound healing	3.24832	2.58225	0.413732	0.579653	0.178492	0.3056	17.2667	0.803509
TCGA-49-AAR4-01	28.9	1	3A	51	Male	Yes	bronchioid	Yes	NA	prox-inflam	TRU_3	NA	S3	AD.3	IFN gamma dominant	3.48368	3.19968	0.433642	0.732521	0.25388	0.0166	17.6333	0.652578
TCGA-86-8585-01	11.61	0	1B	57	Male	No	squamoid	No	NA	prox-inflam	prox.-prolif._4	Mucinous	S4	AD.3	IFN gamma dominant	3.86592	2.77393	0.427219	0.645502	0.642775	0.082	17.6667	0.684234
TCGA-55-8511-01	18.15	0	1B	73	Female	Yes	bronchioid	No	NA	prox-inflam	prox.-inflam	NA	S3	AD.2	Inflammatory	3.25059	3.12006	0.449303	0.737688	0.726422	0.1225	17.1333	0.643378
TCGA-55-8092-01	5.06	1	2B	75	Male	Yes	squamoid	No	NA	prox-prolif	prox.-prolif._4	NA	S4	AD.2	IFN gamma dominant	2.99097	2.63925	0.340347	0.663605	0.718192	0.3084	16.4667	0.6748
TCGA-05-5425-01	29	0	2B	68	Male	Yes	neuroendocrine	Yes	NA	prox-prolif	prox.-prolif._4	Mucinous	S4	AD.3	IFN gamma dominant	2.93807	2.6246	0.398692	0.664763	0.77392	0.2551	17.9	0.628098
TCGA-44-8120-01	8.55	0	1B	58	Male	Yes	bronchioid	No	NA	TRU	TRU_1	Mesenchymal	S1	AD.2	Inflammatory	3.13453	2.76693	0.406801	0.739994	0.239178	0.3716	18.1333	0.737375
TCGA-55-6979-01	7.79	1	2B	59	Female	Yes	bronchioid	Yes	NA	prox-inflam	prox.-inflam	Mesenchymal	S3	AD.3	IFN gamma dominant	3.08054	3.12006	0.489353	0.737423	0.808616	0.0568	17.9	0.489647
TCGA-44-8119-01	9.37	0	2B	73	Male	Yes	neuroendocrine	No	NA	prox-prolif	prox.-prolif._3	Proliferative	S4	AD.1	Wound healing	3.11814	2.68213	0.313417	0.387681	0.264242	0.4008	19.3667	0.670288
TCGA-44-6774-01	21.63	0	3A	56	Female	Yes	neuroendocrine	Yes	Cisplatin	prox-inflam	prox.-prolif._3	Proliferative	S2	AD.3	Wound healing	2.73281	3.06995	0.45529	0.609232	0.281536	0.203	18.3667	0.54024
TCGA-49-AAR9-01	8.55	1	2B	61	Male	Yes	squamoid	No	NA	prox-prolif	prox.-prolif._4	NA	S4	AD.1	Wound healing	3.22361	2.70069	0.324097	0.619862	0.210486	0.4853	18.9	0.925987
TCGA-91-6829-01	41.36	1	1B	78	Male	Yes	bronchioid	No	NA	prox-inflam	prox.-prolif._1	Mesenchymal	S2	AD.1	Wound healing	3.19742	3.00232	0.417233	0.669369	0.222488	0.402	19.5	0.708123
TCGA-78-7536-01	8.02	1	3A	69	Male	Yes	neuroendocrine	No	NA	prox-prolif	prox.-prolif._3	Proliferative	S4	AD.1	IFN gamma dominant	3.50544	2.30031	0.327072	0.492339	0.288606	0.7212	19.8333	0.820701
TCGA-55-8302-01	15.71	0	1B	54	Male	Yes	bronchioid	No	NA	prox-inflam	prox.-inflam	Mesenchymal	S3	AD.2	IFN gamma dominant	3.37518	3.03003	0.487559	0.747222	0.362389	0.1708	20.5	0.793593
TCGA-78-8640-01	232.17	0	2A	59	Male	Yes	bronchioid	No	NA	prox-prolif	prox.-prolif._1	Mucinous	S4	AD.1	IFN gamma dominant	3.87686	2.54893	0.437179	0.731764	0.608773	0.1728	21.7667	0.845191
TCGA-05-4424-01	30.02	0	2B	70	Male	Yes	bronchioid	No	NA	TRU	prox.-prolif._1	Proliferative	S5	AD.3	IFN gamma dominant	3.39285	2.6583	0.436416	0.674292	0.606908	0.2161	22.4	0.669762
TCGA-44-8117-01	12.66	0	1B	54	Female	Yes	bronchioid	Yes	Cisplatin	prox-inflam	prox.-inflam	Mesenchymal	S1	AD.2	Wound healing	3.8485	3.07389	0.417904	0.621203	0.288056	0.6349	22.7	0.79363
TCGA-38-4631-01	11.64	1	1B	72	Female	Yes	neuroendocrine	No	NA	prox-prolif	prox.-prolif._4	Mucinous	S4	AD.1	IFN gamma dominant	2.85884	1.97471	0.42974	0.692678	0.255982	0.4032	22.9	0.847051
TCGA-44-6777-01	32.45	1	1B	85	Female	Yes	bronchioid	No	NA	prox-inflam	prox.-inflam	Mesenchymal	S2	AD.4	Inflammatory	2.37843	3.0129	0.479021	0.670518	0.830686	0.1046	22.2667	0.390154
TCGA-L9-A8F4-01	15.65	0	1B	64	Female	Yes	neuroendocrine	No	NA	prox-inflam	prox.-prolif._1	NA	S3	AD.4	IFN gamma dominant	3.49691	2.55059	0.405967	0.658379	0.589596	0.1304	23.1333	0.680545
TCGA-55-7576-01	22.03	0	1B	54	Male	Yes	bronchioid	Yes	Cisplatin	prox-inflam	prox.-inflam	Mesenchymal	S2	AD.2	IFN gamma dominant	3.21371	2.79047	0.454656	0.711096	0.606615	0.4404	24.2	0.731622
TCGA-62-A46O-01	47.8	1	1B	65	Female	Yes	squamoid	No	NA	prox-prolif	prox.-prolif._4	Proliferative	S4	AD.1	IFN gamma dominant	3.76284	2.6858	0.314972	0.586529	0.125533	0.6086	26.5667	0.985471
TCGA-86-6851-01	5.88	0	2A	73	Female	Yes	bronchioid	No	NA	prox-inflam	TRU_1	Mesenchymal	S3	AD.3	IFN gamma dominant	3.30521	3.18	0.407284	0.701369	0.829063	0.1787	27.8667	0.585817
TCGA-95-7567-01	18.67	0	2B	61	Male	Yes	bronchioid	Yes	Cisplatin	prox-inflam	prox.-inflam	Mesenchymal	S1	AD.2	IFN gamma dominant	3.23578	2.7091	0.467633	0.718703	0.37025	0.3249	28.2	0.755062
TCGA-73-A9RS-01	11.18	1	2B	41	Male	Yes	neuroendocrine	Yes	NA	prox-prolif	prox.-prolif._4	NA	S4	AD.1	Wound healing	3.29911	2.26774	0.406095	0.618544	0.218129	0.6599	28.2667	0.911935
TCGA-86-8358-01	21.47	0	1B	44	Male	Yes	neuroendocrine	No	NA	prox-prolif	prox.-prolif._1	Proliferative	S4	AD.1	Wound healing	3.75619	2.64194	0.352902	0.545927	0.16677	0.5293	31.7667	0.877452
TCGA-05-4410-01	0	0	1B	62	Male	Yes	bronchioid	No	NA	TRU	TRU_3	Mesenchymal	S3	AD.2	IFN gamma dominant	3.45086	3.05929	0.43833	0.710281	0.847584	0.3183	33.6667	0.701852
TCGA-64-5781-01	51.25	0	1B	55	Female	Yes	squamoid	Yes	Cisplatin	prox-inflam	prox.-prolif._4	Mucinous	S4	AD.3	IFN gamma dominant	2.37563	2.62594	0.432216	0.74049	0.580864	0.1808	34.1333	0.694671
TCGA-44-7662-01	7.17	0	1B	61	Male	Yes	squamoid	No	NA	prox-inflam	prox.-inflam	Mesenchymal	S3	AD.2	IFN gamma dominant	3.27594	3.15087	0.45577	0.730487	0.234816	0.2739	36.0667	0.610459
TCGA-78-8662-01	110.5	1	1B	53	Female	Yes	bronchioid	No	NA	prox-prolif	TRU_1	NA	S1	AD.3	Wound healing	3.70021	1.98416	0.327944	0.500596	0.184419	0.7394	33.7	0.928004
TCGA-50-5930-01	9.27	1	3A	47	Male	NA	neuroendocrine	Yes	NA	prox-prolif	prox.-prolif._4	Proliferative	S4	AD.3	Wound healing	3.7154	2.90597	0.442088	0.673822	0.315745	0.1503	34.3333	0.667916
TCGA-55-7907-01	11.28	1	2A	77	Male	Yes	bronchioid	No	NA	prox-inflam	TRU_1	Mesenchymal	S3	AD.2	IFN gamma dominant	3.74317	3.20445	0.412407	0.690773	0.393554	0.3482	35.5667	0.700801
TCGA-53-7626-01	30.54	1	2A	76	Female	Yes	bronchioid	Yes	Cisplatin	TRU	TRU_1	Mesenchymal	S5	AD.4	Inflammatory	2.89581	2.84707	0.467784	0.700497	0.816507	0.2535	34.9667	0.557775
TCGA-95-7039-01	41.82	0	2B	54	Female	Yes	bronchioid	No	NA	prox-inflam	prox.-inflam	Mesenchymal	S1	AD.2	Wound healing	3.19747	3.09487	0.404111	0.670326	0.308279	0.4482	40.2667	0.796037
TCGA-55-A490-01	3.25	1	2A	78	Male	Yes	bronchioid	Yes	NA	prox-inflam	prox.-inflam	NA	S3	AD.2	Wound healing	3.12161	2.16278	0.350821	0.542633	0.614017	0.5419	39.8667	0.75273
TCGA-86-A4JF-01	24.23	1	2B	56	Male	Yes	bronchioid	Yes	NA	prox-inflam	TRU_1	NA	S1	AD.2	IFN gamma dominant	2.78322	2.64531	0.456427	0.74337	0.781203	0.1097	41	0.757355
TCGA-86-8073-01	24.33	0	1B	58	Male	Yes	bronchioid	No	NA	TRU	prox.-prolif._1	Mucinous	S1	AD.2	Lymphocyte depleted	3.31136	2.93991	0.463146	0.59778	0.308631	0.2307	44.5333	0.75062
TCGA-78-7155-01	38.5	1	1B	68	Male	Yes	neuroendocrine	Yes	NA	prox-inflam	prox.-prolif._1	Proliferative	S4	AD.1	Wound healing	2.77142	1.88315	0.239675	0.331648	0.214153	0.4353	46.8333	0.952153
TCGA-L9-A7SV-01	18.58	0	2A	69	Male	Yes	bronchioid	Yes	cisplatin	prox-prolif	TRU_1	NA	S1	AD.3	Wound healing	3.79005	2.62598	0.280013	0.623922	0.210714	0.6218	46.5667	0.923524
TCGA-55-8506-01	0.36	0	2B	62	Female	Yes	bronchioid	No	NA	prox-inflam	TRU_1	Mesenchymal	S1	AD.2	IFN gamma dominant	2.82896	2.61326	0.38034	0.633453	0.29963	0.3267	52.7333	0.767494
TCGA-44-7670-01	29	0	2A	47	Female	Yes	bronchioid	Yes	Cisplatin	prox-prolif	prox.-prolif._1	NA	S4	AD.1	Wound healing	3.20851	2.75885	0.422641	0.670588	0.198444	0.6345	67.4333	0.91759
TCGA-05-4427-01	26.01	0	2B	65	Female	Yes	bronchioid	Yes	Cisplatin	prox-inflam	prox.-inflam	Mesenchymal	S3	AD.2	IFN gamma dominant	3.32861	2.98992	NA	0.749069	0.648248	0.395	31.7	0.751781
TCGA-35-5375-01	8.68	0	3A	61	Male	Yes	squamoid	No	NA	prox-inflam	prox.-prolif._1	NA	S4	AD.1	IFN gamma dominant	2.12896	1.90321	NA	0.682969	0.643406	0.5996	12.9333	0.737236
TCGA-44-2656-01	46.98	0	1B	59	Male	Yes	bronchioid	No	NA	prox-inflam	prox.-inflam	Mesenchymal	S3	AD.5a	IFN gamma dominant	2.88582	3.07432	NA	0.709172	0.789257	NA	50.7	0.548125
TCGA-44-2665-01	42.77	0	2B	55	Female	No	bronchioid	Yes	Cisplatin	prox-inflam	prox.-inflam	Mesenchymal	S2	AD.3	TGF beta dominant	2.7217	3.42059	NA	0.731396	0.772251	NA	2.66667	0.554788
TCGA-44-2666-01	3.19	1	1B	43	Male	Yes	bronchioid	No	NA	TRU	TRU_1	Mucinous	S5	AD.5a	IFN gamma dominant	2.81985	2.65399	NA	0.667791	0.17557	NA	2.46667	0.876223
TCGA-44-2668-01	25.02	1	1B	51	Male	Yes	squamoid	No	NA	prox-inflam	prox.-inflam	NA	S3	AD.4	IFN gamma dominant	2.76274	3.30537	NA	0.705781	0.598601	NA	21	0.564501
TCGA-44-3917-01	38.89	0	1B	33	Female	Yes	neuroendocrine	No	NA	NA	NA	NA	NA	AD.1	IFN gamma dominant	2.76168	1.73176	NA	0.691185	0.189943	NA	6.63333	0.79361
TCGA-44-4112-01	26.56	1	1B	60	Female	Yes	bronchioid	Yes	Cisplatin	prox-inflam	prox.-inflam	Mesenchymal	S2	AD.4	Inflammatory	2.63128	3.29951	NA	0.721497	0.201276	NA	29	0.696035
TCGA-44-5643-01	33.3	0	3A	53	Male	Yes	squamoid	Yes	NA	prox-prolif	prox.-prolif._1	Mucinous	S4	NA	IFN gamma dominant	4.06966	2.53699	NA	0.72264	0.257967	0.5689	7.43333	0.872962
TCGA-44-5644-01	28.37	0	1B	51	Female	Yes	neuroendocrine	No	NA	prox-prolif	prox.-prolif._3	Proliferative	S4	AD.1	Wound healing	3.84649	2.62892	NA	0.53028	0.121967	0.6632	60.1	0.944304
TCGA-44-6146-01	23.93	0	2B	64	Male	Yes	bronchioid	Yes	Cisplatin	TRU	TRU_2	Mucinous	S5	AD.5b	Inflammatory	2.69767	2.76232	NA	0.698685	0.180767	NA	2.5	0.833783
TCGA-44-6775-01	23.18	0	1B	72	Female	Yes	bronchioid	No	NA	prox-inflam	prox.-inflam	Mesenchymal	S2	AD.4	IFN gamma dominant	3.07918	3.27164	NA	0.676653	0.679654	NA	4.1	0.557107
TCGA-44-7660-01	19.46	0	1B	72	Male	Yes	squamoid	No	NA	prox-prolif	prox.-prolif._1	Mucinous	S4	NA	Wound healing	3.68324	2.81593	NA	0.612576	0.246819	0.6653	22.2	0.863433
TCGA-44-7661-01	18.31	1	1B	69	Female	Yes	bronchioid	No	NA	prox-inflam	prox.-inflam	Mesenchymal	S3	AD.2	IFN gamma dominant	3.00567	3.40341	NA	0.687762	0.720689	0.0147	18.1667	0.581782
TCGA-44-7667-01	36.07	0	2B	49	Female	Yes	neuroendocrine	No	NA	prox-prolif	prox.-prolif._3	Proliferative	S4	AD.1	Wound healing	2.88669	1.86564	NA	0.527587	0.166694	0.3866	28.4	0.884669
TCGA-44-7669-01	18.87	1	2A	59	Male	Yes	neuroendocrine	Yes	Cisplatin	prox-prolif	prox.-prolif._1	Proliferative	S4	AD.1	IFN gamma dominant	2.89893	2.63557	NA	0.548056	0.239183	0.4144	27.8333	0.775642
TCGA-49-6743-01	53.29	0	3A	81	Female	Yes	squamoid	Yes	Cisplatin	prox-inflam	prox.-prolif._4	NA	S4	AD.3	Wound healing	3.87612	2.54766	NA	0.712687	0.238682	0.1102	23	0.729153
TCGA-50-5066-01	47.41	0	1B	72	Male	No	bronchioid	Yes	NA	prox-inflam	prox.-prolif._1	NA	S3	AD.3	IFN gamma dominant	1.90822	2.21543	NA	0.749963	0.731043	0.0599	8.83333	0.527029
TCGA-50-6590-01	42.34	1	1B	72	Female	Yes	squamoid	Yes	NA	prox-inflam	prox.-inflam	Mucinous	S3	AD.1	IFN gamma dominant	3.43795	2.86058	NA	0.68876	0.732724	0.1035	27.7	0.62757
TCGA-50-6592-01	25.54	1	1B	71	Female	Yes	squamoid	No	NA	prox-inflam	prox.-prolif._4	Mucinous	S4	AD.1	IFN gamma dominant	3.12266	2.64788	NA	0.76154	0.568114	0.0987	8.86667	0.663167
TCGA-50-6594-01	12.16	1	3A	79	Female	Yes	bronchioid	No	NA	prox-inflam	prox.-inflam	Mesenchymal	S3	AD.4	Wound healing	3.07267	2.66119	NA	0.737256	0.731469	0.4787	16.3	0.819112
TCGA-55-6712-01	5.62	1	2A	71	Male	Yes	bronchioid	Yes	NA	prox-inflam	prox.-inflam	Mesenchymal	S3	AD.2	IFN gamma dominant	2.86861	3.21676	NA	0.724859	0.776366	0.3129	4.3	0.630806
TCGA-55-6975-01	3.88	1	2B	61	Male	Yes	squamoid	No	NA	prox-inflam	prox.-prolif._4	NA	S4	AD.3	IFN gamma dominant	2.7899	2.8031	NA	0.609964	0.152986	0.196	2.86667	0.723804
TCGA-55-6978-01	5.79	1	2A	81	Male	No	bronchioid	No	NA	prox-inflam	prox.-inflam	Mesenchymal	S3	AD.2	IFN gamma dominant	2.68407	3.4392	NA	0.704487	0.643568	0.0102	1.86667	0.463917
TCGA-55-6982-01	32.71	1	2B	79	Female	No	bronchioid	Yes	NA	prox-inflam	prox.-inflam	Mesenchymal	S2	AD.2	IFN gamma dominant	2.81348	2.96267	NA	0.672514	0.782396	0.0799	7.2	0.641765
TCGA-55-6983-01	92.81	0	2B	81	Male	Yes	neuroendocrine	Yes	NA	prox-prolif	prox.-prolif._3	Proliferative	S5	AD.2	Inflammatory	2.76676	2.76939	NA	0.680524	0.606511	0.0996	3.53333	0.659041
TCGA-55-6984-01	24.99	1	2B	71	Female	NA	squamoid	Yes	NA	prox-prolif	TRU_2	NA	S5	AD.4	Wound healing	2.66935	3.15073	NA	0.747601	0.170873	0.1609	1.06667	0.864599
TCGA-55-6986-01	107.21	0	1B	74	Female	No	bronchioid	No	NA	TRU	TRU_1	Mesenchymal	S5	AD.5a	Inflammatory	2.69968	2.77302	NA	0.702391	0.737678	0.041	0.766667	0.787763
TCGA-55-7227-01	31.3	1	3A	77	Male	Yes	bronchioid	Yes	NA	TRU	TRU_1	NA	NA	AD.5a	IFN gamma dominant	2.87554	3.18106	NA	0.750351	0.761252	NA	5.03333	0.604938
TCGA-55-7910-01	34.19	0	2A	50	Female	Yes	neuroendocrine	Yes	Cisplatin	prox-prolif	prox.-prolif._3	Proliferative	S4	AD.1	Wound healing	3.27752	2.51289	NA	0.686469	0.131765	0.5284	9.56667	0.868809
TCGA-55-7994-01	19.82	0	2B	81	Male	Yes	bronchioid	Yes	NA	prox-inflam	prox.-inflam	Mesenchymal	S3	AD.2	IFN gamma dominant	3.31489	3.11311	NA	0.688697	0.780023	0.5861	46.3667	0.714048
TCGA-64-5779-01	28.41	0	3A	61	Male	Yes	neuroendocrine	Yes	Cisplatin	prox-prolif	prox.-prolif._3	Proliferative	S4	AD.1	Inflammatory	2.7968	2.62341	NA	0.619598	0.150754	0.6682	10.7667	0.734069
TCGA-64-5815-01	28.47	0	2B	74	Male	Yes	squamoid	Yes	NA	prox-inflam	prox.-inflam	Mesenchymal	S2	AD.2	Wound healing	2.48367	2.94197	NA	0.693478	0.747981	0.185	4.9	0.537137
TCGA-69-7973-01	7.56	0	1B	42	Female	Yes	neuroendocrine	Yes	Cisplatin	prox-prolif	prox.-prolif._3	Proliferative	S4	AD.1	Wound healing	3.14702	2.54829	NA	0.707947	0.198783	0.4716	8	0.850838
TCGA-69-7974-01	6.05	0	3A	54	Female	Yes	bronchioid	Yes	Cisplatin	prox-inflam	prox.-inflam	Mesenchymal	S3	AD.2	IFN gamma dominant	3.29469	3.2336	NA	0.716918	0.702253	0.1959	16.0667	0.634954
TCGA-69-7978-01	4.41	0	2B	59	Male	Yes	bronchioid	No	NA	prox-inflam	prox.-inflam	Mesenchymal	S3	AD.2	IFN gamma dominant	3.10467	3.37763	NA	0.656258	0.738142	0.0369	18.2	0.513905
TCGA-69-7979-01	13.41	0	1B	71	Female	Yes	bronchioid	No	NA	prox-inflam	prox.-prolif._1	NA	S1	AD.3	Wound healing	2.95347	2.93107	NA	0.76146	0.215763	0.6272	44.0333	0.858612
TCGA-69-A59K-01	19.43	0	2B	60	Female	Yes	bronchioid	Yes	cisplatin	prox-inflam	TRU_1	Mesenchymal	S3	AD.2	IFN gamma dominant	2.8081	2.64253	NA	0.695223	0.244658	0.4943	14.6	0.787694
TCGA-71-8520-01	6.9	1	1B	60	Female	No	bronchioid	No	NA	prox-inflam	TRU_1	NA	NA	AD.2	IFN gamma dominant	3.07171	2.98024	NA	0.795954	0.20967	NA	2.66667	0.76576
TCGA-75-5125-01	66.64	1	2B	NA	Male	Yes	bronchioid	No	NA	prox-inflam	prox.-inflam	Mesenchymal	S3	AD.2	IFN gamma dominant	3.07004	2.94247	NA	0.702777	0.743469	0.3035	5.46667	0.661935
TCGA-75-5146-01	77.85	0	1B	NA	Male	Yes	bronchioid	No	NA	TRU	prox.-prolif._2	Proliferative	S5	AD.4	Inflammatory	2.46387	2.40922	NA	0.657919	0.687633	0.3219	5.63333	0.737903
TCGA-75-5147-01	43.82	0	1B	NA	Female	No	bronchioid	No	NA	prox-inflam	prox.-prolif._1	NA	S4	AD.3	IFN gamma dominant	2.94932	2.55971	NA	0.711938	0.599653	0.414	1.3	0.695387
TCGA-75-6206-01	85.15	0	1B	NA	Male	Yes	neuroendocrine	No	NA	TRU	prox.-prolif._2	Proliferative	S5	AD.5b	Inflammatory	2.95273	2.8684	NA	0.666167	0.357864	0.4203	2.7	0.763768
TCGA-75-6212-01	49.84	1	2B	NA	Female	No	bronchioid	Yes	Cisplatin	TRU	TRU_1	Mesenchymal	S5	AD.4	Inflammatory	2.56065	2.95494	NA	0.696646	0.867336	0.2365	0.666667	0.675718
TCGA-75-6214-01	36.66	1	3A	NA	Female	Yes	squamoid	No	NA	prox-prolif	prox.-prolif._1	Mucinous	S4	AD.1	IFN gamma dominant	3.11326	2.9616	NA	0.630541	0.236719	0.519	21.4	0.912697
TCGA-75-7025-01	108.66	0	1B	NA	Male	Yes	bronchioid	No	NA	TRU	TRU_3	NA	S5	AD.4	Inflammatory	3.53379	3.15551	NA	0.731217	0.791857	0.2153	1.03333	0.671474
TCGA-75-7027-01	100.57	0	1B	NA	Male	Yes	squamoid	No	NA	prox-prolif	prox.-prolif._4	Mucinous	S4	AD.1	Wound healing	3.19031	2.83493	NA	0.624943	0.186182	0.657	7.1	0.807787
TCGA-78-7146-01	5.69	1	3A	71	Female	Yes	squamoid	No	NA	prox-inflam	prox.-inflam	Mesenchymal	S3	AD.3	IFN gamma dominant	3.14432	3.0595	NA	0.794608	0.325989	0.5733	11.6	0.864743
TCGA-78-7220-01	26.53	1	3A	53	Female	Yes	neuroendocrine	No	NA	prox-prolif	prox.-prolif._4	NA	S4	AD.1	IFN gamma dominant	3.59896	2.38834	NA	0.620214	0.142633	0.5333	24.7333	0.91337
TCGA-78-8648-01	39.75	1	2B	58	Female	Yes	bronchioid	No	NA	prox-inflam	prox.-prolif._1	NA	S3	AD.4	Inflammatory	2.41903	2.86696	NA	0.691027	0.820052	0	0.5	0.362606
TCGA-80-5611-01	85.31	0	1B	NA	Male	Yes	bronchioid	No	NA	prox-inflam	prox.-prolif._1	NA	S4	AD.1	IFN gamma dominant	3.47603	2.60521	NA	0.71048	0.656251	0.5728	6.4	0.716998
TCGA-86-7711-01	34.39	1	2A	70	Male	Yes	squamoid	Yes	Cisplatin	prox-inflam	prox.-prolif._4	Mucinous	S4	AD.3	Wound healing	3.04836	2.36385	NA	0.741307	0.319364	0.4361	13.5333	0.666626
TCGA-86-7954-01	19.89	0	1B	68	Female	Yes	bronchioid	Yes	NA	TRU	prox.-prolif._1	Proliferative	S4	AD.3	IFN gamma dominant	3.71873	3.11871	NA	0.694181	0.767002	0.2595	6.13333	0.627399
TCGA-86-7955-01	35.24	0	1B	62	Male	No	neuroendocrine	Yes	Cisplatin	prox-prolif	prox.-prolif._1	Proliferative	S4	AD.1	Wound healing	3.40753	2.18455	NA	0.703656	0.139676	0.6063	9.13333	0.982791
TCGA-91-6830-01	1.97	0	2A	65	Female	Yes	squamoid	No	NA	TRU	prox.-prolif._4	Mucinous	S5	AD.3	IFN gamma dominant	3.45553	3.12232	NA	0.70634	0.278407	0.0451	8.13333	0.645162
TCGA-91-6831-01	10.19	0	1B	66	Male	Yes	neuroendocrine	No	NA	prox-prolif	prox.-prolif._3	Proliferative	S4	AD.1	Wound healing	2.8048	2.61802	NA	0.543309	0.216169	0.459	8.6	0.704583
TCGA-91-6836-01	13.71	0	1B	52	Female	Yes	bronchioid	No	NA	prox-inflam	prox.-inflam	Mesenchymal	S3	AD.2	IFN gamma dominant	3.26424	2.30128	NA	0.727249	0.171615	0.5486	15.2	0.898287
TCGA-91-6848-01	7.36	0	3A	59	Male	Yes	squamoid	Yes	Cisplatin	prox-inflam	prox.-prolif._1	NA	S3	AD.1	Wound healing	2.73601	3.07625	NA	0.725217	0.291495	0.2565	18.7	0.577761
TCGA-MP-A4T4-01	86.04	1	2B	68	Female	Yes	bronchioid	No	NA	prox-inflam	prox.-inflam	Mesenchymal	S3	AD.4	IFN gamma dominant	3.06039	3.19846	NA	0.669932	0.742254	0.0677	11.7667	0.562495
TCGA-MP-A4T6-01	58.85	1	3A	76	Female	Yes	bronchioid	No	NA	TRU	TRU_1	Mesenchymal	S5	AD.4	IFN gamma dominant	3.96359	3.05878	NA	0.722819	0.589744	0.7107	1.93333	0.847072
TCGA-MP-A4TD-01	10.09	1	3A	71	Male	Yes	neuroendocrine	Yes	Cisplatin	prox-prolif	prox.-prolif._3	NA	S4	AD.5a	Inflammatory	3.1988	2.95154	NA	0.637772	0.233589	0.2191	2.33333	0.682836
TCGA-NJ-A55O-01	0.43	0	2A	56	Female	Yes	neuroendocrine	No	NA	TRU	prox.-prolif._2	Mucinous	S5	AD.4	Inflammatory	3.25925	2.73707	NA	0.702791	0.389875	0.0194	4.13333	0.770128
TCGA-05-4249-01	50.07	0	1B	67	Male	Yes	bronchioid	No	NA	TRU	TRU_1	Mesenchymal	S5	AD.5b	Inflammatory	3.14976	2.90853	NA	NA	0.72516	0.2221	10	0.727996
TCGA-05-4250-01	3.98	1	3A	79	Female	Yes	squamoid	No	NA	prox-inflam	prox.-inflam	NA	S3	AD.2	Wound healing	2.6177	2.93105	NA	NA	0.695551	0.2362	10.4	0.679951
TCGA-05-4382-01	19.96	0	1B	68	Male	Yes	bronchioid	No	NA	prox-inflam	prox.-prolif._1	NA	S2	AD.3	TGF beta dominant	3.46454	3.01489	NA	NA	0.788788	0.0854	51.7	0.54896
TCGA-05-4397-01	24.03	1	2B	65	Male	Yes	neuroendocrine	No	NA	prox-inflam	prox.-prolif._1	NA	S4	AD.1	IFN gamma dominant	2.67052	2.72538	NA	NA	0.363509	0.2784	24.9333	0.841404
TCGA-05-4403-01	19	0	1B	76	Male	Yes	squamoid	No	NA	TRU	TRU_2	Mucinous	S5	AD.5b	IFN gamma dominant	2.19661	2.75904	NA	NA	0.735478	0.0272	4.2	0.690696
TCGA-05-4418-01	9.01	1	3A	69	Male	Yes	squamoid	No	NA	prox-prolif	prox.-prolif._4	Mucinous	S4	AD.3	IFN gamma dominant	2.49808	2.51194	NA	NA	0.635858	0.1433	8.23333	0.712706
TCGA-05-4420-01	29.98	0	1B	41	Male	Yes	neuroendocrine	No	NA	prox-prolif	prox.-prolif._3	Proliferative	S4	AD.1	Wound healing	2.74425	2.26149	NA	NA	0.146003	0.4499	8.53333	0.862544
TCGA-05-4422-01	12	0	1B	68	Male	Yes	neuroendocrine	No	NA	prox-prolif	prox.-prolif._2	NA	S4	AD.5b	IFN gamma dominant	3.38949	2.66344	NA	NA	0.804011	0.2305	1.3	0.751819
TCGA-05-4426-01	26.01	0	1B	71	Male	Yes	bronchioid	No	NA	prox-inflam	TRU_1	Mesenchymal	S3	AD.5b	IFN gamma dominant	2.66085	3.12737	NA	NA	0.586676	0.1445	1.46667	0.806338
TCGA-05-4430-01	25.02	0	1B	59	Female	Yes	bronchioid	No	NA	TRU	TRU_3	Mesenchymal	S2	AD.2	IFN gamma dominant	3.04981	2.78024	NA	NA	0.715091	0.0992	8.66667	0.588336
TCGA-05-4432-01	25.02	0	2B	66	Male	Yes	neuroendocrine	Yes	Cisplatin	prox-prolif	prox.-prolif._3	Proliferative	S4	AD.3	IFN gamma dominant	3.19511	2.51759	NA	NA	0.310863	0.4286	17.8333	0.758691
TCGA-35-3615-01	0.46	0	1B	57	Male	No	bronchioid	No	NA	prox-prolif	prox.-prolif._2	Proliferative	S5	AD.5b	Inflammatory	2.61105	2.69239	NA	NA	0.646908	0.1795	3.46667	0.814509
TCGA-38-4625-01	97.74	0	1B	66	Female	Yes	bronchioid	No	NA	prox-inflam	prox.-inflam	NA	S3	AD.2	IFN gamma dominant	1.55184	2.31233	NA	NA	0.667331	0.5261	17.9333	0.742121
TCGA-38-4626-01	120.79	0	2A	57	Female	Yes	bronchioid	No	NA	TRU	prox.-prolif._2	NA	S5	AD.4	TGF beta dominant	2.83395	3.01757	NA	NA	0.783442	0.019	8.03333	0.539
TCGA-38-4627-01	37.71	1	2A	64	Female	Yes	bronchioid	No	NA	prox-inflam	prox.-inflam	NA	S2	AD.3	Wound healing	2.2169	3.03793	NA	NA	0.705517	0.0002	1	0.465403
TCGA-38-4628-01	49.05	1	2B	65	Female	No	bronchioid	Yes	NA	prox-inflam	TRU_1	Mesenchymal	S2	AD.1	Lymphocyte depleted	2.49248	2.36816	NA	NA	0.699139	0.4864	3.73333	0.735777
TCGA-44-2657-01	44.42	0	1B	74	Female	Yes	bronchioid	No	NA	TRU	TRU_3	NA	S5	AD.4	IFN gamma dominant	2.71906	2.79024	NA	NA	0.871334	0.0447	23.7	0.520523
TCGA-44-2659-01	44.94	0	2B	65	Female	Yes	bronchioid	Yes	Cisplatin	TRU	TRU_1	Mesenchymal	S5	AD.4	Inflammatory	3.28453	3.10291	NA	NA	0.819281	0.2823	25.8667	0.64207
TCGA-44-2662-01	42.08	0	1B	65	Male	Yes	bronchioid	Yes	NA	prox-inflam	prox.-inflam	Mesenchymal	S3	NA	TGF beta dominant	3.03036	3.30872	NA	NA	0.295803	NA	12.4333	0.613634
TCGA-44-3396-01	37.15	0	3A	74	Female	Yes	bronchioid	Yes	NA	prox-inflam	prox.-inflam	NA	S3	AD.2	IFN gamma dominant	2.7683	3.02942	NA	NA	0.754648	0.0548	12.1333	0.524281
TCGA-49-4494-01	35.54	1	3A	77	Male	Yes	bronchioid	No	NA	prox-prolif	prox.-inflam	NA	S3	AD.2	IFN gamma dominant	2.32026	2.42014	NA	NA	0.715736	0.1473	5.7	0.770201
TCGA-49-4501-01	46.72	1	1B	67	Female	No	bronchioid	Yes	NA	TRU	TRU_1	NA	S5	AD.4	IFN gamma dominant	2.88996	2.90099	NA	NA	0.786002	0.3168	1.56667	0.670889
TCGA-49-4505-01	14.07	1	2B	61	Female	Yes	bronchioid	No	NA	TRU	TRU_1	Mesenchymal	S2	AD.2	IFN gamma dominant	3.06687	3.17778	NA	NA	0.845002	0.473	6.23333	0.624742
TCGA-49-4506-01	32.84	1	2B	68	Female	Yes	squamoid	No	NA	prox-prolif	prox.-prolif._4	NA	S4	AD.3	IFN gamma dominant	2.1346	2.11267	NA	NA	0.685899	0.0386	3.9	0.737027
TCGA-49-4507-01	8.81	1	3A	73	Female	Yes	squamoid	Yes	NA	prox-inflam	prox.-prolif._4	Mucinous	S4	AD.3	IFN gamma dominant	2.7571	2.40335	NA	NA	0.765033	0.2054	6.13333	0.72383
TCGA-49-4510-01	29.46	1	2B	51	Female	Yes	neuroendocrine	No	NA	TRU	prox.-prolif._2	Proliferative	S5	AD.5b	Inflammatory	3.00699	2.4493	NA	NA	0.412266	0.4297	1.86667	0.836174
TCGA-55-1594-01	38.73	0	3A	68	Male	Yes	neuroendocrine	No	NA	prox-prolif	prox.-prolif._3	Proliferative	S4	AD.1	Wound healing	3.83492	2.31024	NA	NA	0.211135	0.6566	5.63333	0.832283
TCGA-55-1596-01	67.89	0	2B	55	Male	Yes	neuroendocrine	Yes	NA	prox-prolif	prox.-prolif._1	Proliferative	S4	AD.1	IFN gamma dominant	3.26199	2.28716	NA	NA	0.300022	0.7496	5.93333	0.865807
TCGA-64-1677-01	20.65	1	3A	77	Female	Yes	bronchioid	Yes	NA	prox-prolif	TRU_1	NA	S3	AD.2	IFN gamma dominant	2.66191	2.22512	NA	NA	0.57659	0.1277	6.53333	0.812009
TCGA-64-1678-01	39.09	0	2A	70	Female	Yes	neuroendocrine	Yes	NA	prox-prolif	prox.-prolif._3	Proliferative	S4	AD.1	Wound healing	2.23985	1.47419	NA	NA	0.186856	0.5476	NA	0.927136
TCGA-67-3772-01	18.84	0	1B	82	Female	No	bronchioid	No	NA	TRU	TRU_3	NA	S5	AD.3	IFN gamma dominant	2.61548	2.63231	NA	NA	0.852194	0.3283	2	0.627864
TCGA-67-3773-01	14.04	0	1B	84	Female	Yes	bronchioid	No	NA	TRU	TRU_1	Mesenchymal	S5	AD.4	IFN gamma dominant	2.35865	2.70818	NA	NA	0.815441	0.1224	3.2	0.627361
TCGA-67-3774-01	12.66	0	1B	73	Female	Yes	neuroendocrine	No	NA	TRU	prox.-prolif._2	NA	S5	AD.5b	Inflammatory	2.83079	2.67978	NA	NA	0.767708	0.2154	3.16667	0.70959
TCGA-73-4659-01	23.38	1	3A	66	Male	Yes	neuroendocrine	Yes	Cisplatin	prox-prolif	prox.-prolif._3	Proliferative	S4	AD.1	Lymphocyte depleted	3.14964	2.88567	NA	NA	0.345613	0.249	6.4	0.728584
TCGA-73-4668-01	15.35	0	2B	66	Female	Yes	bronchioid	Yes	NA	prox-inflam	prox.-inflam	Mesenchymal	S1	AD.2	Wound healing	2.9365	2.6987	NA	NA	0.283635	0.499	16.2333	0.815483
TCGA-73-4675-01	30.31	1	3A	59	Male	Yes	neuroendocrine	Yes	Cisplatin	prox-prolif	prox.-prolif._2	Proliferative	S1	AD.5b	Inflammatory	3.12531	2.9351	NA	NA	0.328962	0.259	2.13333	0.776307
Removal of neoadjuvant therapy before surgery (PMID: 27158780) : TCGA-50-5072-01, TCGA-64-5775-01, TCGA-73-4676-01

## Sheet: Table S3
Table S3. Gene classifier and pathway metagene
42-gene classifier					Metagene
SYMBOL	GENENAME	ENTREZID	cluster		symbol	type
KRT6A	keratin 6A	3853	squamoid		MUC1	Naspin A/surfactant
KRT16	keratin 16	3868	squamoid		ST3GAL5	Naspin A/surfactant
TRIM29	tripartite motif containing 29	23650	squamoid		SFTPG	Naspin A/surfactant
LYPD3	LY6/PLAUR domain containing 3	27076	squamoid		SELENBP1	Naspin A/surfactant
ARNTL2	aryl hydrocarbon receptor nuclear translocator like 2	56938	squamoid		NAPSA	Naspin A/surfactant
SERPINB5	serpin family B member 5	5268	squamoid		SFTPB	Naspin A/surfactant
COL7A1	collagen type VII alpha 1 chain	1294	squamoid		SLC34A2	Naspin A/surfactant
CPS1	carbamoyl-phosphate synthase 1	1373	neuroendocrine		ADCY1	Neurodevelopment
PCSK1	proprotein convertase subtilisin/kexin type 1	5122	neuroendocrine		SYT4	Neurodevelopment
CALCA	calcitonin related polypeptide alpha	796	neuroendocrine		BEX1	Neurodevelopment
ENO3	enolase 3	2027	neuroendocrine		TAGLN3	Neurodevelopment
FGL1	fibrinogen like 1	2267	neuroendocrine		SYP	Neurodevelopment
AKR7A3	aldo-keto reductase family 7 member A3	22977	neuroendocrine		TMEM145	Neurodevelopment
AQP1	aquaporin 1 (Colton blood group)	358	bronchioid		DGKB	Neurodevelopment
CD207	CD207 molecule	50489	bronchioid		CRMP1	Neurodevelopment
SLC34A2	solute carrier family 34 member 2	10568	bronchioid		CDKN2D	Neurodevelopment
FCGBP	Fc fragment of IgG binding protein	8857	bronchioid		LHX2	Neurodevelopment
DPP4	dipeptidyl peptidase 4	1803	bronchioid		MAPT	Neurodevelopment
COL4A3	collagen type IV alpha 3 chain	1285	bronchioid		SLC35D3	Neurodevelopment
NKX2-1	NK2 homeobox 1	7080	bronchioid		DNER	Neurodevelopment
ST3GAL5	ST3 beta-galactoside alpha-2,3-sialyltransferase 5	8869	bronchioid		SCG3	Neurodevelopment
TMPRSS2	transmembrane serine protease 2	7113	bronchioid		MS4A8B	Neurodevelopment
GPC4	glypican 4	2239	bronchioid		DCX	Neurodevelopment
C1orf116	chromosome 1 open reading frame 116	79098	bronchioid		GNG4	Neurodevelopment
NDNF	neuron derived neurotrophic factor	79625	bronchioid		SNAP25	Neurodevelopment
SELENBP1	selenium binding protein 1	8991	bronchioid		SCG2	Neurodevelopment
HSD17B6	hydroxysteroid 17-beta dehydrogenase 6	8630	bronchioid		INA	Neurodevelopment
C4BPA	complement component 4 binding protein alpha	722	bronchioid		INSM1	Neurodevelopment
PLA2G1B	phospholipase A2 group IB	5319	bronchioid		DDC	Neurodevelopment
CYP4B1	cytochrome P450 family 4 subfamily B member 1	1580	bronchioid		STMN2	Neurodevelopment
FMO5	flavin containing dimethylaniline monoxygenase 5	2330	bronchioid		KIF5C	Neurodevelopment
PIGR	polymeric immunoglobulin receptor	5284	bronchioid		BSN	Neurodevelopment
ROS1	ROS proto-oncogene 1, receptor tyrosine kinase	6098	bronchioid		ELAVL3	Neurodevelopment
SFTPD	surfactant protein D	6441	bronchioid		DBH	Neurodevelopment
NR3C2	nuclear receptor subfamily 3 group C member 2	4306	bronchioid		PROX1	Neurodevelopment
HOPX	HOP homeobox	84525	bronchioid		GRP	Neurodevelopment
SFTPC	surfactant protein C	6440	bronchioid		SCGN	Neurodevelopment
HPGD	15-hydroxyprostaglandin dehydrogenase	3248	bronchioid		CHGA	Neurodevelopment
NRGN	neurogranin	4900	bronchioid		MIAT	Neurodevelopment
AQP4	aquaporin 4	361	bronchioid		ST8SIA5	Neurodevelopment
HLA-DQB2	major histocompatibility complex, class II, DQ beta 2	3120	bronchioid		RHBDL3	Neurodevelopment
COL21A1	collagen type XXI alpha 1 chain	81578	bronchioid		SLC36A4	Neurodevelopment
					ST18	Neurodevelopment
					TSGA14	Neurodevelopment
					SEZ6	Neurodevelopment
					SH3GL2	Neurodevelopment
					KRT6A	Basal/squamous
					CLCA2	Basal/squamous
					GJB6	Basal/squamous
					SPRR2E	Basal/squamous
					TP73L	Basal/squamous
					SPRR1A	Basal/squamous
					DSG3	Basal/squamous
					KRT16	Basal/squamous
					TMPRSS11D	Basal/squamous
					SPRR2D	Basal/squamous
					SPRR2A	Basal/squamous
					SPRR1B	Basal/squamous
					DSC3	Basal/squamous
					S100A2	Basal/squamous
					KIFC1	Proliferation
					STIL	Proliferation
					E2F2	Proliferation
					PRC1	Proliferation
					E2F7	Proliferation
					EZH2	Proliferation
					KNTC1	Proliferation
					TTK	Proliferation
					AURKA	Proliferation
					DEK	Proliferation
					SEPT3	Proliferation
					AURKB	Proliferation
					MCM10	Proliferation
					PTTG3	Proliferation
					FAM83D	Proliferation
					CCNE2	Proliferation
					KIF2C	Proliferation
					CDCA8	Proliferation
					FANCI	Proliferation
					PSIP1	Proliferation
					ACYP1	Proliferation
					FANCG	Proliferation
					DEPDC1B	Proliferation
					TUBA1A	Proliferation
					CDCA5	Proliferation
					TOP2A	Proliferation
					CDCA3	Proliferation
					KIF14	Proliferation
					KIF11	Proliferation
					MGC39900	Proliferation
					CDC2	Proliferation
					USP1	Proliferation
					CCNF	Proliferation
					TPX2	Proliferation
					NUSAP1	Proliferation
					MCM2	Proliferation
					RNASEH2A	Proliferation
					UBE2C	Proliferation
					ECT2	Proliferation
					MCM4	Proliferation
					MCM6	Proliferation
					RFC5	Proliferation
					UHRF1	Proliferation
					PPM1E	Proliferation
					MAD2L1	Proliferation
					FAM72A	Proliferation
					CKAP2L	Proliferation
					STMN1	Proliferation
					KPNA2	Proliferation
					MELK	Proliferation
					UBE2T	Proliferation
					CKS1B	Proliferation
					CDK5R1	Proliferation
					HMGB2	Proliferation
					NEK2	Proliferation
					FOXM1	Proliferation
					CHEK1	Proliferation
					CEP55	Proliferation
					TYMS	Proliferation
					C12ORF48	Proliferation
					CDC45L	Proliferation
					NCAPG	Proliferation
					CENPA	Proliferation
					BUB1	Proliferation
					ACTL6A	Proliferation
					TMSL8	Proliferation
					ASF1B	Proliferation
					FEN1	Proliferation
					TRIP13	Proliferation
					CKAP2	Proliferation
					EXO1	Proliferation
					GINS2	Proliferation
					CENPN	Proliferation
					RAD51AP1	Proliferation
					GMNN	Proliferation
					ATAD2	Proliferation
					CENPF	Proliferation
					NDC80	Proliferation
					ILF3	Proliferation
					CDC20	Proliferation
					BIRC5	Proliferation
					CDKN3	Proliferation
					RACGAP1	Proliferation
					SMC2	Proliferation
					C18ORF56	Proliferation
					CCNB1	Proliferation
					FAM64A	Proliferation
					CCNB2	Proliferation
					TROAP	Proliferation
					CKS2	Proliferation
					PCNA	Proliferation
					C6ORF173	Proliferation
					KIF20A	Proliferation
					HLA-DMA	MHC-II
					HLA-DMB	MHC-II
					HLA-DOA	MHC-II
					HLA-DOB	MHC-II
					HLA-DPA1	MHC-II
					HLA-DPB1	MHC-II
					HLA-DQA1	MHC-II
					HLA-DQA2	MHC-II
					HLA-DQB1	MHC-II
					HLA-DQB2	MHC-II
					HLA-DRA	MHC-II
					HLA-DRB1	MHC-II
					HLA-DRB5	MHC-II
					HLA-DRB3	MHC-II
					HLA-DRB4	MHC-II
					ACAP1	Effector memeory CD8 T cell
					APOL3	Effector memeory CD8 T cell
					ARHGAP10	Effector memeory CD8 T cell
					ATP10D	Effector memeory CD8 T cell
					C3AR1	Effector memeory CD8 T cell
					CCR5	Effector memeory CD8 T cell
					CD160	Effector memeory CD8 T cell
					CD55	Effector memeory CD8 T cell
					CFLAR	Effector memeory CD8 T cell
					CMKLR1	Effector memeory CD8 T cell
					DAPP1	Effector memeory CD8 T cell
					FCRL6	Effector memeory CD8 T cell
					FLT3LG	Effector memeory CD8 T cell
					GZMM	Effector memeory CD8 T cell
					HAPLN3	Effector memeory CD8 T cell
					HLA-DMB	Effector memeory CD8 T cell
					HLA-DPA1	Effector memeory CD8 T cell
					HLA-DPB1	Effector memeory CD8 T cell
					IFI16	Effector memeory CD8 T cell
					LIME1	Effector memeory CD8 T cell
					LTK	Effector memeory CD8 T cell
					NFKBIA	Effector memeory CD8 T cell
					SETD7	Effector memeory CD8 T cell
					SIK1	Effector memeory CD8 T cell
					TRIB2	Effector memeory CD8 T cell
					CD70	Type 1 T helper cell
					TBX21	Type 1 T helper cell
					ADAM8	Type 1 T helper cell
					AHCYL2	Type 1 T helper cell
					ALCAM	Type 1 T helper cell
					B3GALNT1	Type 1 T helper cell
					BBS12	Type 1 T helper cell
					BST1	Type 1 T helper cell
					CD151	Type 1 T helper cell
					CD47	Type 1 T helper cell
					CD48	Type 1 T helper cell
					CD52	Type 1 T helper cell
					CD53	Type 1 T helper cell
					CD59	Type 1 T helper cell
					CD6	Type 1 T helper cell
					CD68	Type 1 T helper cell
					CD7	Type 1 T helper cell
					CD96	Type 1 T helper cell
					CFHR3	Type 1 T helper cell
					CHRM3	Type 1 T helper cell
					CLEC7A	Type 1 T helper cell
					COL23A1	Type 1 T helper cell
					COL4A4	Type 1 T helper cell
					COL5A3	Type 1 T helper cell
					DAB1	Type 1 T helper cell
					DLEU7	Type 1 T helper cell
					DOC2B	Type 1 T helper cell
					EMP1	Type 1 T helper cell
					F12	Type 1 T helper cell
					FURIN	Type 1 T helper cell
					GAB3	Type 1 T helper cell
					GATM	Type 1 T helper cell
					GFPT2	Type 1 T helper cell
					GPR25	Type 1 T helper cell
					GREM2	Type 1 T helper cell
					HAVCR1	Type 1 T helper cell
					HSD11B1	Type 1 T helper cell
					HUNK	Type 1 T helper cell
					IGF2	Type 1 T helper cell
					RCSD1	Type 1 T helper cell
					RYR1	Type 1 T helper cell
					SAV1	Type 1 T helper cell
					SELE	Type 1 T helper cell
					SELP	Type 1 T helper cell
					SH3KBP1	Type 1 T helper cell
					SIT1	Type 1 T helper cell
					SLC35B3	Type 1 T helper cell
					SIGLEC10	Type 1 T helper cell
					SKAP1	Type 1 T helper cell
					THUMPD2	Type 1 T helper cell
					TIGIT	Type 1 T helper cell
					ZEB2	Type 1 T helper cell
					ENC1	Type 1 T helper cell
					FAM134B	Type 1 T helper cell
					FBXO30	Type 1 T helper cell
					FCGR2C	Type 1 T helper cell
					STAC	Type 1 T helper cell
					LTC4S	Type 1 T helper cell
					MAN1B1	Type 1 T helper cell
					MDH1	Type 1 T helper cell
					MMD	Type 1 T helper cell
					RGS16	Type 1 T helper cell
					IL12A	Type 1 T helper cell
					P2RX5	Type 1 T helper cell
					CD97	Type 1 T helper cell
					ITGB4	Type 1 T helper cell
					ICAM3	Type 1 T helper cell
					METRNL	Type 1 T helper cell
					TNFRSF1A	Type 1 T helper cell
					IRF1	Type 1 T helper cell
					HTR2B	Type 1 T helper cell
					CALD1	Type 1 T helper cell
					MOCOS	Type 1 T helper cell
					TRAF3IP2	Type 1 T helper cell
					TLR8	Type 1 T helper cell
					TRAF1	Type 1 T helper cell
					DUSP14	Type 1 T helper cell
					CCL3L1	Regulatory T cell
					CD72	Regulatory T cell
					CLEC5A	Regulatory T cell
					FOXP3	Regulatory T cell
					ITGA4	Regulatory T cell
					L1CAM	Regulatory T cell
					LIPA	Regulatory T cell
					LRP1	Regulatory T cell
					LRRC42	Regulatory T cell
					MARCO	Regulatory T cell
					MMP12	Regulatory T cell
					MNDA	Regulatory T cell
					MRC1	Regulatory T cell
					MS4A6A	Regulatory T cell
					PELO	Regulatory T cell
					PLEK	Regulatory T cell
					PRSS23	Regulatory T cell
					PTGIR	Regulatory T cell
					ST8SIA4	Regulatory T cell
					STAB1	Regulatory T cell
					CCR2	MDSC
					CD14	MDSC
					CD2	MDSC
					CD86	MDSC
					CXCR4	MDSC
					FCGR2A	MDSC
					FCGR2B	MDSC
					FCGR3A	MDSC
					FERMT3	MDSC
					GPSM3	MDSC
					IL18BP	MDSC
					IL4R	MDSC
					ITGAL	MDSC
					ITGAM	MDSC
					PARVG	MDSC
					PSAP	MDSC
					PTGER2	MDSC
					PTGES2	MDSC
					S100A8	MDSC
					S100A9	MDSC

## Sheet: Table S4
Table S4. Classified cell lines and PDXs
CCLE				UTSW				NCI-MATCH				GSE78806
CCLE_ID	PATHOLOGIST_ANNOTATION	cluster		CCLE_ID	Tumor.Subtype	cluster		PDX_ID	CancerType	cluster		PDX_ID	cluster
RERFLCAD2	Adeno	squamoid		H1395	Adenocarcinoma	neuroendocrine		618468_307_R_ORIGINATOR_v2_0_1_4_0_RNASEQ	LUSC	squamoid		3020-HX-P0M1-P1M4-P2M1-P3M1-P4M1	neuroendocrine
NCIH2347	Adeno	bronchioid		H1437	Adenocarcinoma	neuroendocrine		692585_246_R_ORIGINATOR_v1_2_RNASEQ	LUSC	squamoid		3029-HX-P0M1-P1M1-P2M5	squamoid
NCIH2087	Adeno	bronchioid		H1819	Adenocarcinoma	bronchioid		765638_272_R_ORIGINATOR_v1_2_RNASEQ	LUSC	squamoid		1499-HX-P0M1	neuroendocrine
NCIH2085	Adeno	squamoid		H2073	Adenocarcinoma	neuroendocrine		941728_121_R_ORIGINATOR_v2_0_1_6_0_RNASEQ	LUAD	bronchioid		1442-HX-P0M2	bronchioid
LU65	Large_Cell	bronchioid		H2009	Adenocarcinoma	squamoid		952719_076_R_ORIGINATOR_v1_2_RNASEQ	LUAD	neuroendocrine		1442-HX-P0M1-P1M2-P2M3	bronchioid
NCIH1573	Adeno	squamoid		H2087	Adenocarcinoma	bronchioid		997726_040_R_ORIGINATOR_v1_2_RNASEQ	LUSC	squamoid		1980-HX-P0M1-P1M1-P2M3-P4M1	bronchioid
NCIH1651	Adeno	neuroendocrine		H2122	Adenocarcinoma	squamoid		258747_076_R_XB9_v1_2_RNASEQ	LUSC	squamoid		2336-HX-P0M1-P1M2-P2M1-P3M4-P4M1	squamoid
NCIH226	Squamous	neuroendocrine		H2250	Adenocarcinoma	bronchioid		258747_076_R_XB9WS8_v1_2_RNASEQ	LUSC	squamoid		2082-HX-P0M1-P1M4	bronchioid
NCIH1666	Adeno	squamoid		H2258	Adenocarcinoma	bronchioid		258747_076_R_XB9WS9_v1_2_RNASEQ	LUSC	squamoid		1755-HX-P0M1-P1M3-P2M1	squamoid
NCIH1734	Adeno	bronchioid		H2347	Adenocarcinoma	bronchioid		258747_076_R_XB9WT1_v1_2_RNASEQ	LUSC	squamoid		1787-HX-P0M1-P1M4-P2M3	bronchioid
NCIH2342	Adeno	bronchioid		H2882	NSCLC	bronchioid		258747_076_R_XB9WS8V39_v1_2_RNASEQ	LUSC	squamoid		1725-HX-P0M1-P1M1-P2M2	bronchioid
EBC1	Squamous	squamoid		H2887	NSCLC	bronchioid		258747_076_R_XB9WT1Y20_v1_2_RNASEQ	LUSC	squamoid		1586-HX-P0M2-P1M1-P2M4	squamoid
NCIH322	Adeno	squamoid		HCC15	Squamous	neuroendocrine		349418_098_R_JS4_v1_2_RNASEQ	LUAD	bronchioid		1993-HX-P0M1-P1M1-P2M1	squamoid
NCIH2291	Adeno	bronchioid		HCC515	Adenocarcinoma	neuroendocrine		349418_098_R_JS5_v1_2_RNASEQ	LUAD	bronchioid		2030-HX-P0M1-P1M2-P2M1	neuroendocrine
CORL105	Adeno	squamoid		HCC2108	Adenocarcinoma	neuroendocrine		349418_098_R_JU4_v1_2_RNASEQ	LUAD	bronchioid		3408-HX-P0M1-P1M1	squamoid
NCIH1915	Large_Cell	neuroendocrine		HCC2302	Adenocarcinoma	neuroendocrine		349418_098_R_JS4KX0_v1_2_RNASEQ	LUAD	bronchioid		1156-HX-P0M2	neuroendocrine
HCC2279	Adeno	bronchioid		HCC2429	NSCLC	squamoid		349418_098_R_JU4KS6_v1_2_RNASEQ	LUAD	bronchioid		1323-HX-P0M2-P1M1	bronchioid
NCIH838	Adeno	neuroendocrine		HCC366	Adenosquamous	neuroendocrine		349418_098_R_JU4KT5L04_v1_2_RNASEQ	LUAD	bronchioid		1323-HX-P0M1-P1M1	bronchioid
HCC1171	Others	bronchioid		HCC95	Squamous	squamoid		349418_098_R_JU4_RG_M304MK1_v1_2_RNASEQ	LUAD	bronchioid		1156-HX-P0M1	neuroendocrine
NCIH2228	Adeno	bronchioid		HCC4018	Adenocarcinoma	neuroendocrine		417821_307_R_TO3_v1_2_RNASEQ	LUSC	squamoid		1683-HX-P0M1-P1M1-P2M2-P3M1-P4M1	bronchioid
RERFLCAI	Squamous	neuroendocrine		HCC193	Adenocarcinoma	squamoid		417821_307_R_TO3US9_v1_2_RNASEQ	LUSC	squamoid		1823-HX-P0M1	bronchioid
SKMES1	Squamous	neuroendocrine		HCC44	Adenocarcinoma	squamoid		417821_307_R_TO3UT0VL0_v1_2_RNASEQ	LUSC	squamoid		1823-HX-P0M1-P1M1-P2M1-P3M3	bronchioid
NCIH520	Squamous	neuroendocrine		CALU3	Adenocarcinoma	squamoid		417821_307_R_TO3UT3VL8_v1_2_RNASEQ	LUSC	squamoid		1189-HX-P0M1-P1M1	neuroendocrine
HCC15	Squamous	neuroendocrine		EKVX	Adenocarcinoma	neuroendocrine		417821_307_R_TO3UT1VL1Q87_v1_2_RNASEQ	LUSC	squamoid		1795-HX-P0M1	squamoid
CALU6	Others	neuroendocrine		H23	Adenocarcinoma	neuroendocrine		417821_307_R_TO3UT2VL5Q89_v1_2_RNASEQ	LUSC	squamoid		1795-HX-P0M1-P1M4-P2M2	squamoid
SKLU1	Adeno	neuroendocrine		H125	Adenosquamous	squamoid		618468_307_R_PTQ_v2_0_1_4_0_RNASEQ	LUSC	squamoid		1795-HX-P0M1-P1M4-P2M1-P3M1	squamoid
SW900	Squamous	bronchioid		H157	Squamous	squamoid		618468_307_R_PTQFW8_v2_0_1_4_0_RNASEQ	LUSC	squamoid		1755-HX-P0M1	squamoid
PC14	Others	squamoid		H324	Adenocarcinoma	squamoid		618468_307_R_PTUFX5_v2_0_1_4_0_RNASEQ	LUSC	squamoid		1367-HX-P0M1-P1M1	bronchioid
NCIH810	Large_Cell	neuroendocrine		H358	Adenocarcinoma	bronchioid		618468_307_R_PTQFW9M564_v2_0_1_4_0_RNASEQ	LUSC	squamoid		1499-HX-P0M1-P1M1-P2M2	neuroendocrine
RERFLCMS	Others	neuroendocrine		H441	Adenocarcinoma	bronchioid		618468_307_R_PTTFX1M582_v2_0_1_4_0_RNASEQ	LUSC	squamoid		1726-HX-P0M3-P1M2	squamoid
NCIH460	Large_Cell	neuroendocrine		H520	Squamous	neuroendocrine		692585_246_R_AB7IJ0_v1_2_RNASEQ	LUSC	squamoid		1726-HX-P0M1	squamoid
LU99	Large_Cell	neuroendocrine		H522	Adenocarcinoma	squamoid		692585_246_R_AB7IJ0NI0_v1_2_RNASEQ	LUSC	squamoid		1835-HX-P0M1	bronchioid
CAL12T	Others	squamoid		H647	Adenosquamous	squamoid		692585_246_R_AB7IJ0NH9QS9_v1_2_RNASEQ	LUSC	squamoid		1834-HX-P0M1	squamoid
LUDLU1	Squamous	squamoid		H1650	Adenocarcinoma	squamoid		692585_246_R_AB7IJ1NK6M780_v1_2_RNASEQ	LUSC	squamoid		1787-HX-P0M1-P1M4-P2M3-P3M3-P4M1	bronchioid
CORL23	Large_Cell	squamoid		H820	Adenocarcinoma	bronchioid		729321_352_R_YK2_v1_2_RNASEQ	LUAD	neuroendocrine		1934-HX-P0M1	neuroendocrine
MORCPR	Adeno	squamoid		H838	Adenocarcinoma	neuroendocrine		729321_352_R_YK4_v1_2_RNASEQ	LUAD	neuroendocrine		1934-HX-P0M1-P1M1-P2M3-P3M1	neuroendocrine
HARA	Squamous	squamoid		H920	Adenocarcinoma	bronchioid		729321_352_R_YK3_L_XS7_v1_2_RNASEQ	LUAD	neuroendocrine		1979-HX-P0M1	squamoid
NCIH1568	Adeno	squamoid		H969	Adenocarcinoma	bronchioid		729321_352_R_YK3_R_XS2_v1_2_RNASEQ	LUAD	neuroendocrine		1979-HX-P0M1-P1M1	squamoid
NCIH1563	Adeno	neuroendocrine		H1355	Adenocarcinoma	neuroendocrine		729321_352_R_YK4WE2_v1_2_RNASEQ	LUAD	neuroendocrine		1869-HX-P0M1	neuroendocrine
NCIH358	Adeno	bronchioid		H1373	Adenocarcinoma	bronchioid		765638_272_R_AG1_v1_2_RNASEQ	LUSC	squamoid		1870-HX-P0M1	neuroendocrine
NCIH1650	Adeno	squamoid		H1385	Squamous	neuroendocrine		765638_272_R_AG2_v1_2_RNASEQ	LUSC	squamoid		1586-HX-P0M2-P1M1-P2M3-P3M2-P4M1	squamoid
NCIH1793	Adeno	bronchioid		H1568	Adenocarcinoma	neuroendocrine		765638_272_R_AG2I09_v1_2_RNASEQ	LUSC	squamoid		1870-HX-P0M1-P1M2	neuroendocrine
NCIH1437	Adeno	neuroendocrine		H1573	Adenocarcinoma	squamoid		765638_272_R_AG3AX5_v1_2_RNASEQ	LUSC	squamoid		1481-HX-P0M1-P1M1	squamoid
KNS62	Squamous	squamoid		H1623	Adenocarcinoma	squamoid		765638_272_R_AG4I01IB7_v1_2_RNASEQ	LUSC	squamoid		1370-HX-P0M1	squamoid
NCIH1792	Adeno	neuroendocrine		H1648	Adenocarcinoma	squamoid		827478_307_R_AO2_v1_2_RNASEQ	LUSC	squamoid		1492-HX-P0M1	neuroendocrine
IALM	Large_Cell	neuroendocrine		H650	Adenocarcinoma	neuroendocrine		827478_307_R_AO2N44E18_v1_2_RNASEQ	LUSC	squamoid		1172-HX-P0M1-P1M1	bronchioid
EPLC272H	Squamous	squamoid		H1651	Adenocarcinoma	neuroendocrine		827478_307_R_AO2N44_RG_J23_v1_2_RNASEQ	LUSC	squamoid		3400-HX-P0M1-P1M1	squamoid
NCIH1355	Adeno	neuroendocrine		H1666	Adenocarcinoma	neuroendocrine		914883_182_B_N81M293_v2_0_1_4_0_RNASEQ	LUSC	squamoid		1323-HX-P0M1-P1M4-P2M1-P3M2-P4M1	bronchioid
HCC95	Squamous	squamoid		H1703	Adenosquamous	squamoid		914883_182_B_N81M295_RG_09A_v2_0_1_4_0_RNASEQ	LUSC	squamoid		1658-HX-P0M1-P1M3-P2M1-P3M4	bronchioid
HCC1438	Large_Cell	neuroendocrine		H1734	Adenocarcinoma	bronchioid		914883_182_B_N81M297X47_v2_0_1_4_0_RNASEQ	LUSC	squamoid		1979-HX-P0M1-P1M1-P2M2-P3M3-P4M1	squamoid
HCC2108	Adeno	neuroendocrine		H1755	Adenocarcinoma	neuroendocrine		941728_121_R_NVC_v2_0_1_4_0_RNASEQ	LUAD	bronchioid		2096-HX-P0M2-P1M2-P2M1-P3M1-P4M1	squamoid
HCC1359	Large_Cell	neuroendocrine		H1781	Adenocarcinoma	bronchioid		941728_121_R_NVCJV8_v2_0_1_4_0_RNASEQ	LUAD	bronchioid		1481-HX-P0M1-P1M1-P2M4-P3M3-P4M1	squamoid
NCIH2110	Others	neuroendocrine		H1792	Adenocarcinoma	squamoid		941728_121_R_NVCJW0_v2_0_1_4_0_RNASEQ	LUAD	bronchioid		1370-HX-P0M1-P1M4	squamoid
CHAGOK1	Lung:Others	squamoid		H1793	Adenocarcinoma	neuroendocrine		941728_121_R_NVGK03_v2_0_1_4_0_RNASEQ	LUAD	bronchioid		1367-HX-P0M1-P1M3	bronchioid
NCIH2172	Others	neuroendocrine		H1838	Adenocarcinoma	bronchioid		941728_121_R_NVCJW0KU0_v2_0_1_6_0_RNASEQ	LUAD	bronchioid		1644-HX-P0M1	squamoid
NCIH596	Adeno	squamoid		H1869	Squamous	bronchioid		941728_121_R_NVGK03N50_v2_0_1_4_0_RNASEQ	LUAD	bronchioid		1644-HX-P0M1-P1M1-P2M1	squamoid
NCIH650	Adeno	neuroendocrine		H1944	Adenocarcinoma	neuroendocrine		952719_076_R_P53_v1_2_RNASEQ	LUAD	neuroendocrine		1658-HX-P0M2	bronchioid
SW1573	Squamous	neuroendocrine		H1975	Adenocarcinoma	squamoid		952719_076_R_P56_v1_2_RNASEQ	LUAD	neuroendocrine		1725-HX-P0M1	bronchioid
HCC366	Adeno	neuroendocrine		H2023	Adenocarcinoma	neuroendocrine		952719_076_R_P57_v1_2_RNASEQ	LUAD	neuroendocrine		2094-HX-P0M1-P1M1-P2M1-P3M2-P4M1	squamoid
NCIH292	Lung:Others	squamoid		H2030	Adenocarcinoma	neuroendocrine		952719_076_R_P53PH1_v1_2_RNASEQ	LUAD	neuroendocrine		2082-HX-P0M1-P1M4-P2M3-P3M2	bronchioid
HCC1833	Adeno	neuroendocrine		H2085	Adenocarcinoma	squamoid		952719_076_R_P54PH6_v1_2_RNASEQ	LUAD	neuroendocrine		1726-HX-P0M2-P1M2-P2M4-P3M4-P4M1	squamoid
NCIH3255	Adeno	bronchioid		H2086	Adenocarcinoma	bronchioid		952719_076_R_P56PH7_v1_2_RNASEQ	LUAD	neuroendocrine		4213-HX-P0M1-P1M1	neuroendocrine
HCC1195	Adeno	bronchioid		H2110	NSCLC	neuroendocrine		952719_076_R_P57PE2_v1_2_RNASEQ	LUAD	neuroendocrine		2096-HX-P0M1-P1M1-P2M1	squamoid
NCIH854	Adeno	neuroendocrine		H2170	Squamous	squamoid		997726_040_R_X17_v1_2_RNASEQ	LUSC	squamoid		1683-HX-P0M1	bronchioid
LC1F	Squamous	squamoid		H2172	NSCLC	neuroendocrine		997726_040_R_X18_v1_2_RNASEQ	LUSC	squamoid		1586-HX-P0M2-P1M1	squamoid
T3M10	Large_Cell	squamoid		H2228	Adenocarcinoma	bronchioid		997726_040_R_X15W14_v1_2_RNASEQ	LUSC	squamoid		1327-HX-P0M1	squamoid
NCIH2023	Adeno	neuroendocrine		H2286	NSCLC	neuroendocrine		997726_040_R_X16XX3_v1_2_RNASEQ	LUSC	squamoid		2017-HX-P0M1-P1M2	bronchioid
DV90	Adeno	squamoid		H2342	Adenocarcinoma	bronchioid		997726_040_R_X18W29_v1_2_RNASEQ	LUSC	squamoid		1993-HX-P0M1-P1M1	squamoid
NCIH1648	Adeno	squamoid		H3122	NSCLC	bronchioid		997726_040_R_X19XY3_v1_2_RNASEQ	LUSC	squamoid		2017-HX-P0M1	bronchioid
NCIH23	Adeno	neuroendocrine		H3255	Adenocarcinoma	bronchioid		WU-0032-T1-X1P2.RNASEQ	LUSC	squamoid		1865-HX-P0M1	squamoid
NCIH1373	Adeno	bronchioid		HCC78	Adenocarcinoma	bronchioid		WU-0054-T1-X1P2.RNASEQ	LUAD	bronchioid		1865-HX-P0M1-P1M1	squamoid
NCIH1623	Adeno	squamoid		HCC149	Adenocarcinoma	bronchioid		WU-0076-T1-X1P2.RNASEQ	LUAD	bronchioid		1725-HX-P0M1-P1M1-P2M2-P3M1-P4M3	bronchioid
NCIH1838	Adeno	bronchioid		HCC364	Adenocarcinoma	bronchioid						2096-HX-P0M1-P1M1-P2M2	squamoid
NCIH1755	Adeno	neuroendocrine		HCC461	Adenocarcinoma	neuroendocrine						1189-HX-P0M1-P1M1-P2M1	neuroendocrine
RERFLCKJ	Others	squamoid		HCC4011	Adenocarcinoma	bronchioid						1189-HX-P0M1-P1M1-P2M2	neuroendocrine
NCIH1693	Adeno	neuroendocrine		HCC4019	Adenocarcinoma	bronchioid						2336-HX-P0M1-P1M2-P2M1	squamoid
LOUNH91	Squamous	neuroendocrine		HCC1588	Squamous	squamoid						3020-HX-P0M1-P1M4-P2M1	neuroendocrine
LK2	Squamous	bronchioid		HCC1313	Squamous	squamoid						1835-HX-P0M1-P1M2-P2M1-P3M1	bronchioid
NCIH441	Adeno	bronchioid		HCC2814	Squamous	squamoid						1323-HX-P0M2-P1M2	bronchioid
RERFLCSQ1	NA	neuroendocrine		HCC2450	Squamous	bronchioid						2094-HX-P0M1	bronchioid
NCIH2030	Adeno	neuroendocrine		HCC2279	Adenocarcinoma	bronchioid						2129-HX-P0M1	squamoid
NCIH2122	Adeno	squamoid		HCC1833	Adenocarcinoma	neuroendocrine						3237-HX-P0M1-P1M2-P2M4	squamoid
A549	Others	neuroendocrine		HCC4006	Adenocarcinoma	bronchioid						2088-HX-P0M1-P1M4	neuroendocrine
NCIH1975	Adeno	neuroendocrine		H1435	Adenocarcinoma	bronchioid						2088-HX-P0M1	neuroendocrine
NCIH647	Adeno	squamoid		HCC1897	Squamous	bronchioid						2030-HX-P0M1-P1M1	neuroendocrine
HCC44	Adeno	squamoid		HCC2935	Adenocarcinoma	bronchioid						1947-HX-P0M1	squamoid
NCIH522	Adeno	neuroendocrine		H596	Adenosquamous	squamoid						2129-HX-P0M1-P1M2-P2M2-P3M1	squamoid
NCIH661	Large_Cell	neuroendocrine		H322	Adenocarcinoma	squamoid						3237-HX-P0M1-P1M2-P2M4-P3M1-P4M1	squamoid
HCC78	Adeno	bronchioid		H2135	NSCLC	neuroendocrine						2129-HX-P0M1-P1M2-P2M1	squamoid
RERFLCAD1	Adeno	bronchioid		HCC122	Adenocarcinoma	bronchioid						2148-HX-P0M1-P1M4-P2M4-P3M4	bronchioid
NCIH1155	Large_Cell	neuroendocrine		H2126	Adenocarcinoma	neuroendocrine						2092-HX-P0M1-P1M4-P2M2	squamoid
ABC1	Others	squamoid		H2444	NSCLC	bronchioid						3843-HX-P0M1-P1M1	squamoid
NCIH1703	Squamous	neuroendocrine		HCC2344	Squamous	squamoid						3408-HX-P0M1-P1M1-P2M1-P3M2	squamoid
NCIH1581	Large_Cell	neuroendocrine		HCC2352	Adenosquamous (mixed)	squamoid						1228-HX-P0M1	squamoid
NCIH1395	Adeno	neuroendocrine		HCC4021	Adenocarcinoma	neuroendocrine						1228-HX-P0M2	squamoid
NCIH1781	Adeno	bronchioid		H1993	Adenocarcinoma	squamoid						1492-HX-P0M2-P1M1	neuroendocrine
NCIH2106	Others	neuroendocrine										1172-HX-P0M1-P1M3	bronchioid
CALU1	Squamous	neuroendocrine										2042-HX-P0M1-P1M3-P2M1-P3M4	squamoid
NCIH2170	Squamous	bronchioid										3029-HX-P0M1-P1M1	squamoid
SQ1	Squamous	bronchioid
NCIH2444	Others	squamoid
NCIH1299	Others	neuroendocrine
HCC2814	NA	squamoid
HCC364	NA	bronchioid
HCC827GR5	NA	bronchioid
NCIH2126	Adeno	squamoid
NCIH1385	Squamous	neuroendocrine
HCC827	Adeno	bronchioid
LXF289	Adeno	neuroendocrine
CALU3	Adeno	bronchioid
NCIH1435	Adeno	squamoid
NCIH2009	Adeno	bronchioid
NCIH1869	Squamous	bronchioid
HCC4006	Adeno	bronchioid
NCIH1944	Adeno	neuroendocrine
NCIH2405	Adeno	neuroendocrine
BEN	Lung:Others	neuroendocrine
HCC2935	Others	bronchioid
LCLC103H	Large_Cell	neuroendocrine
LCLC97TM1	Large_Cell	bronchioid
NCIH2073	Adeno	neuroendocrine
HOP62	Others	neuroendocrine
EKVX	Others	neuroendocrine
HOP92	Others	neuroendocrine
A427	NA	neuroendocrine
NCIH3122	NA	bronchioid
PC9	NA	squamoid

[truncated: 10 more sheets: Table S5, Table S6, Table S7, Table S8, Table S9, Table S10_LINCS, Table S10_CCLEGDSC, Table S11, Table S12, Table S13]
