# Supplementary material for: RNA sequencing identifies lung cancer lineage and facilitates drug repositioning
Source: PeerJ. 2024 Sep 24;12:e18159. doi: 10.7717/peerj.18159 (PMC11430167; doi:10.7717/peerj.18159)
Supplement: Supplemental Information 4 — 1. CCK8 assay 2. Western-blotting ploting KLF5 protein change [file peerj-12-18159-s004.xlsx]

## Sheet: Sheet1
1. CCK8 assay
Cell line	Inhibitor	Concentration(nM)	Cell viability
BEAS-2B	Dinaciclib	0	97.0547	101.686	101.259
		4	105.38	105.363	104.785
		8	44.7646	44.0497	43.6619
		12	38.2789	38.7647	38.0181
		16	36.1813	36.3571	36.8422
		20	35.3023	35.3186	35.1143
		24	32.7538	32.6005	32.7251
		28	31.9389	31.6604	32.8304
		32	32.0146	31.6339	32.4288
Cell line	Inhibitor	Concentration(nM)	Cell viability
1944	Dinaciclib	0	98.4308	101.16	100.409
		4	86.1512	83.6491	84.4455
		6	84.5232	79.5266	80.7352
		8	45.7333	43.7414	43.961
		10	42.297	44.6686	47.5504
		12	32.1601	33.592	32.4945
		14	27.3062	28.7147	27.1604
		16	18.1921	18.8952	18.3726
		18	10.3087	9.55494	9.34615
Cell line	Inhibitor	Concentration(nM)	Cell viability
1944	Flavopiridol	0	102.18	102.988	94.832
		10	91.9809	88.8124	90.0436
		40	82.5445	85.5819	81.7152
		70	30.7892	32.3188	33.2869
		100	17.9739	14.9517	16.7125
		130	13.5004	11.2922	12.9922
		160	11.713	11.7974	11.7304
		190	9.7466	9.86686	9.54555
		220	8.46953	8.34428	9.1294

## Sheet: Sheet2
2. Western-blotting ploting KLF5 protein change
